# Supplementary material for: Male-Biased Cyp17a2 Orchestrates Antiviral Sexual Dimorphism in Fish via STING Stabilization and Viral Protein Degradation
Source: bioRxiv preprint, doi:10.1101/2025.06.23.661124, version 3 (2025-12-02)
Supplement: Table S2 [file 661124_file21.xlsx]

## Sheet: Sheet1
Table. S2 List of all identified genes in FHK-vs-MHK in transcriptomic analysis
gene_id	BaseMean_DESeq2	BaseMean_control_FHK	BaseMean_case_MHK	FoldChange	log2FoldChange	p-value	q-value	Regulation	FPKM_MHK7	FPKM_MHK8	FPKM_MHK9	FPKM_FHK10	FPKM_FHK11	FPKM_FHK12	gene_Dbxref	description	coding_type	GO_id	GO_term	pathway	pathway_description
LOC100000155	3.32135	2.44631	4.19638	1.68975	0.756808	0.544113	0.761038	Up	0.0611616	0.120732	0.0310372	0.029579	0.018417	0.0610416	100000155		protein_coding
LOC100000275	3.27654	6.55308	0	0.0255421	-5.29098	0.0198658	0.111333	Down	0	0	0	0.0115676	0.172857	0.0119359	100000275		protein_coding			dre00562	Inositol phosphate metabolism
LOC100000365	9.2639	8.65065	9.87715	1.18091	0.239903	0.778887	0.897062	Up	0.112867	0.153173	0.200464	0.0545846	0.186925	0.0844838	100000365		protein_coding
LOC100000545	11.4392	8.90389	13.9746	1.58036	0.660255	0.543297	0.760514	Up	0.290926	0.218775	0.140604	0.200996	0.150177	0	100000545		protein_coding
LOC100000633	798.7	1245.7	351.698	0.282488	-1.82374	0.000131678	0.0031649	Down	4.32334	7.51233	4.55826	9.67612	24.0146	13.5869	100000633		protein_coding
LOC100000713	257.453	252.807	262.099	1.03848	0.0544778	0.859796	0.937787	Up	9.37812	8.34357	5.49636	7.20561	6.42744	5.37854	100000713		protein_coding
LOC100000748	30.3808	41.2692	19.4925	0.470452	-1.08788	0.0256187	0.131484	Down	0.237421	0.468666	0.321285	0.65831	0.45755	0.774052	100000748		protein_coding
LOC100000752	2.32285	2.26044	2.38527	1.07533	0.104777	0.936025	0.97341	Up	0.0339536	0.033512	0.0229736	0.0218942	0.0272643	0.0225913	100000752		protein_coding
LOC100000772	120.877	148.473	93.2813	0.630723	-0.664922	0.0237403	0.125233	Down	0.863069	0.787419	0.618317	0.996142	1.03955	1.01338	100000772		protein_coding
LOC100000863	75.5813	122.161	29.0018	0.237771	-2.07235	0.0132789	0.0851364	Down	0.615156	0.21429	2.7177	1.92501	5.36094	4.80325	100000863		protein_coding
LOC100000884	20.1546	23.0035	17.3056	0.74361	-0.427383	0.525966	0.749424	Down	0.177276	0.145809	0.249891	0.228625	0.0711751	0.373515	100000884		protein_coding	GO:0016020	membrane
LOC100000890	2.69856	5.10644	0.290685	0.0640996	-3.96354	0.0426076	0.18102	Down	0.0161305	0	0	0.0156021	0.136002	0.0643956	100000890		protein_coding
LOC100001051	92.8945	82.4169	103.372	1.26013	0.333567	0.588947	0.79085	Up	0.540385	1.47308	2.42885	0.746689	1.41025	0.744782	100001051		protein_coding
LOC100001114	11.7733	10.9728	12.5737	1.13894	0.187694	0.771404	0.89308	Up	0.0684559	0.10442	0.088426	0.0902909	0.0524706	0.0558995	100001114		protein_coding
LOC100001178	6.64247	8.79269	4.49225	0.50146	-0.995793	0.337673	0.603524	Down	0.0840528	0.110613	0.227486	0.541995	0.10124	0.111851	100001178		protein_coding
LOC100001242	2.01968	1.61389	2.42547	1.45379	0.539823	0.781575	0.898607	Up	0	0.0805531	0.0276109	0.0263136	0	0.0407272	100001242		protein_coding
LOC100001344	19.5238	21.9708	17.0768	0.78219	-0.354409	0.531789	0.753574	Down	0.174155	0.294669	0.239881	0.192514	0.254716	0.322796	100001344	uncharacterized LOC100001344	protein_coding
LOC100001363	6.15836	3.99557	8.32115	2.17213	1.11911	0.260633	0.527582	Up	0.330183	0.190102	0.251333	0.106455	0.165708	0.0274613	100001363		protein_coding
LOC100001405	118.187	147.242	89.1323	0.604451	-0.726302	0.0221436	0.120057	Down	0.564114	0.531921	0.408952	0.701529	0.515665	0.92494	100001405		protein_coding
LOC100001479	18.5542	17.8963	19.2121	1.06099	0.0854117	0.914312	0.96304	Up	0.12481	0.271012	0.405354	0.205227	0.0601327	0.39861	100001479		protein_coding
LOC100001534	1.90333	3.50258	0.304085	0.0928602	-3.4288	0.0889276	0.284447	Down	0	0.0173734	0	0.0681026	0.0848065	0.0175678	100001534		protein_coding
LOC100001589	15.9842	13.5727	18.3956	1.35418	0.437418	0.52764	0.750244	Up	0.464271	0.315035	0.1178	0.238564	0.157277	0.17376	100001589		protein_coding
LOC100001608	3.296	3.29808	3.29392	0.967652	-0.0474398	0.967713	0.984807	Down	0.0672981	0.110705	0.0683025	0.130187	0.0270197	0.0671661	100001608		protein_coding
LOC100001620	176.008	151.006	201.011	1.32608	0.407167	0.414548	0.668386	Up	5.89764	4.76658	4.35937	4.28371	0.965016	4.84213	100001620		protein_coding			dre00220	Arginine biosynthesis
LOC100001665	20.875	26.4163	15.3337	0.587643	-0.766987	0.340217	0.605771	Down	0.0695311	0.205881	0.117615	0.0672533	0.307079	0.169631	100001665		protein_coding
LOC100001832	85.6408	92.2847	78.997	0.863248	-0.212153	0.633013	0.818551	Down	1.87237	1.65552	1.64298	1.1319	2.3492	1.44046	100001832		protein_coding
LOC100001846	39.8786	53.362	26.3952	0.490612	-1.02735	0.119535	0.340026	Down	0.350636	0.725111	0.389761	1.72805	0.281556	0.71656	100001846		protein_coding
LOC100001908	3.09493	1.7868	4.40306	2.35934	1.23839	0.509742	0.740529	Up	0.0663404	0.00595251	0.0183629	0.0350002	0	0	100001908		protein_coding
LOC100001991	5.24684	0.935031	9.55865	9.29644	3.21668	0.0144405	0.089882	Up	0.0496854	0.0367794	0.113461	0.0120144	0	0.00619849	100001991		protein_coding
LOC100002043	5.65151	7.70703	3.59598	0.464579	-1.10601	0.424482	0.677833	Down	0.0373052	0	0.416482	0.324748	0.179734	0.335088	100002043		protein_coding
LOC100002059	14.9848	17.1154	12.8542	0.741278	-0.431913	0.687461	0.851143	Down	0.057613	0.0379092	0.181915	0.253861	0.00771041	0.0830555	100002059		protein_coding
LOC100002134	8.4687	11.2706	5.66681	0.501052	-0.996967	0.286077	0.554552	Down	0.148076	0.182687	0.0187857	0.286449	0.15606	0.166258	100002134		protein_coding
LOC100002141	8.11045	6.24742	9.97348	1.56745	0.64842	0.648188	0.828563	Up	0.923559	0.202566	0.0347164	0.430109	0	0.238971	100002141		protein_coding
LOC100002202	15.4877	12.39	18.5854	1.54494	0.627553	0.412457	0.66659	Up	0.398272	0.695471	0.808432	0.177796	0.590413	0.24461	100002202		protein_coding
LOC100002266	63.7256	72.0728	55.3784	0.768067	-0.380697	0.708984	0.863173	Down	0.393924	0.152971	0.661969	0.949425	0.412248	0.0128902	100002266		protein_coding
LOC100002283	66.6087	94.7015	38.5159	0.408728	-1.29079	0.00121129	0.0162441	Down	0.220054	0.260631	0.148892	0.406771	0.488872	0.405082	100002283		protein_coding
LOC100002406	92.0992	112.844	71.3548	0.634738	-0.655767	0.185209	0.437603	Down	0.609408	1.04257	1.58062	1.40157	1.85952	0.986656	100002406		protein_coding
LOC100002469	21.6447	16.8607	26.4288	1.5739	0.654345	0.265274	0.532055	Up	0.267522	0.651304	0.651634	0.310509	0.279261	0.266997	100002469		protein_coding
LOC100002472	1.1912	2.3824	0	0.0684678	-3.86843	0.327185	0.593769	Down	0	0	0	0.196866	0	0	100002472		protein_coding
LOC100002481	2.38402	0.678862	4.08918	5.81021	2.53859	0.285821	0.554356	Up	0.267416	0	0.0452344	0	0	0.0444818	100002481		protein_coding			dre04080	Neuroactive ligand-receptor interaction
LOC100002503	205.719	194.591	216.847	1.1135	0.1551	0.903644	0.957625	Up	7.57318	2.4517	1.10681	7.07603	0.182435	2.04075	100002503		protein_coding
LOC100002570	13.2037	16.5695	9.83797	0.597182	-0.743756	0.355476	0.61834	Down	0.167273	0.151339	0.141474	0.0674137	0.201477	0.375625	100002570		protein_coding
LOC100002591	28.8953	32.9865	24.8041	0.748425	-0.41807	0.586556	0.789451	Down	0.529549	0.226815	0.0811248	0.599178	0.180518	0.209409	100002591		protein_coding
LOC100002633	2.72456	3.06126	2.38786	0.752756	-0.409746	0.795931	0.905051	Down	0.0247789	0.0122283	0.0628717	0.0958685	0	0.0247303	100002633		protein_coding
LOC100002706	224.672	242.316	207.027	0.856733	-0.223083	0.329882	0.596075	Down	5.06127	3.98105	4.44797	4.55785	4.32106	4.49008	100002706		protein_coding
LOC100002814	32.8701	30.7657	34.9745	1.14789	0.19898	0.718687	0.867186	Up	0.580777	0.300707	0.241576	0.19339	0.30963	0.313574	100002814		protein_coding	GO:0016020	membrane
LOC100002960	61.1017	88.1319	34.0716	0.38702	-1.36952	0.0948694	0.296691	Down	1.81019	0.172207	0.553377	0.822709	1.41854	3.19972	100002960	uncharacterized LOC100002960	protein_coding
LOC100003040	5.38926	10.7785	0	0.0152243	-6.03748	0.0121734	0.0798226	Down	0	0	0	0.0293926	0	0.454928	100003040		protein_coding
LOC100003182	12.04	9.5225	14.5575	1.50664	0.591338	0.427135	0.679844	Up	0.205682	0.106337	0.168989	0.170523	0.0589857	0.0488758	100003182		protein_coding
LOC100003291	7.57833	7.71634	7.44031	0.971158	-0.0422219	0.958861	0.981434	Down	0.207009	0.185742	0.0763993	0.14562	0.136002	0.131474	100003291		protein_coding
LOC100003530	4.55916	4.97296	4.14537	0.810181	-0.303684	0.816083	0.914559	Down	0.0796792	0.0224694	0.0577631	0.121108	0	0.056802	100003530		protein_coding
LOC100003687	7.2097	7.16876	7.25063	1.01107	0.0158837	0.989945	0.995446	Up	0.0289713	0.181099	0.0196024	0.12143	0.0697907	0.00963815	100003687		protein_coding
LOC100003704	358.129	334.225	382.032	1.14056	0.189736	0.350328	0.614539	Up	3.91461	3.99975	3.85179	3.71526	2.22472	2.98981	100003704		protein_coding
LOC100003741	91.8419	62.7474	120.936	1.91899	0.940346	0.142246	0.376393	Up	4.25123	4.19594	1.61485	1.25042	0.479113	2.87822	100003741		protein_coding
LOC100004104	1.66152	3.02256	0.300481	0.106484	-3.23129	0.193275	0.448385	Down	0	0	0.053623	0	0.127276	0.316385	100004104		protein_coding
LOC100004180	2.83916	3.57653	2.1018	0.585093	-0.773263	0.598671	0.797527	Down	0.0273703	0.0675358	0	0.0397104	0.0329669	0.0682914	100004180		protein_coding
LOC100004199	1423.92	1450.08	1397.77	0.964003	-0.0528899	0.937476	0.97398	Down	35.9385	15.0177	9.55419	4.90572	14.8559	32.2889	100004199		protein_coding
LOC100004299	455.728	481.117	430.339	0.892676	-0.163792	0.482117	0.721221	Down	1.93965	1.95406	1.89931	2.29561	1.2286	2.12422	100004299		protein_coding	GO:0003924,GO:0005096,GO:0005525,GO:0005829,GO:0007165,GO:0007266,GO:0008361,GO:0050770	GTPase activity|GTPase activator activity|GTP binding|cytosol|signal transduction|Rho protein signal transduction|regulation of cell size|regulation of axonogenesis	dre04510,dre04810	Focal adhesion|Regulation of actin cytoskeleton
LOC100004321	68.7363	77.5589	59.9138	0.766857	-0.382971	0.422951	0.676668	Down	1.04353	1.77718	1.26677	2.37492	0.665423	1.71538	100004321	apoptosis regulator BAX-like	protein_coding			dre04141,dre04210,dre04217,dre04115,dre05168,dre05132	Protein processing in endoplasmic reticulum|Apoptosis|Necroptosis|p53 signaling pathway|Herpes simplex virus 1 infection|Salmonella infection
LOC100004373	52.7285	54.8116	50.6455	0.917123	-0.124813	0.824804	0.919752	Down	0.910229	1.41565	2.35153	2.61455	0.697679	1.23879	100004373		protein_coding
LOC100004411	5.31749	9.46244	1.17254	0.123846	-3.01338	0.124052	0.347182	Down	0.0537314	0	0.0181778	0.0173237	0	0.482634	100004411		protein_coding
LOC100004499	6.09968	8.57815	3.62121	0.41446	-1.27069	0.240903	0.504058	Down	0.0130352	0.0900598	0.052919	0.214339	0.047102	0.0780579	100004499		protein_coding
LOC100004523	3.6264	4.61345	2.63936	0.590265	-0.760564	0.592938	0.793281	Down	0.0506057	0.00713536	0.00733728	0.00699255	0.0522459	0.0288608	100004523		protein_coding
LOC100004744	2.96477	5.92954	0	0.0280408	-5.15633	0.00803129	0.0607027	Down	0	0	0	0.0214837	0.0802593	0.0775871	100004744		protein_coding			dre00480	Glutathione metabolism
LOC100004932	99.1201	83.3142	114.926	1.37461	0.459019	0.450849	0.698226	Up	1.06255	1.26097	2.5548	2.10442	0.624674	0.44186	100004932		protein_coding
LOC100004944	7.82469	5.01459	10.6348	2.06802	1.04825	0.432603	0.684292	Up	0.197434	0.0102561	0.168742	0.100509	0	0.0622253	100004944		protein_coding
LOC100004978	10.086	6.22734	13.9447	2.29123	1.19612	0.185773	0.438341	Up	0.15353	0.0378833	0.171403	0.022275	0.0554771	0.05363	100004978		protein_coding
LOC100005008	2.3719	2.06525	2.67855	1.27544	0.351	0.798877	0.906489	Up	0.0287656	0.00946383	0.0486582	0.0278232	0.0115492	0.0191394	100005008		protein_coding			dre04144	Endocytosis
LOC100005318	3.35712	3.15384	3.5604	1.12177	0.165783	0.892821	0.9522	Up	0.133867	0.0264252	0.163038	0.129481	0.064496	0.0534417	100005318		protein_coding
LOC100005323	4.33873	3.98991	4.68755	1.15833	0.212048	0.894947	0.952808	Up	0.178413	0.0270912	0.0139289	0.026549	0	0.136971	100005323		protein_coding
LOC100005337	16.4343	13.1901	19.6785	1.54165	0.624477	0.428087	0.680249	Up	0.307894	0.264252	0.312489	0.0776889	0.306356	0.0801625	100005337		protein_coding	GO:0005506,GO:0008610,GO:0016020,GO:0016491	iron ion binding|lipid biosynthetic process|membrane|oxidoreductase activity	dre00120	Primary bile acid biosynthesis
LOC100005420	76.9698	109.759	44.1802	0.403589	-1.30904	0.0433979	0.182921	Down	0.687539	0.18231	0.666555	0.446652	1.19893	1.46455	100005420		protein_coding
LOC100005423	62.807	83.2898	42.3243	0.508757	-0.97495	0.0107705	0.0735441	Down	0.503117	0.362085	0.627644	0.74009	0.706993	1.0461	100005423		protein_coding
LOC100005483	3.72239	2.71545	4.72933	1.72365	0.785467	0.718919	0.867186	Up	0.121498	0	0.123311	0	0	0.121259	100005483		protein_coding
LOC100005536	928.433	939.867	916.999	0.976207	-0.0347403	0.849037	0.932619	Down	7.74581	7.23239	6.81849	6.41589	5.6934	6.9243	100005536		protein_coding			dre03013	Nucleocytoplasmic transport
LOC100005584	3.5913	3.92527	3.25733	0.853638	-0.228304	0.8446	0.931151	Down	0.121662	0.0600399	0.0411593	0.0392255	0.097693	0.0809489	100005584		protein_coding
LOC100005640	33.8847	47.7502	20.0192	0.420631	-1.24937	0.0717531	0.25091	Down	0.281461	0.31947	0.342794	0.952841	0.796683	0.1545	100005640		protein_coding
LOC100005689	6.32319	6.64711	5.99927	0.893668	-0.162189	0.852644	0.934199	Down	0.0986449	0.194724	0.200234	0.238533	0.118816	0.123064	100005689		protein_coding
LOC100005864	10.6657	13.8538	7.47747	0.540702	-0.887095	0.488816	0.725834	Down	0.0768698	0.0606961	0.249655	0.371758	0.240729	0	100005864		protein_coding
LOC100005907	152.662	203.798	101.526	0.499026	-1.00281	0.0871784	0.28185	Down	1.31246	1.92604	2.62903	4.07564	4.65928	1.05135	100005907		protein_coding
LOC100005924	5.39674	3.2758	7.51767	2.22304	1.15253	0.497914	0.732333	Up	0.0258509	0.0893013	0.209893	0.137522	0	0	100005924		protein_coding			dre04060	Cytokine-cytokine receptor interaction
LOC100005927	61.8184	46.9446	76.6923	1.64507	0.718152	0.0468657	0.192972	Up	0.433601	0.374466	0.588596	0.251638	0.248075	0.221784	100005927		protein_coding
LOC100005965	106.163	110.614	101.711	0.92552	-0.111664	0.720427	0.867676	Down	1.84014	1.8012	1.54347	1.55921	1.77679	1.39637	100005965		protein_coding
LOC100005990	340.325	367.097	313.552	0.853895	-0.227869	0.356277	0.61857	Down	2.16608	1.8325	2.79381	2.4256	1.84028	2.54787	100005990		protein_coding
LOC100006122	3.07945	3.48396	2.67494	0.75141	-0.412327	0.812126	0.913135	Down	0.0793759	0	0.161121	0.153551	0	0.132034	100006122	uncharacterized LOC100006122	protein_coding
LOC100006250	449.276	599.31	299.242	0.499582	-1.00121	0.0209445	0.115403	Down	6.39116	10.8342	18.9466	20.2567	23.0506	17.5502	100006250		protein_coding			dre05132	Salmonella infection
LOC100006428	26.7076	13.4556	39.9597	3.04871	1.6082	0.0791879	0.266143	Up	0.744411	1.94487	3.15541	0.296481	1.1076	0.131109	100006428		protein_coding			dre04216,dre04217	Ferroptosis|Necroptosis
LOC100006469	74.4489	107.657	41.2409	0.383522	-1.38262	0.0344432	0.159654	Down	0.143163	0.556893	0.452993	0.374692	0.892615	1.25232	100006469		protein_coding
LOC100006557	46.5871	63.6335	29.5407	0.466809	-1.0991	0.270279	0.537305	Down	0.355649	1.60468	0.515652	0.368569	3.33518	0.405658	100006557		protein_coding
LOC100006649	94.4152	105.211	83.619	0.793122	-0.334385	0.606235	0.802799	Down	1.12987	0.649133	2.97808	1.56588	0.751546	2.89487	100006649		protein_coding
LOC100006699	9.53227	5.61878	13.4458	2.49805	1.3208	0.11083	0.325322	Up	0.384587	0.460925	0.390326	0.132853	0.231614	0.0548332	100006699		protein_coding
LOC100006752	1.2232	0.339431	2.10697	5.32278	2.41218	0.377035	0.636582	Up	0	0.0146086	0.0901317	0	0	0.014772	100006752		protein_coding
LOC100006761	2.0914	0.5956	3.5872	5.35378	2.42056	0.18629	0.439229	Up	0.0723972	0.0714556	0.146955	0.0466837	0	0	100006761	uncharacterized LOC100006761	protein_coding
LOC100006764	56.4573	69.7297	43.1849	0.623349	-0.681888	0.162904	0.407294	Down	0.173187	0.346896	0.21196	0.290685	0.429471	0.264354	100006764		protein_coding
LOC100006805	44.7278	57.5889	31.8667	0.553214	-0.854092	0.0324541	0.153735	Down	1.61954	1.10664	1.72801	2.16898	1.80065	2.90117	100006805		protein_coding
LOC100006839	8.45957	7.64239	9.27675	1.2286	0.29701	0.780394	0.897703	Up	0.0684257	0.0405215	0.319456	0.119131	0.131868	0.0409748	100006839		protein_coding
LOC100006875	129.592	161.522	97.6623	0.604007	-0.727362	0.00467053	0.0423387	Down	1.07044	0.788194	0.93121	1.46266	1.0335	1.46684	100006875		protein_coding
LOC100006889	3.72218	3.24641	4.19796	1.34227	0.424677	0.731671	0.87345	Up	0.0509988	0.0755033	0.23292	0.0493281	0.122854	0.0508988	100006889	E3 ubiquitin-protein ligase RBBP6-like	protein_coding
LOC100006895	171.164	297.97	44.3574	0.14897	-2.74691	0.000427425	0.00780302	Down	0.751453	0.133636	0.137418	0.707191	1.35359	3.66206	100006895		protein_coding
LOC100006950	4.92219	3.93531	5.90907	1.46058	0.546537	0.625205	0.814118	Up	0.211368	0.0379307	0.136514	0.1301	0.0231444	0.0767102	100006950		protein_coding
LOC100006952	46.1935	47.0925	45.2945	0.965129	-0.0512062	0.891283	0.951771	Down	0.888453	0.645265	1.02081	0.745849	0.686495	0.819788	100006952		protein_coding
LOC100007007	6.84078	9.1723	4.50925	0.502512	-0.992769	0.370181	0.630873	Down	0.045378	0.134363	0.161193	0.15362	0.35527	0.0452889	100007007		protein_coding
LOC100007049	3.89555	3.28804	4.50306	1.42969	0.515702	0.661813	0.836878	Up	0.103245	0.237773	0.174644	0.0332877	0.165809	0.103043	100007049		protein_coding
LOC100007086	50.8908	26.7626	75.0191	2.77841	1.47426	0.119432	0.339827	Up	0.985729	1.2891	0.812858	0.905765	0.103888	0.0245949	100007086		protein_coding
LOC100007100	38.071	46.1668	29.9752	0.644334	-0.63412	0.301868	0.570262	Down	0.713837	0.256201	0.675093	1.1926	0.273573	0.793394	100007100		protein_coding
LOC100007192	5.22247	4.43689	6.00805	1.39965	0.485064	0.789065	0.901505	Up	0.0100795	0.024871	0.0664944	0	0.0546324	0	100007192		protein_coding
LOC100007467	24.6916	32.9945	16.3887	0.498237	-1.0051	0.158018	0.401275	Down	0.13813	0.153375	0.0233652	0.161439	0.180239	0.1953	100007467		protein_coding
LOC100007488	857.975	913.945	802.005	0.877707	-0.188188	0.891226	0.951771	Down	53.2044	4.80891	5.01497	3.73456	39.7235	10.5741	100007488	microfibril-associated glycoprotein 4-like	protein_coding
LOC100007492	630.753	648.206	613.299	0.944692	-0.0820838	0.694632	0.854899	Down	5.90273	5.4509	6.0251	6.665	3.682	5.62988	100007492		protein_coding			dre04371,dre04261	Apelin signaling pathway|Adrenergic signaling in cardiomyocytes
LOC100007503	63.4074	70.4485	56.3662	0.7957	-0.329704	0.644232	0.826174	Down	1.26024	0.746311	0.51162	2.11714	0.239674	0.542827	100007503		protein_coding
LOC100007608	2.75995	3.44233	2.07758	0.584835	-0.773899	0.603482	0.800706	Down	0.0192043	0.00631819	0.0194909	0.0433421	0	0.0255555	100007608		protein_coding
LOC100007655	1617.28	1038.21	2196.34	2.11559	1.08106	2.62546e-07	1.86035e-05	Up	21.173	16.6111	15.5337	8.77888	6.26682	6.57023	100007655		protein_coding			dre03018	RNA degradation
LOC100007686	4.43841	5.27003	3.60679	0.691221	-0.53278	0.646077	0.827077	Down	0.013219	0.0391411	0.10733	0.0767155	0.0796099	0.0395791	100007686		protein_coding			dre00051,dre00520	Fructose and mannose metabolism|Amino sugar and nucleotide sugar metabolism
LOC100007703	334.013	438.362	229.664	0.52427	-0.931618	0.123388	0.346464	Down	6.82288	1.55282	4.13853	2.85714	7.09651	9.56533	100007703	uncharacterized LOC100007703	protein_coding	GO:0003674,GO:0005575,GO:0008150	molecular_function|cellular_component|biological_process
LOC100007727	16.9372	20.0755	13.7988	0.686074	-0.543565	0.36077	0.622344	Down	0.0400806	0.0791187	0.0858774	0.111995	0.0750964	0.0711146	100007727		protein_coding
LOC100007738	10.582	3.06054	18.1034	6.30593	2.65671	0.0288378	0.142539	Up	0.13687	0.833054	0.393585	0.0441287	0.137381	0	100007738		protein_coding
LOC100007781	1.49441	0	2.98882	14.7159	3.87931	0.106815	0.317791	Up	0.0303472	0.0149762	0.1078	0	0	0	100007781		protein_coding
LOC100007785	35.0625	8.77699	61.348	6.79374	2.76421	0.000633205	0.010178	Up	0.329454	0.990993	0.270681	0.0986333	0.00944812	0.101774	100007785		protein_coding
LOC100007824	15.8146	16.3748	15.2543	0.918332	-0.122912	0.863922	0.939582	Down	0.121717	0.180201	0.0849292	0.235459	0.0641399	0.0759238	100007824		protein_coding
LOC100007935	4.7648	9.52961	0	0.0172033	-5.86117	0.0537181	0.209833	Down	0	0	0	0.494776	0	0	100007935		protein_coding
LOC100007966	21.6905	24.9745	18.4066	0.735582	-0.443043	0.531697	0.753543	Down	0.584104	0.138362	0.735099	0.858753	0.450267	0.396411	100007966		protein_coding
LOC100007972	2.74383	3.35906	2.1286	0.622495	-0.683866	0.76921	0.891649	Down	0	0.165664	0	0.208734	0	0.0478622	100007972		protein_coding
LOC100008030	51.7063	17.5345	85.8782	5.03841	2.33297	0.00154052	0.0194014	Up	0.311607	0.743723	0.563514	0.0493198	0.177426	0.0339268	100008030		protein_coding
LOC100008366	95.1117	69.4644	120.759	1.73711	0.79669	0.0233355	0.123992	Up	0.530541	0.916373	0.779644	0.379525	0.299544	0.424703	100008366		protein_coding
LOC100141478	69.6648	69.6424	69.6872	0.995564	-0.00641462	0.988752	0.994922	Down	2.77901	4.1143	1.8295	3.05121	1.44747	3.18584	100141478		protein_coding
LOC100147849	7.44617	6.52221	8.37013	1.26915	0.343859	0.716965	0.866752	Up	0.0242712	0.0239555	0.0492668	0.0435984	0.0167052	0.00692102	100147849		protein_coding
LOC100147904	9.63437	15.0796	4.18918	0.282225	-1.82508	0.0381151	0.16968	Down	0.00975406	0.0144408	0.00989963	0.0330208	0.0528685	0.0146024	100147904		protein_coding	GO:0016020	membrane
LOC100147925	19.7519	20.8793	18.6246	0.890869	-0.166715	0.788927	0.901472	Down	0.27749	0.699917	0.938769	0.685909	0.519914	0.646205	100147925		protein_coding			dre04514	Cell adhesion molecules
LOC100147926	4.7574	4.73907	4.77572	0.98971	-0.0149218	0.989901	0.995446	Down	0.0503899	0.0248673	0.127855	0.0487391	0.0151734	0.113155	100147926		protein_coding
LOC100147937	2.59874	3.10289	2.09459	0.649387	-0.62285	0.673552	0.84263	Down	0.0478204	0.0707978	0.0485341	0.161888	0	0.0715899	100147937		protein_coding			dre04080	Neuroactive ligand-receptor interaction
LOC100148023	34.8562	33.1926	36.5197	1.11126	0.152194	0.775573	0.894973	Up	1.23835	0.707613	0.727637	0.399259	0.758865	0.845627	100148023		protein_coding
LOC100148041	2.85153	3.89296	1.8101	0.478564	-1.06322	0.514855	0.743422	Down	0	0.0133502	0.027456	0.013083	0.0488759	0.00674979	100148041		protein_coding	GO:0000166,GO:0004672,GO:0004712,GO:0004713,GO:0004715,GO:0005524,GO:0005634,GO:0005737,GO:0005886,GO:0006468,GO:0007165,GO:0016020,GO:0016301,GO:0016310,GO:0016740	nucleotide binding|protein kinase activity|protein serine/threonine/tyrosine kinase activity|protein tyrosine kinase activity|non-membrane spanning protein tyrosine kinase activity|ATP binding|nucleus|cytoplasm|plasma membrane|protein phosphorylation|signal transduction|membrane|kinase activity|phosphorylation|transferase activity
LOC100148115	118.966	106.193	131.738	1.23559	0.305205	0.592194	0.792611	Up	4.89383	1.95653	2.34721	2.916	0.646656	3.02946	100148115	cytochrome P450 2F2-like	protein_coding
LOC100148225	13.9279	27.8558	0	0.00592477	-7.39902	3.80431e-08	3.29396e-06	Down	0	0	0	0.586495	0.547761	0.583556	100148225		protein_coding	GO:0005576,GO:0005886,GO:0007339,GO:0016020,GO:0035803,GO:0035804	extracellular region|plasma membrane|binding of sperm to zona pellucida|membrane|egg coat formation|structural constituent of egg coat
LOC100148254	59.4965	66.9184	52.0745	0.772276	-0.372811	0.402078	0.657686	Down	2.02845	1.56326	1.26908	2.44578	0.836723	2.24633	100148254		protein_coding
LOC100148329	1.73496	2.86535	0.604566	0.214489	-2.22102	0.294406	0.562587	Down	0	0.0196707	0.0202273	0.057831	0.0960206	0	100148329	hairy-related 4.2-like	protein_coding	GO:0000978,GO:0000981,GO:0003677,GO:0005634,GO:0006355,GO:0006357,GO:0009952,GO:0046983,GO:0048936,GO:0050767	RNA polymerase II cis-regulatory region sequence-specific DNA binding|DNA-binding transcription factor activity, RNA polymerase II-specific|DNA binding|nucleus|regulation of DNA-templated transcription|regulation of transcription by RNA polymerase II|anterior/posterior pattern specification|protein dimerization activity|peripheral nervous system neuron axonogenesis|regulation of neurogenesis	dre04330	Notch signaling pathway
LOC100148332	78.5376	86.052	71.0232	0.823179	-0.280723	0.557364	0.770311	Down	0.49007	0.914488	0.404124	0.599926	0.396594	0.917078	100148332		protein_coding
LOC100148399	20.2896	28.0544	12.5247	0.453352	-1.1413	0.178159	0.42836	Down	0.565041	0.592549	0.322579	0.37574	1.78653	0.422949	100148399		protein_coding
LOC100148479	143.333	166.742	119.925	0.721919	-0.470092	0.144661	0.380519	Down	3.15909	2.73718	3.81811	3.07892	4.00838	4.21187	100148479		protein_coding
LOC100148510	372.205	433.548	310.862	0.718102	-0.477739	0.025029	0.129486	Down	1.52006	1.57925	1.80544	1.97097	1.85922	1.97736	100148510		protein_coding
LOC100148581	2.33073	2.27979	2.38167	1.01917	0.0273946	0.986256	0.993843	Up	0.0586132	0.0385673	0.059488	0.113386	0.0235328	0	100148581		protein_coding			dre00564,dre00565,dre00590,dre00591,dre00592,dre04010,dre04370,dre04217,dre04912,dre04270	Glycerophospholipid metabolism|Ether lipid metabolism|Arachidonic acid metabolism|Linoleic acid metabolism|alpha-Linolenic acid metabolism|MAPK signaling pathway|VEGF signaling pathway|Necroptosis|GnRH signaling pathway|Vascular smooth muscle contraction
LOC100148591	5.08696	6.03215	4.14177	0.695437	-0.524008	0.624197	0.813606	Down	0.116132	0.0163745	0.101027	0.0641872	0.0999133	0.115904	100148591		protein_coding			dre04217	Necroptosis
LOC100148620	24.6939	25.769	23.6188	0.908406	-0.138591	0.779843	0.897372	Down	0.531474	0.599499	0.873323	0.88125	0.426766	0.606206	100148620		protein_coding
LOC100148648	2.34325	2.87539	1.81111	0.619018	-0.691947	0.736787	0.876644	Down	0.0202892	0.100127	0	0.156996	0.0244379	0	100148648		protein_coding
LOC100148665	64.0039	106.329	21.6788	0.204533	-2.2896	0.0250334	0.129486	Down	0.0816228	0.342385	0.310654	0.217109	2.33493	0.183291	100148665		protein_coding
LOC100148704	1223.24	1560.87	885.611	0.567102	-0.81832	9.17912e-07	5.59434e-05	Down	6.47267	6.63043	6.56254	11.6498	7.7164	10.5727	100148704		protein_coding	GO:0003950,GO:0016740,GO:0016757,GO:0016763	NAD+ ADP-ribosyltransferase activity|transferase activity|glycosyltransferase activity|pentosyltransferase activity
LOC100148735	1.51142	0	3.02283	14.8748	3.8948	0.182915	0.434388	Up	0	0.122779	0.126253	0	0	0	100148735		protein_coding
LOC100148950	4.29434	2.06525	6.52344	3.09334	1.62917	0.15384	0.39475	Up	0.0477258	0.0141315	0.0435943	0.0138487	0.00574848	0.00952643	100148950		protein_coding
LOC100148951	9.59859	2.88836	16.3088	5.32497	2.41277	0.0107852	0.0736189	Up	0.358456	0.170345	0.202114	0.0513649	0	0.0662504	100148951		protein_coding
LOC100149007	253.974	305.049	202.899	0.665534	-0.587416	0.0230855	0.123248	Down	1.64331	2.02552	1.56605	2.14169	1.97005	2.61028	100149007		protein_coding
LOC100149015	14.5615	9.67898	19.444	2.03553	1.02541	0.091184	0.289095	Up	0.201312	0.257133	0.312484	0.103086	0.114107	0.106368	100149015		protein_coding
LOC100149080	41.1479	31.4788	50.817	1.59031	0.669306	0.207683	0.46628	Up	0.517909	0.607019	0.711803	0.615742	0.142957	0.269215	100149080		protein_coding			dre00562,dre04310,dre04371,dre04020,dre04070,dre04540,dre04621,dre04912,dre04916,dre04261,dre04270	Inositol phosphate metabolism|Wnt signaling pathway|Apelin signaling pathway|Calcium signaling pathway|Phosphatidylinositol signaling system|Gap junction|NOD-like receptor signaling pathway|GnRH signaling pathway|Melanogenesis|Adrenergic signaling in cardiomyocytes|Vascular smooth muscle contraction
LOC100149084	3.1039	4.43689	1.77091	0.407935	-1.29359	0.584449	0.788402	Down	0.015632	0.00771435	0	0	0.042364	0	100149084		protein_coding
LOC100149229	2.53366	3.24641	1.82091	0.57227	-0.805232	0.622039	0.812677	Down	0	0.159284	0.0327582	0.0624383	0.155506	0.0644263	100149229		protein_coding
LOC100149241	315.171	320.645	309.696	0.965391	-0.0508154	0.905234	0.958413	Down	2.12648	6.42604	4.95591	4.83734	3.19373	4.15292	100149241		protein_coding
LOC100149327	4.9547	7.55713	2.35228	0.309185	-1.69346	0.319746	0.586993	Down	0.0714523	0.0235077	0	0.0691116	0	0.202051	100149327		protein_coding
LOC100149425	66.6885	80.8752	52.5018	0.645704	-0.631055	0.244384	0.508175	Down	0.300885	0.3064	0.232667	0.757597	0.195586	0.214496	100149425		protein_coding
LOC100149482	39.0309	49.1276	28.9341	0.594365	-0.750578	0.100562	0.306855	Down	0.114143	0.0985758	0.133947	0.117303	0.189038	0.181558	100149482		protein_coding			dre04020,dre04080	Calcium signaling pathway|Neuroactive ligand-receptor interaction
LOC100149554	38.8513	37.7327	39.9698	1.06667	0.0931094	0.834754	0.92617	Up	0.523516	0.505714	0.4635	0.506366	0.442737	0.244569	100149554		protein_coding
LOC100149563	62.3207	60.5415	64.1	1.05297	0.0744626	0.860316	0.938177	Up	2.10096	1.61283	2.57654	2.76596	1.19499	1.25228	100149563	uncharacterized LOC100149563	protein_coding
LOC100149641	6.14532	9.31161	2.97903	0.315399	-1.66475	0.127896	0.353433	Down	0.0430811	0.0141736	0.0874481	0.166679	0.0345936	0.200651	100149641		protein_coding	GO:0003924,GO:0005525	GTPase activity|GTP binding	dre04621	NOD-like receptor signaling pathway
LOC100149643	133.409	133.328	133.489	1.0024	0.00346063	0.989461	0.995289	Up	0.772995	0.868175	0.741247	0.66517	0.59074	0.776799	100149643		protein_coding
LOC100149647	6.90508	0	13.8102	68.0611	6.08876	0.000507136	0.00875805	Up	2.14254	0.192243	0.724838	0	0	0	100149647		protein_coding
LOC100149676	1.34828	0	2.69657	13.2755	3.7307	0.218837	0.479596	Up	0.0540756	0.106745	0	0	0	0	100149676		protein_coding
LOC100149761	15.9353	7.64677	24.2238	3.0639	1.61537	0.0673883	0.24155	Up	1.32918	1.88913	1.07922	0.617106	0	0.636755	100149761		protein_coding
LOC100149889	27.0681	28.5131	25.6232	0.890964	-0.166561	0.726316	0.870355	Down	0.711262	0.491408	0.84219	0.894349	0.42835	0.662542	100149889		protein_coding
LOC100149991	64.1102	72.0475	56.1729	0.775439	-0.366915	0.49312	0.728976	Down	0.721146	0.53178	0.311271	1.06633	0.299519	0.430184	100149991		protein_coding
LOC100150003	24.511	24.1823	24.8398	1.04177	0.0590382	0.916605	0.963748	Up	0.220662	0.316788	0.295213	0.242537	0.302026	0.130135	100150003		protein_coding
LOC100150095	3.18035	4.55319	1.80751	0.392246	-1.35017	0.297022	0.565176	Down	0.0109189	0.0431076	0.0110819	0.0422448	0.0263032	0.0762823	100150095		protein_coding
LOC100150142	9.87521	9.10639	10.644	1.16064	0.214916	0.797526	0.906035	Up	0.550455	0.232841	0.15962	0.202827	0.126288	0.36625	100150142		protein_coding
LOC100150229	143.255	121.022	165.489	1.36266	0.446421	0.0829112	0.273495	Up	3.05013	2.53261	3.39047	2.29461	1.39955	1.98111	100150229		protein_coding
LOC100150236	4.07329	6.64418	1.50241	0.224358	-2.15613	0.329871	0.596075	Down	0	0	0.0611658	0.22151	0.0290359	0	100150236		protein_coding
LOC100150296	141.284	138.54	144.028	1.04223	0.0596769	0.8073	0.911249	Up	3.26339	2.77197	3.5329	2.73562	2.40606	2.68454	100150296		protein_coding
LOC100150424	1042.05	54.7337	2029.38	37.0173	5.21013	0.00293175	0.0303827	Up	0.483454	30.7176	105.637	3.02002	0.121315	0.361879	100150424		protein_coding
LOC100150565	3.8581	3.56722	4.14897	1.12874	0.174719	0.892506	0.952134	Up	0.298018	0.126061	0.172838	0.164717	0	0.297434	100150565		protein_coding
LOC100150619	12.0379	14.3936	9.6823	0.663809	-0.59116	0.620985	0.812351	Down	0.0341022	0.403905	0.103834	0.544254	0.0205377	0.204212	100150619	gastrula zinc finger protein XlCGF8.2DB-like	protein_coding
LOC100150651	12.3695	8.65137	16.0877	1.86154	0.896496	0.147208	0.384246	Up	0.191662	0.151335	0.17507	0.0926915	0.0692558	0.0765143	100150651		protein_coding
LOC100150670	7.76511	8.41821	7.11201	0.830804	-0.267419	0.767268	0.891	Down	0.208832	0.0858818	0.123637	0.151493	0.0419224	0.24316	100150670		protein_coding
LOC100150676	5.37167	1.42802	9.31532	6.52025	2.70493	0.133935	0.363278	Up	0.16292	0.00518713	0	0.0101666	0.00633012	0.00524517	100150676		protein_coding
LOC100150699	12.8762	15.2784	10.474	0.696493	-0.52182	0.488265	0.725729	Down	0.0893799	0.144356	0.0494803	0.0785926	0.156591	0.105424	100150699		protein_coding
LOC100150834	6.14975	8.09175	4.20775	0.513801	-0.960719	0.457097	0.703258	Down	0.0464391	0.137505	0.471322	0.224589	0.055935	0.834263	100150834		protein_coding
LOC100150882	463.734	277.99	649.478	2.33406	1.22284	0.0571017	0.217996	Up	36.3303	9.06887	21.1971	6.49011	2.51197	15.8068	100150882		protein_coding
LOC100151028	10.1782	6.44261	13.9137	2.08917	1.06293	0.227218	0.490482	Up	0.422226	0.166694	0.205693	0.196029	0.0203425	0.117991	100151028		protein_coding
LOC100151049	3440.11	3717.06	3163.17	0.851162	-0.232494	0.286605	0.555103	Down	125.567	130.208	147.877	123.147	129.421	148.759	100151049	lysosomal-associated protein transmembrane 5	protein_coding
LOC100151078	6.83571	7.42786	6.24356	0.863357	-0.21197	0.803808	0.909313	Down	0.124631	0.0820069	0.0843275	0.0803656	0.133436	0.0691037	100151078		protein_coding
LOC100151089	1.95825	0.976662	2.93984	2.87116	1.52163	0.384116	0.642065	Up	0.144103	0.0203184	0.0417867	0.0199117	0	0.0410914	100151089		protein_coding
LOC100151145	2.72403	2.45562	2.99243	1.27266	0.347851	0.798095	0.906249	Up	0.0436473	0.0430797	0.132896	0.0211087	0.0788585	0.0435617	100151145		protein_coding
LOC100151196	3072.9	3434.12	2711.68	0.78977	-0.340496	0.346282	0.611828	Down	20.6592	33.3946	40.967	27.434	38.9351	34.1448	100151196		protein_coding			dre04144	Endocytosis
LOC100151333	99.4133	120.268	78.5584	0.656735	-0.606616	0.0467002	0.19242	Down	0.860025	0.962709	0.936728	1.10575	1.2759	1.17236	100151333		protein_coding
LOC100151335	258.023	325.229	190.818	0.585301	-0.772751	0.00948727	0.0676588	Down	3.03452	3.91925	4.11815	7.69838	3.52971	5.36489	100151335		protein_coding
LOC100151490	1.60092	0.790788	2.41106	3.16748	1.66334	0.445786	0.694728	Up	0	0.0516222	0.159249	0.0252945	0.0314986	0	100151490		protein_coding
LOC100151503	35.6058	35.666	35.5457	0.991896	-0.0117393	0.986685	0.994025	Down	0.0495536	0.225734	0.174092	0.239651	0.091825	0.0722823	100151503		protein_coding
LOC100151603	2.1383	3.38134	0.895251	0.259846	-1.94427	0.197952	0.454192	Down	0.0128223	0.0126556	0.0130137	0.0496091	0.0154443	0.0639859	100151603		protein_coding
LOC100216314	6.76948	7.11709	6.42187	0.910563	-0.13517	0.939641	0.974721	Down	4.72185	0.466044	0	2.05522	2.55932	0	100216314	chemokine CCL-CUj	protein_coding
LOC100301575	7.99421	11.1751	4.81334	0.423374	-1.23999	0.254978	0.520373	Down	0.105835	0.365603	0.375949	1.43314	0.191213	0.211254	100301575	novel rhamnose binding lectin-like	protein_coding
LOC100329231	17.8702	21.31	14.4303	0.674627	-0.567838	0.70004	0.857644	Down	0	0.0429133	1.01493	0.441571	0.0785539	0.867868	100329231		protein_coding	GO:0000166,GO:0004672,GO:0004674,GO:0005524,GO:0005737,GO:0006468,GO:0007346,GO:0016301,GO:0016310,GO:0016740,GO:0043066,GO:0046777	nucleotide binding|protein kinase activity|protein serine/threonine kinase activity|ATP binding|cytoplasm|protein phosphorylation|regulation of mitotic cell cycle|kinase activity|phosphorylation|transferase activity|negative regulation of apoptotic process|protein autophosphorylation
LOC100329294	100.796	109.276	92.3169	0.842283	-0.247623	0.774858	0.8944	Down	3.96715	5.51374	15.6124	17.3848	0.682621	9.45399	100329294	uncharacterized LOC100329294	protein_coding
LOC100329344	500.56	570.998	430.122	0.754638	-0.406144	0.0964603	0.299447	Down	9.44644	9.15807	8.26371	9.4073	10.7272	9.85559	100329344		protein_coding
LOC100329375	799.084	713.784	884.384	1.23815	0.308184	0.403799	0.65886	Up	63.1689	33.28	30.8429	43.1412	18.3017	28.498	100329375		protein_coding	GO:0001530,GO:0001971,GO:0032496,GO:0050829	lipopolysaccharide binding|negative regulation of activation of membrane attack complex|response to lipopolysaccharide|defense response to Gram-negative bacterium
LOC100329433	6.33921	11.1616	1.51682	0.135347	-2.88526	0.0195028	0.10984	Down	0	0.118584	0.0304849	0.174316	0.289429	0.479644	100329433		protein_coding
LOC100329477	15.3148	17.9672	12.6623	0.714461	-0.485074	0.58842	0.790553	Down	0.0416634	0.1919	0.0563802	0.080597	0.192367	0.0623724	100329477		protein_coding
LOC100329480	8.13068	10.3745	5.88689	0.566974	-0.818644	0.496051	0.730905	Down	0.287855	0.0811745	0.0417358	0.0397749	0.0990614	0.471976	100329480		protein_coding
LOC100329486	181.018	101.773	260.263	2.54964	1.35029	0.123452	0.346464	Up	1.35376	0.256342	0.424552	0.469076	0.0166103	0.243153	100329486		protein_coding
LOC100329520	14.405	28.81	0	0.00571312	-7.45151	0.0566974	0.216937	Down	0	0	0	0.0143856	0	1.24686	100329520		protein_coding			dre04350,dre04060	TGF-beta signaling pathway|Cytokine-cytokine receptor interaction
LOC100329560	4.39072	5.27003	3.51142	0.675472	-0.566033	0.659841	0.835687	Down	0.17901	0.0176682	0.0181681	0.103887	0.107807	0.0535975	100329560		protein_coding
LOC100329627	172.042	202.088	141.995	0.704457	-0.505416	0.0739894	0.255507	Down	4.14248	2.70302	4.15759	4.47423	4.35198	4.38701	100329627		protein_coding
LOC100329650	1.66267	0.976662	2.34868	2.30275	1.20336	0.515867	0.743939	Up	0.0887286	0.0145958	0.0150088	0.0143036	0	0.0295182	100329650		protein_coding
LOC100329723	3.84766	5.29304	2.40228	0.443963	-1.17149	0.348923	0.613443	Down	0.0424136	0.104655	0.0215233	0.143584	0.0255432	0.169321	100329723		protein_coding
LOC100329795	97.0669	67.0515	127.082	1.90917	0.932943	0.115513	0.332831	Up	2.50901	0.891496	0.916723	0.533899	0.94288	0.360588	100329795		protein_coding
LOC100329806	52.5987	84.4606	20.7368	0.245461	-2.02644	0.50094	0.734411	Down	0	0.0192169	1.34373	0.640298	0	4.25559	100329806		protein_coding
LOC100329825	4.31141	2.76274	5.86009	2.23923	1.163	0.475528	0.716862	Up	0.36474	0.0449995	0.0462729	0.0220494	0.137288	0	100329825		protein_coding
LOC100329833	77.9584	85.8666	70.0502	0.810725	-0.302716	0.421073	0.674652	Down	0.387257	0.58273	0.515458	0.657034	0.305865	0.639938	100329833		protein_coding
LOC100329844	20.613	22.7041	18.522	0.816548	-0.292391	0.582665	0.787214	Down	0.458643	0.477827	0.646511	0.764009	0.521736	0.381453	100329844		protein_coding
LOC100329848	38.0763	51.5984	24.5541	0.477577	-1.0662	0.313327	0.580886	Down	0.259483	0.0280667	0.0108228	0.0550098	0.226914	0.216403	100329848		protein_coding
LOC100329917	5.54732	8.0744	3.02024	0.380206	-1.39515	0.228256	0.491352	Down	0.0192591	0.13306	0.0390931	0.111769	0.231972	0.0768853	100329917		protein_coding
LOC100330084	9.16377	9.95177	8.37576	0.837198	-0.25636	0.788269	0.901388	Down	0.229322	0.352083	0.129302	0.0985818	0.122761	0.508603	100330084		protein_coding
LOC100330143	137.868	120.02	155.716	1.29833	0.376655	0.161056	0.404676	Up	2.18972	2.02692	2.24751	1.8308	1.29638	1.14827	100330143		protein_coding
LOC100330151	5.49363	3.82266	7.1646	1.95688	0.968553	0.427477	0.680079	Up	0.151009	0.127753	0.240841	0	0.129919	0.0861213	100330151		protein_coding
LOC100330159	179.514	136.182	222.846	1.62947	0.704401	0.0470638	0.193412	Up	1.48297	1.79068	2.61792	1.38098	0.617572	1.16515	100330159		protein_coding
LOC100330186	223.701	264.008	183.395	0.696687	-0.521418	0.188714	0.442513	Down	0.996736	1.27386	1.65359	1.25454	2.07018	1.33275	100330186		protein_coding
LOC100330188	43.4498	56.4317	30.468	0.539635	-0.889945	0.308963	0.576728	Down	0.0557346	0.605107	0.749504	1.28033	0.738443	0.26422	100330188		protein_coding
LOC100330229	2.3755	2.06525	2.68575	1.27528	0.350817	0.785783	0.900161	Up	0.0636604	0.0628325	0.0646105	0.0615749	0.0255592	0.042357	100330229		protein_coding
LOC100330250	3.26773	3.8327	2.70276	0.696074	-0.522687	0.653922	0.83201	Down	0.0931344	0.229808	0.0945244	0.225208	0.112179	0.185903	100330250		protein_coding
LOC100330349	33.4148	18.7824	48.0471	2.53863	1.34405	0.0329358	0.155298	Up	0.702204	1.73268	0.506381	0.464716	0.222576	0.33197	100330349		protein_coding
LOC100330441	1.18279	0.2978	2.06779	5.23606	2.38848	0.280627	0.54861	Up	0.115226	0.0284319	0.0584728	0.0278628	0	0	100330441		protein_coding
LOC100330530	17.5542	22.1631	12.9454	0.583994	-0.775974	0.318647	0.585908	Down	0.0444812	0.219513	0.376209	0.344192	0.285742	0.310757	100330530		protein_coding
LOC100330546	2.34986	2.30207	2.39766	1.05943	0.083295	0.955864	0.980346	Up	0.0193142	0.019063	0.117615	0.0186815	0.0465271	0.0578289	100330546		protein_coding
LOC100330554	134.203	155.435	112.971	0.724462	-0.465018	0.287336	0.555782	Down	1.1226	0.935646	1.09716	1.27886	0.540861	1.99182	100330554		protein_coding			dre04080	Neuroactive ligand-receptor interaction
LOC100330563	27.4278	23.1224	31.7332	1.38628	0.471223	0.509833	0.74057	Up	0.554013	0.944486	0.272621	0.422196	0.505529	0.150798	100330563		protein_coding
LOC100330575	460.256	267.153	653.36	2.44108	1.28752	0.0241636	0.126561	Up	8.24472	6.82226	3.77815	3.05181	0.528113	3.35491	100330575		protein_coding
LOC100330644	101.26	97.6073	104.913	1.07911	0.109845	0.721328	0.868065	Up	0.887114	0.674624	1.00367	0.625956	0.648113	0.74023	100330644		protein_coding
LOC100330650	2.53355	0.637231	4.42986	6.38762	2.67528	0.1031	0.310945	Up	0.136685	0.0449692	0.0462417	0.0146897	0	0.0151574	100330650		protein_coding			dre04080	Neuroactive ligand-receptor interaction
LOC100330743	8.39257	12.9268	3.85829	0.293715	-1.76751	0.0673545	0.241472	Down	0.0929634	0.0458772	0.0629006	0.344686	0.0373242	0.231953	100330743		protein_coding
LOC100330744	108.705	127.771	89.6393	0.704139	-0.506067	0.46834	0.710553	Down	1.53042	1.5673	0.350359	0.745705	2.28687	0.895776	100330744		protein_coding
LOC100330746	25.6195	14.723	36.5161	2.42641	1.27882	0.0608287	0.226853	Up	1.18742	1.93218	0.781713	0.86915	0.154619	0.416383	100330746	secretogranin V-like	protein_coding
LOC100330805	6.38325	10.0441	2.72235	0.269573	-1.89125	0.177275	0.427388	Down	0	0.136678	0.112437	0.562559	0.233514	0.0276415	100330805		protein_coding
LOC100330838	55.2423	58.3178	52.1668	0.897238	-0.156437	0.713459	0.865327	Down	1.75798	0.78869	0.973209	1.27529	1.05873	0.996893	100330838		protein_coding
LOC100330861	6.56426	2.44631	10.6822	4.29225	2.10173	0.0373496	0.167692	Up	0.187889	0.0695419	0.166856	0.0227167	0.0141443	0.04688	100330861		protein_coding
LOC100330864	1122.38	1610.59	634.173	0.393743	-1.34467	2.17612e-05	0.000754019	Down	13.7535	11.0158	6.40705	25.4441	18.0654	24.5878	100330864	ribonucleotide reductase regulatory subunit M2	protein_coding			dre00230,dre00240,dre00480,dre00983,dre04115	Purine metabolism|Pyrimidine metabolism|Glutathione metabolism|Drug metabolism - other enzymes|p53 signaling pathway
LOC100330916	8.78115	5.6741	11.8882	2.05541	1.03943	0.344614	0.610544	Up	0.017049	0.0151445	0.00173034	0.00494714	0.00102676	0.00850776	100330916		protein_coding
LOC100330978	3.59405	5.09712	2.09098	0.41864	-1.25622	0.2917	0.559687	Down	0.0111185	0.0109739	0.0169266	0.0107542	0.0334799	0.0332899	100330978		protein_coding
LOC100331003	1.88281	1.66484	2.10078	1.31804	0.398396	0.815835	0.914546	Up	0.0206364	0.0407361	0.0837777	0	0.0497124	0.0411919	100331003		protein_coding
LOC100331045	126.922	112.322	141.521	1.262	0.335714	0.832307	0.924743	Up	3.0048	4.00252	4.56207	0.118145	6.4734	0.170669	100331045		protein_coding
LOC100331049	7.99886	5.64178	10.3559	1.82246	0.865888	0.30199	0.570337	Up	0.477991	0.173811	0.229796	0.145999	0.0909047	0.175756	100331049		protein_coding
LOC100331050	12.4663	11.6769	13.2556	1.1421	0.191687	0.87156	0.94332	Up	0.00723248	0.0535381	0.0990957	0.00349777	0.0435569	0.0685737	100331050		protein_coding
LOC100331067	3.54543	4.4283	2.66256	0.593191	-0.753432	0.509842	0.74057	Down	0.12049	0.0475691	0.0489152	0.16316	0.058051	0.0962026	100331067		protein_coding
LOC100331115	2.78087	3.46095	2.10078	0.615835	-0.699384	0.654365	0.832048	Down	0.0296411	0.0585112	0.120334	0.14335	0.142809	0	100331115		protein_coding
LOC100331140	28.5239	39.2294	17.8184	0.451587	-1.14693	0.184997	0.437304	Down	0.56234	0.308348	0.380488	0.785659	0.0752586	1.60056	100331140		protein_coding
LOC100331190	9.82812	13.074	6.58222	0.497581	-1.007	0.305165	0.573212	Down	0.0512116	0.0379092	0.194909	0.185752	0.0462625	0.268333	100331190	metabotropic glutamate receptor 7	protein_coding			dre04080	Neuroactive ligand-receptor interaction
LOC100331214	45.0686	58.0417	32.0956	0.549483	-0.863854	0.272695	0.540061	Down	0.306073	0.61732	0.499727	1.28716	0.0801433	1.00939	100331214		protein_coding			dre00561,dre03320	Glycerolipid metabolism|PPAR signaling pathway
LOC100331219	1.94723	0.935031	2.95943	2.95194	1.56167	0.354381	0.617828	Up	0.0818652	0.0161601	0.0664696	0.0316733	0	0.0163409	100331219		protein_coding
LOC100331278	7.5523	6.15412	8.95048	1.43345	0.519491	0.577387	0.783495	Up	0.0578723	0.0285598	0.132156	0.0699705	0.0261397	0.0360992	100331278		protein_coding
LOC100331287	24.2163	4.93133	43.5013	8.2948	3.05221	0.00021835	0.00470344	Up	0.426169	0.413497	0.212599	0.0838388	0	0.0288361	100331287		protein_coding
LOC100331291	32.2295	31.9331	32.5259	1.00499	0.00717894	0.987777	0.994577	Up	0.279082	0.267801	0.298983	0.382415	0.130725	0.224375	100331291		protein_coding
LOC100331300	8.00266	13.9473	2.05799	0.148761	-2.74893	0.00876839	0.0641054	Down	0.0708079	0.0139774	0.0143729	0.109581	0.153516	0.29681	100331300		protein_coding
LOC100331324	71.1474	74.9326	67.3623	0.894022	-0.161617	0.719554	0.867404	Down	2.14419	1.2313	1.04853	1.8854	0.727833	1.71198	100331324		protein_coding	GO:0004197,GO:0005737,GO:0006508,GO:0006915,GO:0008233,GO:0008234,GO:0016787	cysteine-type endopeptidase activity|cytoplasm|proteolysis|apoptotic process|peptidase activity|cysteine-type peptidase activity|hydrolase activity	dre04210,dre04623,dre05132	Apoptosis|Cytosolic DNA-sensing pathway|Salmonella infection
LOC100331367	475.913	467.983	483.842	1.03253	0.0461771	0.818157	0.915731	Up	16.0181	14.1883	14.2563	15.8641	9.56429	11.8055	100331367		protein_coding
LOC100331378	1.94606	0.5956	3.29651	4.93533	2.30315	0.225094	0.488126	Up	0.0440172	0.0651672	0.134022	0.0425752	0	0	100331378		protein_coding
LOC100331381	3.64068	2.80509	4.47626	1.51722	0.60143	0.629808	0.817313	Up	0.0246865	0.0243654	0.0250549	0.0286533	0	0.0147828	100331381		protein_coding			dre04080	Neuroactive ligand-receptor interaction
LOC100331404	54.1357	79.7682	28.5031	0.356896	-1.48643	0.115287	0.332654	Down	0.0315084	1.1973	0.23984	1.69143	0.94878	1.02201	100331404		protein_coding
LOC100331417	7.45965	5.85339	9.06591	1.52108	0.605097	0.698013	0.856231	Up	0.0314643	0.527937	0.383207	0.547804	0.0378982	0	100331417		protein_coding
LOC100331484	430.605	509.752	351.459	0.689001	-0.537423	0.0112618	0.0758943	Down	11.6035	10.5352	13.2374	15.7766	11.376	16.9672	100331484	immediate early response 2-like	protein_coding
LOC100331492	591.92	591.87	591.971	1.00009	0.00012798	0.999765	0.999814	Up	2.84283	3.93954	1.31148	3.20997	2.03077	1.78915	100331492		protein_coding
LOC100331497	1.35803	0.2978	2.41827	6.10651	2.61035	0.306315	0.574056	Up	0	0.115102	0.11836	0.0281997	0	0	100331497	U2 small nuclear ribonucleoprotein auxiliary factor 35 kDa subunit-related protein 1-like	protein_coding
LOC100331510	16.7829	13.5053	20.0604	1.4973	0.582361	0.396492	0.653098	Up	0.263531	0.419056	0.297182	0.0849659	0.176343	0.292237	100331510		protein_coding
LOC100331538	64.193	61.3425	67.0434	1.08486	0.117508	0.749718	0.882706	Up	1.2388	0.89767	1.40052	1.27405	0.585512	0.970315	100331538		protein_coding
LOC100331609	100.566	130.907	70.226	0.537703	-0.895118	0.0308939	0.148794	Down	0.703581	0.757561	1.04948	1.71164	1.47662	0.776676	100331609		protein_coding
LOC100331639	7239.96	8112.62	6367.3	0.784868	-0.349477	0.216531	0.47626	Down	91.2899	131.632	169.941	164.792	127.635	137.043	100331639		protein_coding
LOC100331676	10.9515	10.774	11.1291	1.03333	0.0472976	0.961772	0.982694	Up	0.0786975	0.271859	0.379392	0.361567	0.213277	0.0392715	100331676		protein_coding
LOC100331692	115.926	126.355	105.497	0.831424	-0.266343	0.448006	0.696023	Down	3.03497	2.84244	1.95608	3.29981	1.60097	3.31643	100331692		protein_coding
LOC100331694	1139.62	1225.93	1053.32	0.858789	-0.219624	0.388219	0.646098	Down	10.8118	12.5543	14.671	17.756	9.65982	11.1563	100331694		protein_coding
LOC100331704	45.5921	53.9253	37.2589	0.69048	-0.534329	0.186364	0.43924	Down	0.294041	0.23745	0.305212	0.49125	0.305871	0.246776	100331704		protein_coding
LOC100331720	10.3802	7.62742	13.1329	1.68087	0.749205	0.398301	0.654662	Up	0.360601	0.422644	0.205865	0.174394	0.027146	0.314906	100331720		protein_coding
LOC100331743	217.339	138.146	296.532	2.13998	1.0976	0.00389341	0.0374668	Up	22.2657	13.1636	20.3325	12.2525	5.17551	5.34664	100331743		protein_coding
LOC100331776	2.88708	3.66618	2.10799	0.56687	-0.818909	0.609052	0.804552	Down	0.0154868	0.0611415	0.0314359	0.134815	0.0373071	0	100331776		protein_coding
LOC100331810	50.0838	48.0339	52.1338	1.08508	0.117801	0.84532	0.931168	Up	0.671865	2.95644	1.19331	1.51633	1.14643	1.2014	100331810		protein_coding
LOC100331830	8.34868	12.8071	3.89027	0.305413	-1.71117	0.163143	0.40762	Down	0.10048	0.0495865	0.509897	0.0971881	0.665643	1.00283	100331830		protein_coding
LOC100331876	3.32491	3.63679	3.01304	0.861841	-0.214506	0.892462	0.952134	Down	0.0149122	0.0735913	0.060539	0	0.107769	0.0297659	100331876		protein_coding			dre00532	Glycosaminoglycan biosynthesis - chondroitin sulfate / dermatan sulfate
LOC100331909	31.3377	42.9082	19.7673	0.463932	-1.10801	0.157528	0.40041	Down	0.549369	0.591517	2.17958	0.869518	3.00775	1.8941	100331909		protein_coding
LOC100331938	2.39176	0.935031	3.84849	3.80574	1.92818	0.211015	0.470612	Up	0.0657381	0.0278071	0.0285939	0.018167	0	0.00937273	100331938		protein_coding			dre04350,dre04060	TGF-beta signaling pathway|Cytokine-cytokine receptor interaction
LOC100331996	33.5815	52.9132	14.2498	0.269269	-1.89288	0.0221335	0.120034	Down	0.22841	0.096617	0.198702	1.09412	0.510929	0.0868427	100331996		protein_coding
LOC100332023	26.4817	28.2469	24.7166	0.873435	-0.195227	0.651947	0.831125	Down	0.628116	0.484333	0.517961	0.607539	0.425561	0.568113	100332023		protein_coding
LOC100332035	3.47662	2.52957	4.42367	1.74544	0.80359	0.616361	0.810026	Up	0.0682597	0.0269488	0.00692784	0	0.00822174	0.0408754	100332035		protein_coding
LOC100332095	1040.02	1106.62	973.411	0.880154	-0.184172	0.357851	0.619867	Down	5.81827	6.21103	7.08851	6.77814	5.94233	5.77762	100332095		protein_coding
LOC100332173	68.7598	52.7739	84.7457	1.60193	0.67981	0.0951179	0.296982	Up	5.0274	3.50972	3.11124	1.81857	1.4277	2.97789	100332173		protein_coding
LOC100332177	196.471	211.539	181.403	0.857846	-0.22121	0.558485	0.770788	Down	4.13015	1.81026	2.38546	3.65318	2.47098	2.1695	100332177		protein_coding
LOC100332187	22.1719	9.64739	34.6964	3.55148	1.82842	0.0114744	0.0768041	Up	0.452664	0.39093	1.35912	0.273647	0.113589	0.150592	100332187		protein_coding			dre04080	Neuroactive ligand-receptor interaction
LOC100332191	1.29328	0.492987	2.09357	5.29198	2.40381	0.373448	0.633908	Up	0.00720624	0	0.0438827	0	0.00867977	0	100332191		protein_coding
LOC100332221	527.839	699.667	356.011	0.509468	-0.972938	0.00759187	0.058556	Down	11.5582	15.9849	14.2623	17.5339	29.7051	20.6518	100332221		protein_coding
LOC100332293	111.27	158.36	64.1808	0.404286	-1.30655	0.00142613	0.0182527	Down	1.46854	0.941388	0.860468	2.53334	1.24	3.26373	100332293		protein_coding			dre04140,dre04136	Autophagy - animal|Autophagy - other
LOC100332300	4.61242	7.12147	2.10337	0.292152	-1.77521	0.305899	0.573896	Down	0	0	0.168675	0.275571	0.0285969	0.213259	100332300		protein_coding			dre04350	TGF-beta signaling pathway
LOC100332323	57.9925	53.3173	62.6678	1.1691	0.2254	0.731432	0.873368	Up	0.590289	0.987203	1.86386	0.808847	0.276496	1.50555	100332323		protein_coding
LOC100332329	1374.37	1835.4	913.332	0.497846	-1.00623	0.00637945	0.0524652	Down	3.18303	4.71445	4.50954	5.16271	8.96533	6.47528	100332329		protein_coding
LOC100332351	297.017	325.569	268.465	0.826293	-0.275275	0.379218	0.638567	Down	6.7816	9.61996	9.95177	7.78046	9.83025	9.22949	100332351		protein_coding
LOC100332358	4.00721	4.99158	3.02283	0.604151	-0.727018	0.616072	0.809751	Down	0	0.146022	0.150154	0.257578	0.142558	0.0295311	100332358		protein_coding
LOC100332369	21.5276	25.6923	17.3628	0.671158	-0.575276	0.288677	0.557007	Down	0.231581	0.326528	0.402921	0.41599	0.259011	0.561308	100332369		protein_coding
LOC100332428	281.765	370.566	192.963	0.520708	-0.941453	0.0176842	0.103085	Down	0.993499	2.06622	2.65586	3.77517	2.8741	2.78873	100332428		protein_coding
LOC100332443	10.9025	7.22336	14.5817	2.02268	1.01627	0.127573	0.35293	Up	0.277528	0.205439	0.197169	0.107374	0.0835691	0.096944	100332443		protein_coding
LOC100332446	469.48	445.877	493.083	1.10442	0.143288	0.769799	0.89213	Up	17.2725	14.0362	15.0585	14.6488	3.57418	19.1385	100332446	uncharacterized LOC100332446	protein_coding
LOC100332459	58.4236	66.6917	50.1556	0.751903	-0.411382	0.41915	0.672493	Down	2.07508	2.63326	0.802304	2.07082	1.70593	2.53123	100332459		protein_coding
LOC100332483	3.11154	2.33439	3.88869	1.61804	0.694246	0.63581	0.820581	Up	0.0867898	0.128492	0.0660638	0.0209866	0	0.129929	100332483		protein_coding
LOC100332501	2.42418	0.976662	3.87169	3.73193	1.89992	0.20375	0.461343	Up	0.0305035	0.0240854	0.024767	0.00590083	0	0.0121774	100332501		protein_coding
LOC100332505	15.3247	30.6494	0	0.00533678	-7.54982	5.4908e-08	4.58942e-06	Down	0	0	0	0.611292	0.182694	0.365838	100332505	uncharacterized LOC100332505	protein_coding	GO:0003674,GO:0005575,GO:0008150	molecular_function|cellular_component|biological_process
LOC100332526	37.0459	42.8576	31.2343	0.728657	-0.456688	0.539718	0.758333	Down	0.217324	0.536243	0.374964	0.136633	0.314114	0.867589	100332526		protein_coding			dre04144	Endocytosis
LOC100332538	10.0452	7.84762	12.2428	1.55843	0.640091	0.404327	0.659209	Up	0.131249	0.139507	0.143454	0.126949	0.072963	0.0302287	100332538		protein_coding
LOC100332583	47.5107	30.2112	64.8103	2.12749	1.08915	0.0777345	0.263159	Up	0.461518	0.393751	0.849482	0.189152	0.0847967	0.421578	100332583		protein_coding
LOC100332608	125.573	55.5485	195.598	3.5209	1.81595	0.00860297	0.063554	Up	0.727787	1.07748	4.84225	0.75283	0.487003	0.383356	100332608		protein_coding
LOC100332609	8.51949	4.43689	12.6021	2.96897	1.56996	0.313403	0.580899	Up	0.427357	0.843599	1.30121	0	0.661813	0	100332609		protein_coding			dre00350	Tyrosine metabolism
LOC100332698	16.4856	23.1162	9.85497	0.421479	-1.24647	0.153523	0.394411	Down	0.0892081	0.104057	0.0740778	0.243169	0.0195363	0.307569	100332698		protein_coding
LOC100332699	9.39311	7.58141	11.2048	1.51934	0.603444	0.513081	0.74222	Up	0.384561	0.0948898	0.1301	0.0929906	0.173698	0.0639677	100332699		protein_coding
LOC100332721	134.604	113.209	155.999	1.36955	0.453699	0.186713	0.43953	Up	1.0804	0.841855	0.786979	0.760005	0.305094	0.665542	100332721		protein_coding			dre04350,dre04514	TGF-beta signaling pathway|Cell adhesion molecules
LOC100332737	8.22822	9.92218	6.53425	0.663461	-0.591916	0.502584	0.73526	Down	0.172957	0.102425	0.105323	0.250937	0.187491	0.0517853	100332737		protein_coding
LOC100332762	871.233	1103.35	639.116	0.579082	-0.788161	0.083342	0.274482	Down	3.85585	5.37741	12.2383	12.3317	6.65883	13.3141	100332762		protein_coding
LOC100332787	224.349	236.251	212.446	0.897782	-0.155563	0.616695	0.810028	Down	5.44071	4.24973	3.16321	5.66326	3.01622	3.75787	100332787		protein_coding
LOC100332822	21.4088	42.8176	0	0.00385015	-8.02087	1.98776e-09	2.3128e-07	Down	0	0	0	0.76394	0.548216	0.33401	100332822		protein_coding
LOC100332841	6.22782	1.23283	11.2228	8.38962	3.06861	0.0224758	0.121338	Up	0.748171	0.338452	0.0949171	0.0904577	0	0.0311126	100332841		protein_coding
LOC100332847	399.156	467.951	330.36	0.707389	-0.499424	0.139337	0.372158	Down	6.23188	4.45935	6.62532	5.54551	8.36939	6.34405	100332847		protein_coding
LOC100332851	3.93183	3.99557	3.86809	1.00192	0.00276735	0.998091	0.998872	Up	0.122146	0.0723346	0.123969	0.0945158	0.147123	0.0243813	100332851		protein_coding
LOC100332943	5.39454	6.94418	3.84489	0.570798	-0.808947	0.452359	0.699601	Down	0.0594687	0.0167701	0.0344893	0.0410861	0.0920942	0.0254366	100332943		protein_coding
LOC100332969	251.462	280.77	222.155	0.793246	-0.334161	0.234993	0.49862	Down	1.26084	1.53441	1.75798	1.55106	1.73245	1.5638	100332969		protein_coding
LOC100333012	81.964	89.1984	74.7296	0.841533	-0.248909	0.510603	0.740991	Down	0.727708	0.772656	1.26452	0.842509	0.982753	0.946364	100333012		protein_coding
LOC100333021	148.874	206.283	91.464	0.444695	-1.16911	0.0110555	0.0749402	Down	0.93676	1.26079	0.691448	1.77554	2.50735	1.11435	100333021		protein_coding
LOC100333031	175.124	189.006	161.242	0.855789	-0.224673	0.354587	0.617956	Down	1.43457	1.57681	1.3898	1.5216	1.4432	1.41548	100333031		protein_coding
LOC100333053	178.915	186.048	171.782	0.921152	-0.118489	0.623907	0.813522	Down	2.86387	2.4478	3.20626	3.31264	2.02701	2.63725	100333053		protein_coding
LOC100333111	83.9634	75.0482	92.8785	1.23874	0.308871	0.524543	0.748864	Up	1.78393	0.806314	2.63968	1.04819	1.02415	1.49755	100333111		protein_coding
LOC100333163	2.93792	2.869	3.00684	1.04159	0.0587913	0.97083	0.985948	Up	0.0507306	0.150213	0.0514877	0	0.030552	0.177209	100333163		protein_coding
LOC100333185	38.969	40.8034	37.1347	0.900694	-0.150892	0.790347	0.90246	Down	0.687681	0.332965	0.605762	0.840853	0.187539	0.569784	100333185		protein_coding
LOC100333206	9.78779	6.13184	13.4437	2.13057	1.09124	0.25012	0.514667	Up	0.293576	0.265611	0.546255	0.354948	0.0589344	0.0488333	100333206		protein_coding
LOC100333227	8.40425	7.04114	9.76736	1.37716	0.461699	0.605417	0.802131	Up	0.182319	0.0529259	0.119732	0.0518666	0.0387529	0.128443	100333227		protein_coding			dre00071,dre04920,dre03320	Fatty acid degradation|Adipocytokine signaling pathway|PPAR signaling pathway
LOC100333228	89.9522	81.9308	97.9736	1.20264	0.266199	0.587616	0.790098	Up	1.8579	1.98192	2.3237	1.70628	1.94395	0.636814	100333228		protein_coding
LOC100333235	1.78965	1.17185	2.40745	2.09319	1.0657	0.623437	0.813395	Up	0	0.0202443	0.14572	0	0.0247052	0.0409416	100333235		protein_coding
LOC100333241	1172.24	1418.74	925.746	0.652998	-0.614849	0.0339196	0.157972	Down	7.3606	8.20449	8.43666	9.71721	12.343	8.63617	100333241		protein_coding
LOC100333244	2.96902	3.88364	2.05439	0.540269	-0.888251	0.539176	0.758333	Down	0.178631	0	0.0725187	0.103667	0.172126	0.106968	100333244		protein_coding
LOC100333265	6.36057	7.03676	5.68438	0.836531	-0.257509	0.823077	0.918377	Down	0.08997	0.0887999	0.25111	0.0435113	0.298009	0.0673451	100333265		protein_coding			dre04080	Neuroactive ligand-receptor interaction
LOC100333266	41.0742	40.5431	41.6052	1.0186	0.0265918	0.952732	0.979497	Up	0.287126	0.417216	0.404738	0.324006	0.182525	0.437804	100333266		protein_coding
LOC100333355	23.177	9.53108	36.823	3.94041	1.97835	0.0354978	0.162609	Up	0.507341	0.500743	1.849	0.24536	0.333317	0.0230157	100333355		protein_coding
LOC100333406	8.45581	2.80509	14.1065	4.70241	2.2334	0.0265848	0.134654	Up	0.0624309	0.136931	0.126725	0.0402571	0	0.0207695	100333406		protein_coding
LOC100333433	6.28203	2.74411	9.81995	3.48845	1.80258	0.0660428	0.238766	Up	0.178788	0.0882316	0.226821	0.0432329	0.0179456	0.0594792	100333433		protein_coding
LOC100333474	4.71443	0.678862	8.75	12.3662	3.62833	0.0787518	0.265331	Up	0	0.182487	0.356537	0	0	0.0369058	100333474		protein_coding
LOC100333482	2.31167	2.85604	1.76731	0.620486	-0.688529	0.622826	0.813295	Down	0.143971	0.0355247	0.0365299	0.139255	0.0867052	0.0718443	100333482		protein_coding
LOC100333484	29.1874	13.521	44.8538	3.35135	1.74474	0.00985044	0.0694619	Up	0.119646	0.479305	0.45001	0.0884965	0.101725	0.0772659	100333484		protein_coding
LOC100333499	1040.48	1154.87	926.103	0.801377	-0.319447	0.255132	0.520482	Down	3.86072	4.14492	5.84131	6.42065	3.21645	5.45491	100333499		protein_coding
LOC100333521	107.775	106.392	109.158	1.0225	0.0321005	0.942804	0.97588	Up	3.89032	5.64273	2.78103	3.56655	1.87433	5.09814	100333521		protein_coding			dre04142,dre04210	Lysosome|Apoptosis
LOC100333534	87.4497	96.6156	78.2838	0.811203	-0.301865	0.403193	0.658497	Down	0.408059	0.408346	0.672992	0.476919	0.457367	0.627857	100333534		protein_coding
LOC100333572	12.7517	12.6648	12.8386	1.04208	0.0594658	0.950276	0.978795	Up	0.152674	0.180826	0.103301	0.0590688	0.24519	0.0304748	100333572		protein_coding
LOC100333746	4.54714	4.59482	4.49945	0.96971	-0.0443754	0.966557	0.984325	Down	0.0445595	0.0879599	0.090449	0.0430997	0.0357807	0.118592	100333746		protein_coding
LOC100333749	1.04189	0	2.08378	10.2627	3.35934	0.305554	0.573418	Up	0.0765561	0	0.194246	0	0	0	100333749		protein_coding
LOC100333801	41.1651	33.9825	48.3477	1.44282	0.528888	0.291694	0.559687	Up	0.68245	0.620745	0.86919	0.440062	0.580234	0.240392	100333801		protein_coding			dre00562,dre04070,dre04140	Inositol phosphate metabolism|Phosphatidylinositol signaling system|Autophagy - animal
LOC100333835	81.6029	117.267	45.9393	0.390716	-1.35581	0.00910245	0.0658424	Down	0.45063	0.382502	0.557974	1.95269	0.694752	0.503716	100333835		protein_coding
LOC100333855	70.2296	60.6293	79.8299	1.30931	0.388812	0.640438	0.823903	Up	0.613641	1.35192	0.94532	1.18708	0.0395956	0.831165	100333855		protein_coding
LOC100333907	23.4571	25.8143	21.1	0.812065	-0.300333	0.694249	0.854669	Down	0.165172	1.04335	1.10641	1.02247	0.437683	1.05503	100333907		protein_coding
LOC100333926	47.5969	21.6699	73.5239	3.38692	1.75997	0.0319099	0.152056	Up	2.39937	1.28664	0.997081	0.804046	0.364094	0.0377112	100333926		protein_coding
LOC100333939	4.17504	2.32142	6.02866	2.52462	1.33607	0.317431	0.584354	Up	0.0359544	0.283895	0.401401	0.173883	0.0433064	0.0358839	100333939		protein_coding
LOC100333957	60.5676	54.8499	66.2852	1.2009	0.264114	0.575196	0.781869	Up	0.969783	0.494363	0.91936	0.61847	0.282394	0.818975	100333957		protein_coding
LOC100334054	18.8115	23.6371	13.9859	0.585445	-0.772395	0.195685	0.451011	Down	0.366306	0.220942	0.371773	0.551143	0.220604	0.649933	100334054		protein_coding
LOC100334068	7.81734	15.0337	0.600963	0.0393961	-4.6658	0.00149091	0.0189163	Down	0	0	0.0478897	0.570496	0.085251	0.423836	100334068		protein_coding
LOC100334085	326.533	373.942	279.124	0.746263	-0.422244	0.221791	0.483791	Down	2.93977	5.63393	3.67938	6.22247	4.16016	3.85499	100334085		protein_coding
LOC100334101	3.02216	2.44631	3.59801	1.44778	0.533843	0.664766	0.83824	Up	0.0232089	0.0458141	0.0235553	0.0149657	0.00931822	0.0308845	100334101		protein_coding
LOC100334104	96.3912	98.8965	93.8859	0.956763	-0.0637672	0.878752	0.946164	Down	3.34799	3.0823	2.42711	2.1498	3.52428	1.99362	100334104		protein_coding
LOC100334116	15.3654	11.6007	19.1301	1.61658	0.692942	0.247638	0.511873	Up	0.151019	0.173898	0.212879	0.137957	0.0505277	0.100482	100334116		protein_coding			dre04010,dre04020,dre04510	MAPK signaling pathway|Calcium signaling pathway|Focal adhesion
LOC100334178	277.461	269.632	285.29	1.05707	0.0800763	0.716151	0.866727	Up	3.77278	3.97121	3.14656	3.40664	2.37508	3.0942	100334178		protein_coding			dre04217,dre04621	Necroptosis|NOD-like receptor signaling pathway
LOC100334195	2.84672	5.69345	0	0.0286587	-5.12488	0.0353898	0.162383	Down	0	0	0	0.226144	0	0.186676	100334195		protein_coding
LOC100334198	187.535	166.056	209.014	1.25407	0.326618	0.440663	0.690444	Up	2.75764	4.24787	4.1254	3.14526	1.11358	3.5954	100334198		protein_coding	GO:0005783,GO:0005789,GO:0005794,GO:0006612,GO:0010008,GO:0016020,GO:0016409,GO:0016740,GO:0016746,GO:0018230,GO:0019706	endoplasmic reticulum|endoplasmic reticulum membrane|Golgi apparatus|protein targeting to membrane|endosome membrane|membrane|palmitoyltransferase activity|transferase activity|acyltransferase activity|peptidyl-L-cysteine S-palmitoylation|protein-cysteine S-palmitoyltransferase activity
LOC100334245	1.41683	2.52957	0.304085	0.126545	-2.98228	0.256901	0.522731	Down	0	0.0238356	0	0	0.0290878	0.144614	100334245		protein_coding
LOC100334281	66.135	53.6025	78.6676	1.46416	0.550072	0.232213	0.495598	Up	0.555904	1.33249	0.70525	0.662514	0.406528	0.475554	100334281		protein_coding	GO:0009897,GO:0035723,GO:0042110,GO:0042289,GO:0045121,GO:0070374,GO:1990782	external side of plasma membrane|interleukin-15-mediated signaling pathway|T cell activation|MHC class II protein binding|membrane raft|positive regulation of ERK1 and ERK2 cascade|protein tyrosine kinase binding
LOC100334356	35.7615	9.89352	61.6294	6.27122	2.64875	5.37577e-05	0.00156351	Up	1.57676	2.51747	0.658944	0.269136	0.223433	0.161995	100334356		protein_coding
LOC100334368	28.9151	23.9606	33.8696	1.39061	0.475716	0.395953	0.652702	Up	0.381052	0.218136	0.270717	0.302227	0.0734352	0.17494	100334368		protein_coding
LOC100334396	14.163	0	28.326	139.439	7.12349	8.26964e-06	0.00035207	Up	0.0480929	0.341766	0.517393	0	0	0	100334396		protein_coding
LOC100334401	2.34766	1.97195	2.72337	1.43522	0.521274	0.83516	0.926308	Up	0.0174027	0.137411	0	0	0.0838448	0	100334401		protein_coding
LOC100334439	2.27647	4.25246	0.300481	0.0742144	-3.75216	0.109683	0.323597	Down	0	0	0.0107854	0.123344	0	0.0212118	100334439		protein_coding
LOC100334443	1615.38	2011.84	1218.91	0.605942	-0.722749	0.000122941	0.0030007	Down	17.7459	17.6778	20.7291	26.637	22.9297	29.5414	100334443		protein_coding			dre04218	Cellular senescence
LOC100334508	19.0091	23.5896	14.4286	0.619754	-0.690232	0.341674	0.607256	Down	0.29673	0.84607	0.435006	0.446458	1.07221	0.592294	100334508		protein_coding
LOC100334521	3.53938	6.4742	0.604566	0.0924851	-3.43464	0.020226	0.112767	Down	0	0.031675	0.0325714	0.186246	0.154619	0.256236	100334521		protein_coding
LOC100334522	1.79926	1.23283	2.36568	1.83163	0.873129	0.662019	0.836893	Up	0.11194	0.0662907	0	0.064964	0	0.0223441	100334522		protein_coding
LOC100334559	3.60579	0.935031	6.27656	6.11283	2.61184	0.0522985	0.206352	Up	0.332078	0.382385	0.449378	0.107066	0	0.0552377	100334559		protein_coding
LOC100334599	1.34324	2.3824	0.304085	0.132718	-2.91356	0.370861	0.631611	Down	0	0.0570585	0	0.447332	0	0	100334599		protein_coding	GO:0004601,GO:0005344,GO:0005506,GO:0005833,GO:0015671,GO:0019825,GO:0020037,GO:0031720,GO:0031838,GO:0042744,GO:0043177,GO:0046872	peroxidase activity|oxygen carrier activity|iron ion binding|hemoglobin complex|oxygen transport|oxygen binding|heme binding|haptoglobin binding|haptoglobin-hemoglobin complex|hydrogen peroxide catabolic process|organic acid binding|metal ion binding
LOC100334604	250.504	122.461	378.547	3.08941	1.62733	0.000614337	0.0100083	Up	33.0932	20.2875	12.0997	9.59278	5.26104	3.48746	100334604		protein_coding
LOC100334612	15.0415	14.1582	15.9248	1.13372	0.18106	0.783923	0.899819	Up	0.113751	0.303133	0.184717	0.154034	0.164413	0.136233	100334612		protein_coding
LOC100334619	805.663	958.938	652.389	0.679858	-0.556695	0.00173135	0.0209914	Down	8.16398	7.62575	8.16364	12.6493	7.97477	9.80813	100334619		protein_coding
LOC100334677	11.0979	5.16176	17.034	3.23732	1.6948	0.0725621	0.252752	Up	0.24794	0.312692	0.223681	0.0266464	0.0165911	0.164969	100334677		protein_coding
LOC100334689	6.5892	8.67073	4.50768	0.516858	-0.95216	0.437019	0.687612	Down	0.036687	0.0995772	0	0.124198	0.055236	0.0549225	100334689		protein_coding			dre04080	Neuroactive ligand-receptor interaction
LOC100334697	12.7019	15.2118	10.1921	0.674746	-0.567583	0.483588	0.722419	Down	0.107221	0.198425	0.149629	0.0648178	0.193718	0.307656	100334697		protein_coding
LOC100334706	27.4472	33.6036	21.2907	0.630564	-0.665285	0.23686	0.499836	Down	0.263172	0.482392	0.591435	0.963656	0.475478	0.412745	100334706		protein_coding
LOC100334731	3.15637	0.935031	5.3777	5.26074	2.39527	0.0881257	0.283214	Up	0.0387793	0.0382749	0.0629728	0.0150035	0	0.00774063	100334731		protein_coding
LOC100334800	19.6019	9.86558	29.3382	2.87993	1.52603	0.0212571	0.116677	Up	0.689591	0.992574	1.13731	0.416875	0.0692165	0.372795	100334800	microfibril-associated glycoprotein 4-like	protein_coding
LOC100334838	21.1397	24.5104	17.769	0.725297	-0.463357	0.543073	0.760466	Down	0.672343	0.0947998	0.682377	0.487738	0.433834	0.766884	100334838		protein_coding
LOC100334841	1.48022	0	2.96045	14.5845	3.86637	0.188708	0.442513	Up	0.0834641	0.0549191	0	0	0	0	100334841		protein_coding
LOC100334869	7.79662	5.18111	10.4121	1.94576	0.960334	0.351173	0.615198	Up	0.363024	0.230337	0.315807	0.150485	0	0.258794	100334869		protein_coding
LOC100334911	3.03974	3.38134	2.69814	0.783303	-0.352359	0.800737	0.907543	Down	0.0175383	0.0173102	0.1246	0.067855	0.0211245	0.0875194	100334911		protein_coding
LOC100334934	2.52742	2.0846	2.97025	1.37085	0.455072	0.811104	0.912891	Up	0.269658	0.212921	0.0547366	0.365154	0	0	100334934		protein_coding			dre04217	Necroptosis
LOC100334952	6.14448	5.43363	6.85534	1.24215	0.312835	0.748035	0.882331	Up	0.0339536	0.033512	0.0191446	0.0401394	0.0136322	0.00753044	100334952		protein_coding
LOC100500933	73.5194	85.1761	61.8626	0.724461	-0.46502	0.412461	0.66659	Down	0.904465	0.908933	1.60226	0.906647	0.653646	2.51112	100500933	naked cuticle-like protein 3	protein_coding
LOC100534669	15.2678	21.2611	9.27462	0.431964	-1.21102	0.0805861	0.268944	Down	0.341367	0.539084	0.173231	0.924516	0.370053	0.851744	100534669		protein_coding
LOC100534672	3.99812	3.79107	4.20516	1.09165	0.126504	0.90851	0.959852	Up	0.0171464	0.0423085	0.060908	0.049754	0.0206525	0.0256691	100534672		protein_coding
LOC100534675	3.45314	3.90665	2.99964	0.747199	-0.420436	0.759646	0.887344	Down	0.03005	0.0593185	0.060997	0.0581312	0	0.119964	100534675		protein_coding
LOC100534707	2.12494	2.76346	1.48642	0.51857	-0.94739	0.564606	0.774745	Down	0.0682045	0.0336587	0.0692224	0.230895	0	0.0680707	100534707		protein_coding
LOC100534715	880.598	705.576	1055.62	1.49472	0.579876	0.258474	0.524634	Up	23.4196	27.2687	15.9163	24.9341	4.1824	11.5456	100534715		protein_coding
LOC100534733	6.85984	9.25063	4.46905	0.477046	-1.0678	0.247625	0.511873	Down	0.0648008	0.0383748	0.0920751	0.11282	0.0468308	0.194021	100534733		protein_coding
LOC100534741	2.17981	1.99496	2.36466	1.16213	0.216765	0.911538	0.961298	Up	0.0474008	0	0.0481082	0.011462	0	0.0591347	100534741		protein_coding
LOC100534755	2.00201	1.27446	2.72956	2.05517	1.03926	0.598978	0.797573	Up	0	0.0910797	0.0267591	0.0255019	0	0.0263139	100534755		protein_coding
LOC100534765	4.59313	3.78176	5.4045	1.37386	0.458235	0.707665	0.862061	Up	0.0561128	0.129227	0.151867	0.126641	0	0.0933379	100534765		protein_coding
LOC100534771	12.0548	10.9628	13.1469	1.21837	0.284953	0.668843	0.840319	Up	0.318502	0.31436	0.538759	0.256723	0.319691	0.238408	100534771		protein_coding
LOC100534777	7.45221	10.6786	4.22577	0.391	-1.35476	0.173503	0.421231	Down	0.0190311	0.150269	0.0965758	0.202484	0.0916905	0.303901	100534777		protein_coding
LOC100534780	2.7162	2.16786	3.26453	1.45517	0.54119	0.762886	0.888696	Up	0.184488	0.15174	0	0.148703	0	0.0613752	100534780		protein_coding
LOC100534786	2.10031	2.6802	1.52043	0.558892	-0.839358	0.781828	0.898797	Down	0	0.0734615	0	0.129584	0	0	100534786		protein_coding
LOC100534789	330.88	414.65	247.109	0.59695	-0.744317	0.00397312	0.0380906	Down	2.61125	2.86723	3.53362	4.44102	4.44258	3.89832	100534789		protein_coding
LOC100534815	20.8348	31.006	10.6636	0.346291	-1.52994	0.0102122	0.0713375	Down	0.32283	0.150931	0.137957	0.59164	0.5321	0.37307	100534815		protein_coding
LOC100534830	1.36658	0	2.73316	13.4469	3.7492	0.235743	0.499025	Up	0	0.0908889	0.0116826	0	0	0	100534830		protein_coding
LOC100534832	12.7426	15.574	9.91116	0.630685	-0.665009	0.357963	0.619956	Down	0.348054	0.858818	0.706497	1.45882	0.628836	0.578951	100534832		protein_coding
LOC100534851	5.45199	6.80139	4.10258	0.59379	-0.751974	0.612376	0.807276	Down	0.0947381	0.00850055	0.0174822	0.133287	0	0.0515739	100534851		protein_coding
LOC100534853	11.1871	10.9441	11.4301	1.04075	0.0576262	0.958531	0.981291	Up	0.0144464	0.0855511	0.454522	0.167678	0.104402	0.187435	100534853		protein_coding
LOC100534861	21.6185	24.5621	18.675	0.755984	-0.403573	0.560422	0.772296	Down	0.231594	0.939725	0.417867	0.622241	0.371933	0.847511	100534861		protein_coding
LOC100534909	8.3698	4.57254	12.1671	2.56015	1.35623	0.122638	0.345152	Up	0.597544	0.353863	0.272908	0.231187	0.0359865	0.149093	100534909		protein_coding	GO:0000978,GO:0000981,GO:0001654,GO:0001756,GO:0005634,GO:0006357,GO:0007219,GO:0007420,GO:0009952,GO:0046983,GO:0050767	RNA polymerase II cis-regulatory region sequence-specific DNA binding|DNA-binding transcription factor activity, RNA polymerase II-specific|eye development|somitogenesis|nucleus|regulation of transcription by RNA polymerase II|Notch signaling pathway|brain development|anterior/posterior pattern specification|protein dimerization activity|regulation of neurogenesis	dre04330	Notch signaling pathway
LOC100534937	2.02164	3.44233	0.600963	0.171344	-2.54503	0.267904	0.534806	Down	0	0	0.0460552	0.15362	0	0.0905779	100534937		protein_coding			dre04010,dre04068,dre04150,dre04140,dre04114,dre04810,dre04910,dre04914	MAPK signaling pathway|FoxO signaling pathway|mTOR signaling pathway|Autophagy - animal|Oocyte meiosis|Regulation of actin cytoskeleton|Insulin signaling pathway|Progesterone-mediated oocyte maturation
LOC100535016	1.21274	0	2.42547	11.9329	3.57687	0.257226	0.523138	Up	0	0.1376	0.0471646	0	0	0	100535016		protein_coding
LOC100535061	25.7981	33.669	17.9272	0.539266	-0.89093	0.0978859	0.302272	Down	0.205419	0.214674	0.306595	0.303878	0.494846	0.325614	100535061		protein_coding
LOC100535067	5.39791	3.93531	6.86051	1.68286	0.750916	0.451935	0.699173	Up	0.176233	0.124244	0.281071	0.17046	0.0303242	0.100507	100535067		protein_coding
LOC100535070	1.80344	1.1912	2.41568	1.92065	0.941596	0.654367	0.832048	Up	0.01516	0.0897768	0.0153862	0.0586533	0	0	100535070		protein_coding
LOC100535079	1.95493	0	3.90986	19.2471	4.26657	0.146827	0.384	Up	0	0.0485038	0.598517	0	0	0	100535079		protein_coding
LOC100535100	31.8254	25.1633	38.4875	1.53055	0.614046	0.235554	0.499025	Up	0.967009	0.387306	0.469385	0.39311	0.286966	0.335691	100535100		protein_coding
LOC100535104	72.6147	100.113	45.1167	0.450262	-1.15116	0.019215	0.108865	Down	0.677071	0.253131	0.635117	1.538	0.790806	0.675742	100535104		protein_coding
LOC100535105	53.1834	47.8807	58.4861	1.21315	0.278756	0.667127	0.839463	Up	0.779705	0.410434	0.518768	0.410599	0.0939139	0.734943	100535105		protein_coding
LOC100535113	6.29664	8.36289	4.23039	0.508261	-0.976359	0.456921	0.703098	Down	0.0333774	0.19766	0	0.129136	0.16081	0.0999357	100535113		protein_coding
LOC100535121	9.07998	8.64206	9.51789	1.08671	0.119973	0.871601	0.94332	Up	0.29449	0.228376	0.149443	0.223805	0.101345	0.209938	100535121		protein_coding
LOC100535133	8.58691	6.35862	10.8152	1.72178	0.783902	0.378458	0.637846	Up	0.0511844	0.131349	0.187014	0.0792122	0.0739807	0.0306504	100535133		protein_coding
LOC100535144	4.44481	1.95332	6.9363	3.44503	1.78451	0.299864	0.568522	Up	0	0.187957	0.441774	0.0526273	0	0.108606	100535144		protein_coding
LOC100535162	9.47616	18.6482	0.304085	0.0170637	-5.87292	4.00452e-05	0.00123687	Down	0	0.0705978	0	2.07554	0.689233	1.21359	100535162		protein_coding
LOC100535191	22.6672	21.7152	23.6192	1.10909	0.149383	0.866492	0.940579	Up	0.194926	0.269348	0.150355	0.0527913	0.328699	0.0544722	100535191		protein_coding
LOC100535208	17.0423	4.70675	29.3778	6.249	2.64363	0.000153297	0.00356323	Up	0.389928	0.737641	0.461705	0.0628589	0.0587075	0.0972906	100535208		protein_coding
LOC100535229	2.66748	3.55425	1.78071	0.488325	-1.03409	0.45536	0.701891	Down	0.125042	0.0822769	0.0423026	0.322521	0.0502034	0.0831975	100535229		protein_coding
LOC100535263	4.79144	8.67784	0.905048	0.102802	-3.28206	0.096435	0.299445	Down	0	0.0572545	0.117749	1.57104	0	0.0578951	100535263		protein_coding
LOC100535278	86.6079	90.1434	83.0723	0.918474	-0.122689	0.875714	0.945066	Down	0.422972	0.294218	0.408842	0.385738	0.0291121	0.683468	100535278		protein_coding			dre04512,dre04510	ECM-receptor interaction|Focal adhesion
LOC100535316	303.338	370.132	236.544	0.63932	-0.64539	0.0358816	0.163548	Down	5.37841	7.73189	10.0274	10.3479	9.36521	11.1733	100535316		protein_coding
LOC100535353	406.785	469.265	344.306	0.734849	-0.44448	0.0413978	0.177883	Down	20.5019	22.2148	21.5429	27.4282	24.7612	22.2409	100535353		protein_coding
LOC100535385	18.6021	16.3944	20.8098	1.25345	0.325909	0.631079	0.817757	Up	0.261642	0.12912	0.265547	0.144612	0.0562756	0.251803	100535385		protein_coding
LOC100535393	129.563	112.042	147.084	1.30597	0.385126	0.456382	0.702691	Up	0.236083	0.144494	0.273071	0.264069	0.0508349	0.134264	100535393		protein_coding
LOC100535415	60.137	87.6418	32.6321	0.37479	-1.41584	0.00774934	0.0593237	Down	0.471574	0.689543	0.744508	0.844677	2.06164	1.25506	100535415		protein_coding
LOC100535423	69.0327	48.9667	89.0986	1.81378	0.859	0.159715	0.403284	Up	4.44784	6.77313	1.33277	2.991	1.3776	1.73337	100535423		protein_coding
LOC100535429	4.18359	4.72537	3.64181	0.788684	-0.34248	0.826911	0.920949	Down	0	0.227766	0.0468422	0.0446414	0.194568	0.0460628	100535429		protein_coding
LOC100535451	78.8597	66.7806	90.9389	1.34896	0.431846	0.289254	0.557589	Up	0.485403	0.66509	0.585381	0.541308	0.178837	0.416058	100535451		protein_coding
LOC100535454	720.335	724.911	715.759	0.987083	-0.018756	0.946653	0.977036	Down	18.4263	13.5667	10.0154	14.3257	9.42462	12.9167	100535454		protein_coding
LOC100535468	143.944	155.493	132.396	0.848713	-0.236651	0.583147	0.787715	Down	3.38444	5.9142	2.92816	6.54714	2.43922	3.82079	100535468		protein_coding
LOC100535522	1.64868	3.29736	0	0.0507403	-4.30072	0.155752	0.397693	Down	0	0	0	0	0.164413	0.0227055	100535522		protein_coding
LOC100535543	19.7882	38.0632	1.51322	0.0392434	-4.67141	1.24094e-05	0.000480216	Down	0	0.0222841	0.0152765	0.298454	0.0634536	0.495735	100535543		protein_coding
LOC100535555	1.59866	0.492987	2.70433	6.83491	2.77292	0.386075	0.644129	Up	0	0	0.207248	0	0.0273284	0	100535555		protein_coding
LOC100535633	29.198	23.909	34.487	1.4252	0.511169	0.331521	0.597965	Up	0.445015	0.32942	0.217142	0.306272	0.113387	0.187906	100535633		protein_coding
LOC100535674	30.5215	14.9382	46.1047	3.17915	1.66864	0.0305807	0.14801	Up	0.935609	0.469546	1.06223	0.0613531	0.401108	0.158267	100535674		protein_coding			dre04621	NOD-like receptor signaling pathway
LOC100535676	12.8414	20.5663	5.11641	0.25163	-1.99062	0.0629708	0.231927	Down	0.0263143	0.12986	0.293777	0.203618	0.950851	0.262626	100535676		protein_coding
LOC100535691	348.549	368.617	328.481	0.892895	-0.163438	0.563246	0.7741	Down	3.42624	2.58123	4.06002	3.2523	3.40245	2.83747	100535691		protein_coding
LOC100535694	105.765	66.9363	144.594	2.14893	1.10362	0.0046931	0.0424681	Up	1.3916	1.13265	0.676064	0.529475	0.270092	0.493675	100535694		protein_coding	GO:0004721,GO:0004725,GO:0005001,GO:0005615,GO:0006470,GO:0016020,GO:0016311,GO:0016787,GO:0016791,GO:0030155,GO:0031175,GO:0062023	phosphoprotein phosphatase activity|protein tyrosine phosphatase activity|transmembrane receptor protein tyrosine phosphatase activity|extracellular space|protein dephosphorylation|membrane|dephosphorylation|hydrolase activity|phosphatase activity|regulation of cell adhesion|neuron projection development|collagen-containing extracellular matrix
LOC100535713	9.66335	3.58584	15.7408	4.62958	2.21088	0.00879898	0.0642939	Up	0.177964	0.102462	0.112887	0.0143445	0.0357257	0.0222018	100535713		protein_coding
LOC100535728	17.4972	29.1085	5.88588	0.202049	-2.30722	0.0184531	0.105731	Down	0.255469	0.0193959	0.119669	1.15947	0.378717	0.176516	100535728		protein_coding
LOC100535743	6.21976	10.3485	2.09098	0.201335	-2.31233	0.0152021	0.0933178	Down	0.0288804	0.0285048	0.0439672	0.139672	0.104358	0.187354	100535743		protein_coding
LOC100535760	3.24346	1.1912	5.29573	4.17291	2.06105	0.260249	0.527086	Up	0.156805	0.0476201	0.0122419	0.046667	0	0	100535760		protein_coding
LOC100535772	2.32549	1.96264	2.68834	1.41244	0.498191	0.733745	0.87455	Up	0.0110584	0.00545728	0.0336702	0.00534805	0.0133196	0.0110367	100535772		protein_coding
LOC100535806	89.8146	112.823	66.8064	0.590964	-0.758857	0.0850189	0.277763	Down	0.732246	1.10715	1.64447	1.56721	1.12593	2.39457	100535806		protein_coding
LOC100535814	51.584	53.4942	49.6739	0.923395	-0.11498	0.762467	0.888483	Down	1.24274	1.66465	2.01206	1.86029	1.06919	1.68327	100535814		protein_coding
LOC100535819	1.79665	0.2978	3.2955	8.32968	3.05826	0.236123	0.499364	Up	0.0118212	0	0.119976	0.0114339	0	0	100535819		protein_coding
LOC100535838	4.30455	3.80038	4.80872	1.28294	0.359451	0.786379	0.900491	Up	0.0260302	0.0770751	0.317025	0.125887	0.125412	0.0259792	100535838		protein_coding
LOC100535879	46.2829	42.3549	50.2109	1.17558	0.233372	0.524556	0.748864	Up	0.91148	1.09754	1.05459	0.95215	0.505015	0.800529	100535879		protein_coding
LOC100535892	1.18284	0	2.36568	11.6555	3.54295	0.25846	0.524634	Up	0.148336	0.087844	0	0	0	0	100535892		protein_coding
LOC100535932	3.19288	4.58186	1.8039	0.390564	-1.35637	0.266694	0.533522	Down	0.0309452	0.0916283	0.0628141	0.20952	0.111819	0.0926535	100535932		protein_coding
LOC100535941	104.096	103.785	104.406	1.01072	0.0153875	0.960654	0.982239	Up	1.21429	1.17885	1.09099	1.14563	1.04299	0.745024	100535941		protein_coding
LOC100535945	3.97534	4.38667	3.564	0.79805	-0.32545	0.767321	0.891	Down	0.0621067	0.0245196	0.0630336	0.0961154	0.0299225	0.0371909	100535945	carbohydrate-responsive element-binding protein-like	protein_coding
LOC100535969	145.564	157.217	133.911	0.85567	-0.224873	0.392738	0.649688	Down	1.5346	1.35625	1.61858	1.44552	1.53429	1.48154	100535969		protein_coding
LOC100535993	207.062	301.368	112.757	0.373933	-1.41915	0.000837784	0.012541	Down	1.1663	2.37496	1.0591	3.20615	2.6469	4.79081	100535993		protein_coding
LOC100536038	25.6216	24.6368	26.6064	1.0735	0.102318	0.916048	0.963473	Up	1.93911	1.05947	0.105431	1.00478	0.208537	1.3478	100536038		protein_coding
LOC100536110	24.4726	23.4958	25.4494	1.08073	0.112003	0.859453	0.937748	Up	0.624962	0.249358	0.26991	0.231506	0.192192	0.477755	100536110		protein_coding
LOC100536119	950.339	1129.98	770.699	0.682675	-0.550729	0.0353819	0.162383	Down	34.7062	39.6813	36.4448	41.2137	50.8568	44.1979	100536119		protein_coding			dre00760	Nicotinate and nicotinamide metabolism
LOC100536129	601.992	639.468	564.516	0.883263	-0.179085	0.489566	0.726307	Down	3.26332	4.72528	4.6818	4.0267	3.82546	4.37606	100536129		protein_coding
LOC100536156	80.8125	145.836	15.7893	0.108343	-3.20632	6.77568e-09	7.0077e-07	Down	0.524169	0.517352	0.217633	1.95885	2.66889	5.2314	100536156		protein_coding			dre00500,dre00230,dre00240,dre00740,dre00760,dre00770	Starch and sucrose metabolism|Purine metabolism|Pyrimidine metabolism|Riboflavin metabolism|Nicotinate and nicotinamide metabolism|Pantothenate and CoA biosynthesis
LOC100536174	14.1813	14.2572	14.1055	0.997753	-0.00324553	0.996677	0.997993	Down	0.217289	0.455733	0.606462	0.499155	0.45801	0.135539	100536174		protein_coding
LOC100536175	10.706	14.2263	7.18577	0.50139	-0.995995	0.396548	0.653098	Down	0.0457263	0.0150439	0.309391	0.457026	0.110153	0.0912731	100536175		protein_coding
LOC100536182	71.443	90.3886	52.4973	0.583425	-0.77738	0.0583208	0.220539	Down	1.02817	0.774934	1.49886	1.75391	1.80132	1.21272	100536182		protein_coding
LOC100536213	397.025	528.497	265.552	0.50318	-0.990855	0.0493746	0.199073	Down	4.13443	5.8599	7.4178	5.6289	15.1519	7.11838	100536213		protein_coding
LOC100536312	10.9601	13.244	8.67624	0.642871	-0.637398	0.515592	0.743751	Down	0.150944	0.231749	0.102131	0.454221	0.0202011	0.217603	100536312		protein_coding
LOC100536326	9.43636	3.54421	15.3285	4.49457	2.16818	0.0240715	0.1262	Up	0.265456	0.738375	0.220433	0.0700255	0.116268	0.0481701	100536326		protein_coding
LOC100536344	42.8329	42.5205	43.1453	1.0121	0.0173501	0.970608	0.985911	Up	0.957366	1.61191	1.48606	1.74306	0.98355	0.758769	100536344		protein_coding
LOC100536348	14.8096	12.6053	17.0139	1.36211	0.445845	0.506301	0.737991	Up	0.333856	0.247136	0.614145	0.302737	0.27646	0.166601	100536348		protein_coding
LOC100536376	1.49029	2.37602	0.604566	0.251177	-1.99322	0.457273	0.703322	Down	0	0.010061	0.0103457	0	0	0.0712152	100536376		protein_coding
LOC100536410	1.73679	2.869	0.604566	0.209015	-2.25832	0.307313	0.575085	Down	0	0.0173462	0.0178371	0	0.0211685	0.122782	100536410		protein_coding
LOC100536422	3.35623	2.82737	3.88509	1.3591	0.442652	0.72404	0.868968	Up	0.0397308	0.0490176	0.0403237	0.0096073	0.0119637	0.0594792	100536422		protein_coding
LOC100536426	4.91527	0.492987	9.33756	23.5938	4.56034	0.0130649	0.0840931	Up	0.0742005	0.659119	1.58147	0	0.089373	0	100536426		protein_coding
LOC100536500	6.25327	8.32198	4.18456	0.494784	-1.01513	0.322597	0.589203	Down	0.0961858	0.0632899	0.292864	0.465174	0.115854	0.223993	100536500		protein_coding
LOC100536501	9.17872	5.7853	12.5721	2.25054	1.17027	0.241988	0.505346	Up	0.323431	0.540226	0.176754	0.0240643	0.209766	0.148983	100536501		protein_coding
LOC100536506	16.9941	18.1092	15.879	0.878466	-0.186942	0.792477	0.903231	Down	0.153651	0.234372	0.354417	0.378298	0.252367	0.0975858	100536506		protein_coding
LOC100536572	21.1509	18.296	24.0058	1.30463	0.383645	0.555006	0.768264	Up	0.718697	0.328723	0.373607	0.237369	0.168909	0.524844	100536572		protein_coding
LOC100536575	337.878	393.76	281.996	0.717938	-0.478068	0.0706352	0.248645	Down	6.63647	6.7134	6.18996	6.839	8.36702	7.67577	100536575		protein_coding
LOC100536587	34.5185	38.0902	30.9467	0.805263	-0.312467	0.465036	0.708346	Down	0.401237	0.28287	0.310267	0.480496	0.218628	0.371846	100536587		protein_coding
LOC100536595	203.739	202.676	204.802	1.01466	0.0209962	0.947646	0.977594	Up	2.76646	1.90618	2.52167	1.9791	2.33879	1.61494	100536595		protein_coding
LOC100536599	2.85559	0	5.71118	28.1068	4.81285	0.0144107	0.0897788	Up	0.0388507	0.115036	0.216868	0	0	0	100536599		protein_coding
LOC100536608	4.04091	4.46062	3.62121	0.79011	-0.339875	0.808922	0.912096	Down	0.0132449	0.0915084	0.0537702	0.0896769	0	0.0925323	100536608		protein_coding
LOC100536609	5.57915	5.45591	5.70239	1.04744	0.0668719	0.941189	0.97517	Up	0.0575639	0.127834	0.0876345	0.0835172	0.0693346	0.0718137	100536609		protein_coding
LOC100536647	390.564	432.157	348.971	0.808215	-0.307189	0.1236	0.346677	Down	7.50249	7.40492	8.82866	9.41412	7.6689	8.01394	100536647		protein_coding
LOC100536648	2525.92	1523.26	3528.59	2.31532	1.21121	0.00762214	0.0587011	Up	91.3352	123.365	97.2903	71.2989	14.4685	36.5469	100536648		protein_coding
LOC100536657	1365.76	1887.46	844.065	0.447381	-1.16042	0.0089486	0.0650282	Down	4.71872	5.88118	8.88613	8.22877	17.4076	9.83142	100536657		protein_coding
LOC100536660	3.29977	5.12651	1.47302	0.282887	-1.8217	0.219182	0.480249	Down	0.046653	0	0.0315662	0.165457	0.0187309	0.0620819	100536660		protein_coding
LOC100536667	3.10674	2.31138	3.90209	1.80935	0.855471	0.578041	0.784123	Up	0.120576	0.277685	0.122375	0	0.193642	0.0401131	100536667		protein_coding
LOC100536670	1.33335	2.37602	0.290685	0.134093	-2.89869	0.376261	0.636323	Down	0.0353151	0	0	0	0	0.246721	100536670		protein_coding
LOC100536673	4.42878	4.95288	3.90468	0.81215	-0.300182	0.801616	0.907836	Down	0.02773	0.0684233	0.0844314	0.0134108	0.100201	0.0691889	100536673		protein_coding			dre00510,dre00513	N-Glycan biosynthesis|Various types of N-glycan biosynthesis
LOC100536676	21.3667	28.7722	13.9612	0.484248	-1.04618	0.050779	0.202661	Down	0.356747	0.240073	0.164578	0.501905	0.332037	0.517886	100536676		protein_coding
LOC100536726	282.345	349.429	215.261	0.617199	-0.696193	0.187317	0.440403	Down	1.14476	1.25071	2.02546	0.905938	2.98626	1.87568	100536726		protein_coding
LOC100536757	266.776	291.489	242.063	0.831536	-0.26615	0.507544	0.739224	Down	3.44286	1.59059	1.61908	1.78706	2.24499	2.65628	100536757		protein_coding
LOC100536777	91.0447	109.006	73.0833	0.67533	-0.566335	0.221932	0.483945	Down	0.854457	0.803185	0.836237	0.718238	1.51926	0.781715	100536777		protein_coding
LOC100536790	51.7934	40.8434	62.7433	1.52653	0.610259	0.228187	0.491266	Up	1.09181	0.742355	0.726425	0.868302	0.336072	0.266363	100536790		protein_coding
LOC100536850	3.02035	3.61523	2.42547	0.65483	-0.610809	0.754161	0.884759	Down	0	0.0744906	0.0255328	0.133833	0	0.012554	100536850		protein_coding
LOC100536860	38.7197	76.5344	0.905048	0.0117152	-6.41548	4.326e-11	7.26131e-09	Down	0	0.0238185	0.0489851	1.37717	1.39522	2.50484	100536860		protein_coding
LOC100536867	4.36951	3.9669	4.77212	1.22951	0.298082	0.818868	0.916117	Up	0.105257	0.0259721	0.293777	0.0254522	0.12678	0.131313	100536867		protein_coding
LOC100536900	11.8372	5.41793	18.2565	3.2806	1.71396	0.0423295	0.180551	Up	0.466998	0.704944	0.501848	0.106282	0.0330876	0.301582	100536900		protein_coding
LOC100536922	83.7982	103.253	64.3432	0.626664	-0.674235	0.0813264	0.270489	Down	0.513273	0.339954	0.61004	0.55525	0.748381	0.647073	100536922		protein_coding
LOC100536928	2.50008	1.72582	3.27433	1.86793	0.901443	0.523265	0.748257	Up	0.11871	0.117166	0.0240964	0.0688929	0.0285969	0.0236955	100536928		protein_coding
LOC100536949	5.83472	6.91332	4.75613	0.671733	-0.574039	0.621289	0.81252	Down	0.0192189	0.00632299	0.0260077	0.0526697	0.00385813	0.0127875	100536949		protein_coding
LOC100536981	215.509	210.281	220.736	1.04665	0.0657746	0.867421	0.941089	Up	1.25762	2.09863	1.41455	2.13814	0.765196	1.15163	100536981		protein_coding
LOC100536995	39.1501	30.1963	48.1039	1.58136	0.66117	0.568473	0.777375	Up	1.75578	0.767449	1.55288	2.18348	0	0.250334	100536995		protein_coding
LOC100537032	25.1634	28.2075	22.1194	0.791931	-0.336553	0.550133	0.764833	Down	0.380051	0.515774	0.273221	0.275701	0.476838	0.489936	100537032		protein_coding
LOC100537082	12.0682	14.588	9.5483	0.646672	-0.628895	0.395509	0.65227	Down	0.249007	0.28673	0.126362	0.521841	0.174956	0.207099	100537082		protein_coding
LOC100537098	11.0858	12.5681	9.60347	0.749098	-0.416773	0.602715	0.800052	Down	0.15346	0.328173	0.337459	0.470037	0.0924198	0.408424	100537098		protein_coding
LOC100537138	42.0597	36.116	48.0034	1.31454	0.394562	0.541299	0.759407	Up	1.11756	0.449379	0.672139	0.894115	0.132946	0.495717	100537138		protein_coding
LOC100537163	49.9466	61.9984	37.8948	0.606196	-0.722143	0.229153	0.492244	Down	0.457383	0.451434	0.442618	1.19345	0.166554	0.658188	100537163		protein_coding
LOC100537178	190.352	214.219	166.486	0.779358	-0.359641	0.455825	0.702308	Down	1.95605	1.66883	2.55726	2.36229	3.15468	1.02574	100537178		protein_coding
LOC100537194	1.39652	0.678862	2.11418	3.00013	1.58502	0.532748	0.754115	Up	0	0.108541	0.148817	0	0	0.0731704	100537194		protein_coding
LOC100537240	2.55655	4.20445	0.908652	0.211486	-2.24137	0.229608	0.492811	Down	0	0.0718924	0.0369634	0.176134	0	0.290787	100537240		protein_coding
LOC100537272	232.168	251.94	212.397	0.842326	-0.247549	0.594637	0.794065	Down	1.73289	2.69938	0.89467	2.79111	1.38846	1.38359	100537272		protein_coding			dre04145	Phagosome
LOC100537317	10.9324	9.15295	12.7118	1.43752	0.523577	0.599761	0.798255	Up	0.293372	0.115823	0.09528	0.0340513	0.197882	0.0468474	100537317		protein_coding
LOC100537321	30.124	44.6948	15.5533	0.350979	-1.51054	0.113946	0.331049	Down	0.118272	0.106121	0.338286	0.114397	0.94539	0.171694	100537321		protein_coding
LOC100537361	10.2996	12.2379	8.36135	0.671741	-0.574024	0.410474	0.664677	Down	0.10639	0.116674	0.107978	0.20581	0.0711917	0.153373	100537361		protein_coding
LOC100537363	1.29842	2.29276	0.304085	0.137788	-2.85948	0.265078	0.531974	Down	0	0.00582657	0	0.0114199	0	0.0294588	100537363		protein_coding
LOC100537377	45.2958	46.5449	44.0466	0.949334	-0.0750116	0.8399	0.928859	Down	1.25882	0.977667	0.816833	1.01798	0.84511	0.885626	100537377		protein_coding
LOC100537384	78.6054	100.772	56.4389	0.561513	-0.832609	0.124362	0.347705	Down	0.217939	0.516252	0.172038	0.33728	0.525007	0.49786	100537384		protein_coding			dre05168	Herpes simplex virus 1 infection
LOC100537399	14.3276	11.2505	17.4046	1.5837	0.6633	0.406575	0.660938	Up	0.13114	0.258869	0.458445	0.0845625	0.228158	0.130883	100537399		protein_coding
LOC100537428	167.526	207.894	127.158	0.614051	-0.703569	0.00929281	0.0667011	Down	1.2114	1.21297	1.31857	1.74059	1.86089	1.5507	100537428		protein_coding
LOC100537437	2.11933	2.72183	1.51682	0.541314	-0.885461	0.668533	0.840302	Down	0	0.238868	0.061407	0.468175	0	0.0603853	100537437		protein_coding
LOC100537439	6.84243	10.06	3.62481	0.361055	-1.46971	0.141606	0.37544	Down	0.0115187	0.0909509	0.0350717	0.0891306	0.110992	0.126457	100537439		protein_coding
LOC100537538	3.21163	6.42326	0	0.0254147	-5.29819	0.00410571	0.0389424	Down	0	0	0	0.0682806	0.021257	0.0792616	100537538		protein_coding			dre00562,dre04310,dre04371,dre04020,dre04070,dre04540,dre04621,dre04912,dre04916,dre04261,dre04270	Inositol phosphate metabolism|Wnt signaling pathway|Apelin signaling pathway|Calcium signaling pathway|Phosphatidylinositol signaling system|Gap junction|NOD-like receptor signaling pathway|GnRH signaling pathway|Melanogenesis|Adrenergic signaling in cardiomyocytes|Vascular smooth muscle contraction
LOC100537549	2.2844	2.80509	1.7637	0.613894	-0.70394	0.702817	0.859057	Down	0.028587	0	0.0145068	0.0414757	0	0.0213982	100537549		protein_coding
LOC100537553	17.7601	31.601	3.9191	0.124295	-3.00816	0.000936187	0.0134629	Down	0.0177878	0.079004	0.0180533	0.10323	0.321376	0.346181	100537553		protein_coding
LOC100537572	4.55357	6.39459	2.71255	0.416865	-1.26235	0.313628	0.581078	Down	0.0121882	0.0601483	0.0371102	0.0589444	0.0146804	0.158135	100537572		protein_coding
LOC100537584	1.47221	2.36305	0.58137	0.245619	-2.02551	0.329193	0.595515	Down	0.0331806	0	0	0.0641872	0.0199827	0.0331155	100537584		protein_coding
LOC100537585	6.41962	7.74501	5.09422	0.66225	-0.594553	0.519006	0.745891	Down	0.0317156	0.0547804	0.0482833	0.0843606	0.0668514	0.02374	100537585		protein_coding
LOC100537597	6.02457	12.0491	0	0.0135462	-6.20597	0.000259304	0.00532601	Down	0	0	0	0.364636	0.06727	0.0836104	100537597		protein_coding
LOC100537613	1011.47	1016.46	1006.49	0.990864	-0.0132406	0.936174	0.973442	Down	20.3688	17.7417	19.2429	17.5836	15.0474	16.7035	100537613		protein_coding
LOC100537633	551.697	278.208	825.187	2.96089	1.56603	0.000314047	0.00621358	Up	35.053	31.7575	14.3615	12.6929	4.4908	7.11989	100537633		protein_coding
LOC100537679	3.31799	3.67914	2.95685	0.787765	-0.344162	0.783991	0.899819	Down	0.230715	0.113857	0.0390263	0.185964	0.0463152	0.191885	100537679		protein_coding
LOC100537733	51.9673	30.3488	73.5858	2.39344	1.25909	0.0174436	0.101986	Up	2.93467	1.46063	1.8329	0.921915	0.271904	1.07644	100537733		protein_coding
LOC100537744	320.266	437.574	202.958	0.463781	-1.10848	0.000676342	0.0107034	Down	3.35501	5.99752	6.54823	10.0984	8.4777	10.8414	100537744		protein_coding
LOC100537842	49.258	85.3764	13.1396	0.153968	-2.6993	0.0187399	0.106955	Down	0.648934	0	0.101326	1.04613	0.420877	2.7235	100537842		protein_coding
LOC100537850	1.76772	0.5956	2.93984	4.44499	2.15218	0.295587	0.563807	Up	0.29578	0.0417048	0.0857699	0.0817402	0	0	100537850		protein_coding
LOC100537853	24.1931	20.7071	27.679	1.32237	0.403123	0.473103	0.714574	Up	0.126116	0.108916	0.0575991	0.0762402	0.0341784	0.0818145	100537853		protein_coding
LOC100537873	2.6111	2.84672	2.37548	0.806181	-0.310824	0.83486	0.926172	Down	0.101233	0.0749374	0.025686	0.122396	0	0.101034	100537873		protein_coding
LOC100537930	13.292	19.1097	7.47432	0.396374	-1.33506	0.222958	0.485045	Down	0.33427	0.513212	0.0753907	0.107773	1.2526	0.481886	100537930	interferon-induced protein with tetratricopeptide repeats 5-like	protein_coding
LOC100537936	17.0719	25.7619	8.38195	0.326272	-1.61585	0.00711675	0.0562691	Down	0.154425	0.247677	0.137139	0.410757	0.441755	0.558693	100537936		protein_coding
LOC100537949	2.3822	2.06525	2.69915	1.28048	0.356682	0.785563	0.900161	Up	0.0652391	0.128781	0.0993191	0.0946528	0.0392896	0.0651111	100537949		protein_coding
LOC100537972	15.4782	30.6523	0.304085	0.0104013	-6.58709	9.26363e-07	5.6291e-05	Down	0	0.00943436	0	0.379067	0.161185	0.324357	100537972		protein_coding
LOC100537993	27.9138	29.8931	25.9345	0.861637	-0.214848	0.631054	0.817757	Down	0.138498	0.109358	0.154622	0.151822	0.0889697	0.161264	100537993		protein_coding	GO:0005262,GO:0005509,GO:0016020,GO:0030246,GO:0050982	calcium channel activity|calcium ion binding|membrane|carbohydrate binding|detection of mechanical stimulus
LOC100538023	2.23165	4.16282	0.300481	0.075979	-3.71826	0.0980279	0.302367	Down	0	0	0.0240288	0.137399	0	0.165403	100538023		protein_coding
LOC100538037	38.2549	22.2321	54.2777	2.41685	1.27313	0.111839	0.327052	Up	1.62721	0.580337	0.305319	0.357104	0.0658805	0.4913	100538037		protein_coding
LOC100538044	55.45	43.7185	67.1815	1.53696	0.620078	0.149993	0.388592	Up	7.38775	3.99866	6.61115	2.76609	2.58341	4.59837	100538044		protein_coding
LOC100538089	166.136	233.481	98.7919	0.422734	-1.24218	0.0664302	0.239542	Down	2.53685	2.94203	1.50191	2.29016	1.55325	10.5706	100538089		protein_coding
LOC100538098	25.8349	34.9256	16.7443	0.480089	-1.05862	0.0352845	0.162263	Down	0.226248	0.322552	0.153083	0.437672	0.378488	0.439063	100538098		protein_coding
LOC100538121	42.9507	41.5754	44.326	1.06734	0.0940245	0.837304	0.927229	Up	0.335757	0.54941	0.421476	0.487136	0.340558	0.229277	100538121		protein_coding
LOC100538123	3.69979	6.21365	1.18594	0.196099	-2.35035	0.194932	0.450036	Down	0.0503899	0.0248673	0.025571	0.0243696	0.364162	0	100538123		protein_coding
LOC100538151	10.9271	4.45989	17.3944	4.01449	2.00522	0.0809574	0.26962	Up	0.0848627	0.0977189	0.645969	0.0136804	0.0851796	0.0705802	100538151		protein_coding
LOC100538158	17.0877	13.2506	20.9248	1.55649	0.638294	0.536763	0.7567	Up	0.51017	0.473915	1.12694	0.46443	0	0.748777	100538158		protein_coding
LOC100538170	7.40754	10.3326	4.48245	0.42854	-1.2225	0.225696	0.488602	Down	0.0413361	0.0407985	0.0734177	0.229896	0.0622356	0.0309412	100538170		protein_coding
LOC100538179	399.455	435.546	363.364	0.836265	-0.257967	0.357517	0.619601	Down	1.78665	1.85022	2.00122	1.75498	2.19659	1.69537	100538179		protein_coding
LOC100538212	4.60298	4.7261	4.47986	0.927125	-0.109165	0.912168	0.961827	Down	0.0929549	0.110095	0.0754737	0.143856	0.0447849	0.074218	100538212		protein_coding
LOC100538242	11.1683	4.91198	17.4247	3.41025	1.76988	0.0359796	0.163796	Up	0.391331	1.01827	0.649917	0.275281	0.0428501	0.213035	100538242		protein_coding
LOC100538248	37.9666	42.7933	33.1398	0.782888	-0.353122	0.545391	0.761925	Down	0.380166	0.302598	0.684555	0.308404	0.69424	0.428378	100538248		protein_coding
LOC100538255	28.066	12.8688	43.2632	3.32263	1.73233	0.00569519	0.0485134	Up	2.25075	0.912935	1.34557	0.328043	0.185684	0.646205	100538255		protein_coding
LOC100538279	4.70772	4.95361	4.46184	0.881995	-0.181157	0.879257	0.946459	Down	0.0409128	0.00807614	0.0747421	0.0554015	0.00985573	0.0571655	100538279		protein_coding
LOC100538283	116.702	137.654	95.7508	0.697315	-0.520118	0.267888	0.534806	Down	0.858919	1.0399	1.77834	0.897243	1.6001	1.89734	100538283		protein_coding
LOC100538302	753.876	427.696	1080.06	2.52197	1.33455	0.0224161	0.121149	Up	38.2246	26.1155	18.7935	17.4899	2.0677	10.4626	100538302		protein_coding
LOC100538327	2.11125	2.14851	2.07398	0.96265	-0.0549173	0.973948	0.987743	Down	0.123667	0	0.167351	0.0398721	0.0496517	0.164566	100538327		protein_coding
LOC100538332	148.652	126.735	170.57	1.34274	0.425183	0.197831	0.454185	Up	2.39208	2.47407	3.32911	1.6764	1.19044	2.38738	100538332		protein_coding
LOC100538333	10.7942	11.7629	9.82558	0.85338	-0.22874	0.766787	0.891	Down	0.37692	0.345445	0.163948	0.260408	0.421564	0.18809	100538333		protein_coding
LOC100538336	6.02878	5.17746	6.88011	1.3123	0.392101	0.686614	0.850655	Up	0.0636284	0.0628009	0.167903	0.110779	0.0459835	0.0381021	100538336		protein_coding
LOC100538338	16.5749	26.2455	6.90432	0.262904	-1.92739	0.00259791	0.0277372	Down	0.0931987	0.20697	0.236474	0.518337	0.505152	0.720872	100538338		protein_coding
LOC101882049	21.1931	24.4507	17.9354	0.747383	-0.42008	0.503968	0.736267	Down	0.178736	0.225415	0.191481	0.163276	0.346846	0.148654	101882049		protein_coding
LOC101882060	6.52813	7.68475	5.37151	0.684496	-0.546885	0.532579	0.75397	Down	0.0740107	0.0730482	0.0751153	0.167034	0.0445722	0.0738655	101882060		protein_coding
LOC101882063	7.59715	8.04208	7.15221	0.917189	-0.124709	0.906341	0.958712	Down	0.295288	0.259064	0.233096	0.190409	0.474224	0.0327454	101882063		protein_coding
LOC101882067	8.32229	9.73924	6.90533	0.726792	-0.460385	0.607629	0.803709	Down	0.0683426	0.161889	0.083235	0.0793244	0.197561	0.0818501	101882067		protein_coding
LOC101882069	4.45589	4.18144	4.73034	1.15614	0.209317	0.841523	0.929456	Up	0.0658827	0.0216753	0.0297182	0.028322	0.0352686	0.0219178	101882069		protein_coding
LOC101882070	83.719	57.0817	110.356	1.94188	0.957454	0.0658778	0.238474	Up	2.97669	2.25998	4.2089	0.639816	1.37898	2.03135	101882070		protein_coding
LOC101882071	77.586	93.5454	61.6265	0.663032	-0.592849	0.104427	0.313547	Down	0.47758	0.320289	0.472279	0.550768	0.619484	0.439978	101882071		protein_coding
LOC101882073	6.12749	5.01459	7.24038	1.41656	0.502391	0.756475	0.885914	Up	0	0.106164	0.218336	0.130049	0	0.0805137	101882073		protein_coding
LOC101882111	22.7063	21.2532	24.1594	1.15038	0.202113	0.754211	0.884759	Up	0.47551	0.469326	0.382757	0.126878	0.375245	0.458212	101882111		protein_coding
LOC101882122	4.91426	6.52221	3.30631	0.502284	-0.993423	0.407864	0.661879	Down	0.0122992	0.0364176	0.0873791	0.154651	0.0592564	0.0245501	101882122		protein_coding
LOC101882128	31.2141	44.6706	17.7576	0.395826	-1.33706	0.0228619	0.122396	Down	0.557591	0.159776	0.365105	0.991661	0.41163	0.969381	101882128		protein_coding
LOC101882134	55.0389	78.3964	31.6813	0.403507	-1.30933	0.162385	0.406618	Down	0.0175383	0.675098	1.157	1.62852	0.781608	1.62786	101882134		protein_coding
LOC101882151	8.39005	6.96791	9.81218	1.37072	0.454936	0.671665	0.841746	Up	1.15885	0.915025	0.470459	0.896711	0	0.771052	101882151		protein_coding
LOC101882159	110.218	135.326	85.1092	0.62709	-0.673256	0.202255	0.459246	Down	1.13384	1.98764	1.6832	4.35403	1.36568	1.1485	101882159		protein_coding
LOC101882185	503.395	257.085	749.704	2.91378	1.54289	0.000147904	0.00346939	Up	77.6439	65.7548	30.8878	16.9646	11.5231	23.1783	101882185		protein_coding
LOC101882195	210.564	170.912	250.216	1.46078	0.54674	0.320163	0.586993	Up	1.2735	1.72049	4.59251	2.36746	0.739754	1.50537	101882195		protein_coding
LOC101882211	96.9872	102.285	91.6898	0.901642	-0.149373	0.753471	0.884673	Down	2.00721	2.31789	1.83345	0.99014	2.49017	2.1435	101882211		protein_coding
LOC101882212	2.23838	1.23283	3.24393	2.46641	1.30241	0.41774	0.671519	Up	0.111951	0.03157	0.0324634	0.0464072	0	0.0159616	101882212		protein_coding
LOC101882213	148.252	231.931	64.573	0.278908	-1.84214	0.0023336	0.0258171	Down	0.883915	2.19169	1.55353	1.77247	6.69955	5.03488	101882213		protein_coding
LOC101882228	49.9639	47.9178	52.0101	1.09211	0.127121	0.793695	0.903663	Up	1.01981	1.39504	0.690023	0.553772	0.861997	0.9821	101882228		protein_coding
LOC101882231	8.89789	11.2419	6.55384	0.578666	-0.789198	0.272967	0.54034	Down	0.26982	0.199733	0.273847	0.424094	0.243745	0.437597	101882231		protein_coding
LOC101882235	49.7064	56.2295	43.1834	0.761396	-0.393281	0.381529	0.640223	Down	0.667831	0.52967	0.532555	1.09581	0.359102	0.547499	101882235		protein_coding
LOC101882237	19.9723	19.6651	20.2795	1.04716	0.0664779	0.898379	0.954597	Up	0.396582	0.340369	0.437501	0.300201	0.373833	0.275342	101882237		protein_coding
LOC101882239	91.3711	143.895	38.8474	0.269783	-1.89013	0.000751346	0.0115424	Down	0.39904	0.358046	0.822264	1.00586	1.07779	2.90848	101882239		protein_coding			dre00601	Glycosphingolipid biosynthesis - lacto and neolacto series
LOC101882251	7.63395	9.89279	5.37511	0.559089	-0.838851	0.36033	0.622161	Down	0.124887	0.143807	0.105626	0.120796	0.325919	0.103869	101882251		protein_coding
LOC101882255	8.85994	6.58978	11.1301	1.66627	0.73662	0.44522	0.694171	Up	0.0295167	0.0990517	0.0898717	0.0228398	0.0142209	0.0765929	101882255		protein_coding
LOC101882264	5.76255	4.41826	7.10684	1.6544	0.726312	0.540503	0.758892	Up	0.84554	0.536492	0.0612971	0.116834	0.363727	0.241109	101882264		protein_coding
LOC101882267	10.9272	10.5187	11.3358	1.0705	0.098286	0.92289	0.967143	Up	0.147487	0.092635	0.272161	0.0389061	0.0484488	0.321159	101882267		protein_coding
LOC101882297	45.1666	46.3921	43.9411	0.943078	-0.0845515	0.826457	0.920743	Down	1.23667	1.37317	1.94545	1.70453	1.04269	1.41939	101882297		protein_coding
LOC101882317	14.2414	11.5483	16.9346	1.50378	0.588596	0.432708	0.684406	Up	0.692075	0.26729	0.763482	0.203731	0.47116	0.270281	101882317		protein_coding
LOC101882320	1.98903	1.87006	2.10799	1.07352	0.102346	0.94984	0.978707	Up	0.00980861	0.0387242	0.01991	0.0379491	0	0.0195787	101882320		protein_coding
LOC101882350	1.8034	0	3.60679	17.7502	4.14977	0.069442	0.245909	Up	0.01673	0.0495374	0.135838	0	0	0	101882350		protein_coding
LOC101882351	2.24339	2.3824	2.10438	0.853487	-0.22856	0.90802	0.959713	Down	0.00524568	0.0155324	0.0159719	0.0405907	0	0	101882351		protein_coding
LOC101882355	419.153	478.3	360.006	0.752567	-0.410108	0.139877	0.373115	Down	12.094	8.39009	12.0023	11.4903	9.52827	15.8439	101882355		protein_coding
LOC101882365	47.406	51.2482	43.5638	0.854316	-0.227158	0.592076	0.792522	Down	0.893565	0.766908	1.18291	0.713981	0.9125	1.18262	101882365		protein_coding
LOC101882370	49.0869	57.3232	40.8506	0.710515	-0.493062	0.310421	0.578183	Down	0.295873	0.750922	0.386085	0.746113	0.445466	0.569493	101882370		protein_coding
LOC101882374	1.31609	2.63219	0	0.0620032	-4.01151	0.186458	0.43924	Down	0	0	0	0.0243061	0	0.07524	101882374		protein_coding
LOC101882375	19.5952	19.2238	19.9667	1.03976	0.0562481	0.949111	0.978415	Up	0.17635	0.0290094	0.457398	0.208478	0.165208	0.166226	101882375		protein_coding
LOC101882393	31.3783	39.8682	22.8884	0.575139	-0.798019	0.242629	0.506324	Down	0.123554	0.477628	0.177648	0.517862	0.434055	0.215796	101882393		protein_coding
LOC101882400	26.3815	33.1324	19.6307	0.594072	-0.75129	0.343112	0.608827	Down	0.137013	0.0245875	0.252832	0.132524	0.187533	0.261057	101882400		protein_coding
LOC101882402	4.27967	5.59011	2.96923	0.543901	-0.878583	0.457789	0.703452	Down	0.0800978	0.019764	0.101616	0.0387369	0.144714	0.119911	101882402		protein_coding
LOC101882414	48.6746	4.7807	92.5686	18.7893	4.23184	1.04973e-08	1.04846e-06	Up	0.721868	2.01413	1.53573	0.0402819	0.0167207	0.138548	101882414		protein_coding
LOC101882451	3.30686	4.54954	2.06418	0.458407	-1.1253	0.520947	0.746846	Down	0.0541479	0	0.041217	0.0916546	0.0815251	0	101882451		protein_coding			dre04020,dre04080	Calcium signaling pathway|Neuroactive ligand-receptor interaction
LOC101882452	3.01386	5.14587	0.881851	0.169118	-2.5639	0.184896	0.437168	Down	0.0118357	0	0.00600615	0.0858595	0	0.0118124	101882452		protein_coding
LOC101882460	95.7527	127.523	63.9825	0.501381	-0.99602	0.00301437	0.0310661	Down	0.587779	0.671735	0.952389	1.63575	1.093	1.07034	101882460		protein_coding
LOC101882461	58.0874	77.3208	38.854	0.504212	-0.987898	0.029748	0.145458	Down	0.587395	0.276074	0.359589	0.514042	0.640124	0.884016	101882461		protein_coding			dre00510,dre00513,dre04141	N-Glycan biosynthesis|Various types of N-glycan biosynthesis|Protein processing in endoplasmic reticulum
LOC101882464	6.7121	5.04325	8.38094	1.60305	0.680815	0.517807	0.745289	Up	0.0960295	0.135401	0.153156	0.172498	0.0165237	0.0273832	101882464		protein_coding
LOC101882465	3.31636	3.04191	3.5908	1.14955	0.201069	0.860424	0.938196	Up	0.102514	0.134907	0.173406	0.132207	0.0411586	0.136417	101882465		protein_coding
LOC101882475	8.93392	7.11143	10.7564	1.50272	0.587576	0.41532	0.669257	Up	0.220531	0.257237	0.244169	0.13574	0.0965908	0.18008	101882475		protein_coding
LOC101882480	1.95703	2.42403	1.49002	0.590782	-0.759302	0.662858	0.837312	Down	0.0621182	0.0613103	0.0315226	0.210291	0	0.0309981	101882480		protein_coding
LOC101882488	149.412	150.99	147.834	0.983201	-0.0244416	0.965181	0.984066	Down	1.12634	2.22338	1.38741	0.996324	2.20311	0.720594	101882488		protein_coding
LOC101882496	10.2358	0.339431	20.1323	50.8962	5.66949	0.147132	0.384246	Up	0	0	1.32168	0	0	0.0193984	101882496		protein_coding
LOC101882500	1772.28	2803.08	741.483	0.264597	-1.91813	9.55217e-05	0.0024574	Down	4.71864	7.31967	7.2191	11.6696	32.1535	14.8109	101882500		protein_coding
LOC101882501	4.66834	1.87938	7.45731	4.05906	2.02114	0.119842	0.340615	Up	0.295116	0.349533	0.089856	0.0856343	0.0710922	0	101882501		protein_coding
LOC101882530	1.31478	0	2.62956	12.963	3.69633	0.245696	0.509918	Up	0.0562102	0.00693489	0	0	0	0	101882530		protein_coding
LOC101882544	6.25436	5.04983	7.45889	1.45413	0.540158	0.692285	0.853816	Up	0.0959807	0.0828909	0.121766	0.0116046	0	0.167637	101882544		protein_coding
LOC101882555	7.5128	10.8802	4.14537	0.377433	-1.40571	0.114556	0.331807	Down	0.0758923	0.0214015	0.0550178	0.188758	0.0652934	0.0973843	101882555		protein_coding
LOC101882560	136.569	148.214	124.924	0.846578	-0.240286	0.613352	0.807991	Down	2.3094	1.3839	2.09274	1.90134	2.7154	1.00152	101882560		protein_coding
LOC101882564	177.975	225.226	130.725	0.582115	-0.780624	0.102749	0.310613	Down	3.92176	7.19455	7.48467	6.39086	12.8874	6.9347	101882564		protein_coding
LOC101882573	6.92266	6.35862	7.4867	1.1929	0.254468	0.772766	0.893526	Up	0.0818029	0.13841	0.0711632	0.0904263	0.0844543	0.0349896	101882573		protein_coding
LOC101882579	118.247	95.9647	140.53	1.4685	0.554342	0.130859	0.358277	Up	0.605945	0.662854	1.1121	0.410266	0.443991	0.519082	101882579		protein_coding
LOC101882592	6.93901	7.99114	5.88689	0.751934	-0.411321	0.716296	0.866727	Down	0.483784	0.136426	0.0701435	0.267392	0.41622	0.0689764	101882592		protein_coding
LOC101882596	185.449	217.611	153.286	0.705303	-0.503684	0.0927533	0.292401	Down	1.10262	1.61515	1.76743	1.76904	1.71808	1.93017	101882596		protein_coding
LOC101882607	4.389	3.43229	5.34572	1.58953	0.668599	0.549323	0.764409	Up	0.171473	0.131634	0.0386739	0.0368569	0.0688455	0.0760609	101882607		protein_coding
LOC101882614	13.5749	11.2125	15.9372	1.43952	0.525592	0.524442	0.748819	Up	0.137871	0.425244	0.349822	0.0666773	0.207579	0.258001	101882614		protein_coding
LOC101882617	3.34312	2.77278	3.91347	1.40437	0.489918	0.79472	0.904396	Up	0	0.0092884	0.0525318	0.0273075	0.0113351	0	101882617		protein_coding
LOC101882631	63.8856	66.5839	61.1874	0.911592	-0.133539	0.819365	0.916231	Down	0.906978	0.908543	0.96173	1.57122	0.211965	0.97275	101882631		protein_coding
LOC101882638	60.3717	70.2213	50.5222	0.722714	-0.468504	0.26726	0.534206	Down	0.766554	0.378292	0.722423	0.847362	0.778209	0.557393	101882638		protein_coding
LOC101882640	175.534	200.097	150.97	0.756529	-0.402532	0.237228	0.500304	Down	1.20092	1.31007	2.06195	1.6594	1.87064	1.55903	101882640		protein_coding
LOC101882642	130.179	47.0306	213.328	4.60896	2.20444	7.41279e-05	0.00202129	Up	1.76239	1.38095	1.67946	0.156152	0.510436	0.174551	101882642		protein_coding
LOC101882656	7.91643	7.73642	8.09645	1.02041	0.0291475	0.979976	0.99045	Up	0.175292	0.311422	0.462561	0.610378	0	0.244927	101882656		protein_coding
LOC101882666	169.616	256.212	83.0204	0.324044	-1.62574	0.0228612	0.122396	Down	0.164504	1.78601	1.52832	3.91667	3.33792	1.97017	101882666		protein_coding
LOC101882667	23.237	23.7706	22.7034	0.957572	-0.062547	0.905267	0.958413	Down	0.499131	0.610873	0.405264	0.347601	0.384764	0.617708	101882667		protein_coding
LOC101882691	28.8658	8.07585	49.6557	5.91773	2.56504	0.00255468	0.0274907	Up	0.625818	0.495768	0.25072	0.143364	0	0.0657463	101882691		protein_coding
LOC101882696	73.7211	66.8302	80.612	1.20244	0.265971	0.792416	0.903231	Up	5.81786	1.76906	0.447325	5.20096	0.49548	0.469208	101882696		protein_coding
LOC101882698	22.7371	27.7723	17.702	0.644878	-0.632901	0.514794	0.743422	Down	0.310833	0.660779	0.436807	0.393158	1.26717	0.0715899	101882698		protein_coding
LOC101882703	2.20842	1.42802	2.98882	2.08708	1.06149	0.487014	0.724938	Up	0.0462166	0.0228078	0.164172	0.0447026	0.0278335	0.023063	101882703		protein_coding
LOC101882721	43.6186	41.066	46.1712	1.12941	0.17557	0.713236	0.865212	Up	0.560197	0.976811	1.34559	0.794707	0.764713	0.615008	101882721		protein_coding
LOC101882750	28.5924	29.8011	27.3838	0.926356	-0.110361	0.874326	0.944696	Down	0.141583	0.520857	0.509469	0.373487	0.4961	0.19269	101882750		protein_coding
LOC101882757	34.2625	48.0271	20.498	0.424556	-1.23597	0.189692	0.443741	Down	0.278809	1.2008	0.231521	2.96643	0.427407	0.379448	101882757		protein_coding
LOC101882770	39.2238	27.1977	51.25	1.85364	0.890364	0.0716334	0.250737	Up	1.02255	0.723297	1.19348	0.725305	0.205274	0.459245	101882770		protein_coding
LOC101882780	1.5161	2.42403	0.60817	0.244505	-2.03206	0.429818	0.681571	Down	0	0.0276074	0	0.094692	0	0.0139581	101882780		protein_coding
LOC101882781	101.202	110.478	91.9265	0.828052	-0.272207	0.534498	0.755252	Down	1.50502	2.24824	2.49764	2.57701	1.00437	3.06502	101882781		protein_coding
LOC101882795	8.30661	8.25807	8.35515	0.987582	-0.0180271	0.985572	0.993496	Down	0.0561657	0.0609788	0.0399028	0.114084	0.0135301	0.0168167	101882795		protein_coding
LOC101882805	9.95839	10.9385	8.9783	0.807729	-0.308057	0.752952	0.884439	Down	0.266136	0.337724	0.540215	0.367739	0.0457936	0.834785	101882805		protein_coding
LOC101882826	98.7227	113.002	84.4438	0.744283	-0.426077	0.330625	0.597154	Down	0.976906	0.596497	0.781425	0.984941	0.418813	1.35507	101882826		protein_coding
LOC101882841	18.3483	32.5012	4.19537	0.128341	-2.96195	0.00220158	0.0249082	Down	0.0268657	0.0441938	0.0545333	0.13859	0.0647184	0.652449	101882841		protein_coding			dre04514	Cell adhesion molecules
LOC101882843	44.3991	60.6765	28.1217	0.464797	-1.10533	0.0526532	0.207233	Down	0.656586	1.04524	0.279452	1.37258	1.35209	0.908961	101882843		protein_coding
LOC101882859	1.45851	2.91702	0	0.0557832	-4.16403	0.0896097	0.285652	Down	0	0	0	0.048491	0.00862637	0.00714785	101882859		protein_coding
LOC101882863	4.91591	2.06525	7.76658	3.66495	1.87379	0.0684463	0.244019	Up	0.0737346	0.0818726	0.0841894	0.0267446	0.0111015	0.0183975	101882863		protein_coding
LOC101882869	7.93876	11.9558	3.92169	0.325077	-1.62115	0.125434	0.349342	Down	0.0213139	0.147257	0.10816	0.494776	0.179705	0.0850883	101882869		protein_coding
LOC101882892	3.97111	5.20905	2.73316	0.531162	-0.912777	0.544045	0.760994	Down	0	0.0746297	0.00959269	0.027426	0.0683058	0.0377323	101882892		protein_coding
LOC101882898	6.71923	6.03215	7.4063	1.24779	0.319379	0.716757	0.866727	Up	0.182645	0.0832014	0.0855558	0.0543574	0.0846124	0.0981543	101882898		protein_coding
LOC101882899	100.674	122.692	78.6569	0.643255	-0.636538	0.0519247	0.205298	Down	0.480767	0.649335	0.532884	0.832136	0.777178	0.593466	101882899		protein_coding
LOC101882900	7.92675	0.339431	15.5141	39.2457	5.29446	0.00898309	0.0652326	Up	0.906052	0	0.240841	0	0	0.0215303	101882900		protein_coding
LOC101882918	825.741	904.315	747.167	0.82698	-0.274076	0.270162	0.537177	Down	4.43734	4.67513	4.27025	5.15037	4.88749	3.67096	101882918		protein_coding
LOC101882921	19.1664	26.056	12.2768	0.47435	-1.07598	0.0501985	0.201081	Down	0.224939	0.363294	0.24905	0.514255	0.541868	0.448994	101882921		protein_coding
LOC101882926	5.96693	4.51156	7.42229	1.62097	0.696858	0.442949	0.692474	Up	0.240839	0.108048	0.199991	0.105886	0.0527428	0.131109	101882926		protein_coding
LOC101882982	23.7033	36.3538	11.0528	0.304313	-1.71637	0.0848116	0.277351	Down	0.112806	0.0159056	0.474314	0.28057	0.485259	0.884594	101882982		protein_coding
LOC101882990	3.8588	0	7.71759	38.0219	5.24876	0.00276319	0.0291544	Up	0.2142	0.146364	0.0668913	0	0	0	101882990		protein_coding
LOC101883001	88.993	82.6474	95.3386	1.15376	0.206347	0.784422	0.89989	Up	1.099	0.882227	2.72158	2.11182	1.20017	0.204744	101883001		protein_coding
LOC101883008	18.7215	17.7448	19.6981	1.10457	0.143491	0.777204	0.896097	Up	0.314685	0.295802	0.380216	0.31887	0.198541	0.254245	101883008		protein_coding
LOC101883013	76.233	83.2179	69.2481	0.836304	-0.2579	0.658886	0.835304	Down	1.15157	2.27319	0.779173	0.813286	1.93746	1.40472	101883013		protein_coding
LOC101883024	99.9433	84.5438	115.343	1.35709	0.440516	0.309972	0.577691	Up	0.531525	0.83938	1.04084	0.834677	0.31634	0.418145	101883024		protein_coding
LOC101883028	4.2276	5.74367	2.71154	0.479976	-1.05897	0.463617	0.707311	Down	0	0.0130317	0.0469018	0.0127709	0.0556615	0.0329439	101883028		protein_coding
LOC101883031	40.3485	41.5347	39.1622	0.940729	-0.0881486	0.820354	0.916788	Down	0.783323	1.0244	0.755263	0.833428	0.613273	0.899054	101883031		protein_coding
LOC101883054	1.81039	0.935031	2.68575	2.66255	1.41281	0.38345	0.641699	Up	0.0917425	0.0905493	0.0931116	0.059158	0	0.0305208	101883054		protein_coding
LOC101883059	497.88	630.365	365.396	0.580298	-0.785133	0.0308917	0.148794	Down	6.06412	9.25379	10.9561	11.1693	15.5148	11.0743	101883059		protein_coding
LOC101883071	82.7994	97.7708	67.8279	0.69501	-0.524895	0.156382	0.398844	Down	1.09544	1.06347	1.93197	1.63276	1.55737	1.81021	101883071		protein_coding
LOC101883074	9.87684	5.71573	14.038	2.39159	1.25797	0.14955	0.387755	Up	0.250431	0.308967	0.174741	0.0756959	0.0188524	0.171833	101883074		protein_coding	GO:0001525,GO:0001886,GO:0005886,GO:0016020,GO:0048514,GO:0071260	angiogenesis|endothelial cell morphogenesis|plasma membrane|membrane|blood vessel morphogenesis|cellular response to mechanical stimulus
LOC101883107	39.1113	56.8903	21.3324	0.375305	-1.41386	0.137635	0.369734	Down	0.696906	0.0436725	0.0673625	0.962965	0.519634	0.353289	101883107		protein_coding
LOC101883115	1.86019	3.11221	0.60817	0.19282	-2.37468	0.23816	0.500929	Down	0	0.0497717	0	0.146327	0.0607389	0.0251643	101883115		protein_coding
LOC101883131	9.24343	8.65868	9.82817	1.12036	0.163968	0.891907	0.951772	Up	0.128407	0.107239	0.090224	0.0382156	0	0.216878	101883131		protein_coding
LOC101883134	44.5615	50.5317	38.5912	0.762669	-0.390871	0.523986	0.748531	Down	0.631269	0.18461	0.711878	0.927191	0.464659	0.33835	101883134		protein_coding
LOC101883139	1.80118	0.893401	2.70895	2.81498	1.49312	0.448369	0.696322	Up	0.00743148	0.0293393	0.0301696	0.0215641	0	0	101883139		protein_coding
LOC101883163	1.75312	3.50624	0	0.0467369	-4.4193	0.0652195	0.237223	Down	0	0	0	0.0240465	0.0299446	0.198498	101883163		protein_coding
LOC101883176	3.29115	1.1912	5.3911	4.17435	2.06155	0.193715	0.449049	Up	0.0224887	0.0332944	0.0456487	0.021752	0	0	101883176		protein_coding
LOC101883185	1.87723	2.54892	1.20553	0.460546	-1.11858	0.568039	0.777053	Down	0	0.0191617	0.0591117	0.0751126	0	0.0775043	101883185		protein_coding
LOC101883187	16.3247	13.8842	18.7653	1.32382	0.40471	0.566406	0.775892	Up	0.465672	0.292483	0.580036	0.40947	0.0764854	0.401382	101883187	protein NLRC3-like	protein_coding
LOC101883188	7.55819	9.43358	5.6828	0.590804	-0.759248	0.518199	0.74539	Down	0.0441708	0.0653945	0.0298867	0.128171	0	0.0881683	101883188		protein_coding
LOC101883213	14.5487	19.5172	9.58028	0.497678	-1.00672	0.168677	0.414869	Down	0.13491	0.199733	0.205385	0.326226	0.446865	0.134645	101883213		protein_coding
LOC101883236	31.7815	33.9418	29.6211	0.881208	-0.182446	0.722027	0.868354	Down	0.152593	0.220534	0.165933	0.110696	0.196924	0.206684	101883236		protein_coding
LOC101883251	4.04773	1.91169	6.18377	3.0774	1.62171	0.226542	0.489824	Up	0.105835	0.0223839	0.0306897	0.0219359	0	0.0226343	101883251		protein_coding
LOC101883268	4.59101	2.02362	7.15841	3.42437	1.77584	0.104258	0.313232	Up	0.17116	0.147817	0.195428	0.0827762	0.0257698	0.021353	101883268		protein_coding
LOC101883270	33.7562	41.9866	25.5257	0.610948	-0.710879	0.433328	0.685001	Down	1.70404	0.0788379	0.540459	0.978626	1.44315	0.664333	101883270		protein_coding
LOC101883274	4.5588	8.81352	0.304085	0.0370848	-4.75303	0.00867305	0.0638414	Down	0	0.00880141	0	0.0258758	0.150371	0.0266997	101883274		protein_coding
LOC101883308	4.04073	0.976662	7.10481	6.82838	2.77154	0.0480799	0.19595	Up	0.122323	0.0301831	0.0931116	0.00985967	0	0.0203472	101883308		protein_coding
LOC101883319	101.023	74.2157	127.831	1.70898	0.773132	0.0633679	0.232846	Up	1.38415	2.1502	1.60026	1.1409	0.405922	1.10515	101883319		protein_coding
LOC101883320	21.9173	27.7906	16.0439	0.571141	-0.808081	0.220892	0.482844	Down	0.847716	0.436535	0.710739	1.24774	0.310757	1.50818	101883320		protein_coding
LOC101883325	5.15456	3.14453	7.1646	2.16559	1.11476	0.321234	0.587814	Up	0.0342803	0.029001	0.054673	0.0284206	0	0.0195503	101883325		protein_coding
LOC101883330	11.6524	11.4221	11.8826	1.02596	0.0369689	0.972896	0.98705	Up	0.403789	0.243551	0.250442	0.238676	0	0.537328	101883330		protein_coding
LOC101883331	58.9909	60.6872	57.2945	0.945362	-0.0810618	0.816865	0.915035	Down	0.515916	0.532352	0.452213	0.589745	0.423689	0.351071	101883331		protein_coding
LOC101883382	36.7302	23.7532	49.7072	2.11977	1.08391	0.10096	0.307521	Up	1.0776	0.537277	0.248053	0.204162	0.334524	0.188488	101883382		protein_coding
LOC101883383	3.00998	0.678862	5.3411	7.51052	2.90891	0.083994	0.27569	Up	0.170835	0.0632299	0.151711	0	0	0.0426249	101883383		protein_coding
LOC101883391	8.58886	2.67382	14.5039	5.24932	2.39213	0.0442922	0.185802	Up	0.49766	0.137532	0.343459	0.0192543	0	0.139071	101883391		protein_coding
LOC101883396	6.96193	3.28804	10.6358	3.39917	1.76518	0.104943	0.314552	Up	0.186115	0.0367389	0.113335	0.00900089	0.0448343	0.0278624	101883396		protein_coding
LOC101883412	30.0558	41.2479	18.8637	0.454748	-1.13686	0.0484179	0.196648	Down	0.232136	0.357995	0.32395	0.477128	0.297078	0.97016	101883412		protein_coding
LOC101883422	19.3987	20.5161	18.2812	0.903784	-0.14595	0.849759	0.932836	Down	0.686553	0.203287	0.1742	0.265625	0.47549	0.222692	101883422		protein_coding
LOC101883451	4.86053	3.72077	6.00029	1.57215	0.652736	0.541985	0.759839	Up	0.0232836	0.0505577	0.0189049	0.0180167	0.00560893	0.0278855	101883451		protein_coding
LOC101883456	3.79964	1.62321	5.97607	3.93834	1.97759	0.101074	0.30773	Up	0.101588	0.116978	0.120289	0.0163767	0.0407871	0.0168982	101883456		protein_coding
LOC101883459	62.248	57.8823	66.6136	1.15574	0.208819	0.581083	0.786478	Up	2.48767	2.41634	3.92746	1.98605	2.09269	2.40397	101883459		protein_coding
LOC101883469	85.8019	109.34	62.2642	0.569671	-0.8118	0.193816	0.449231	Down	0.247551	0.872612	1.32801	0.809539	1.09329	1.74122	101883469		protein_coding
LOC101883471	57.2205	63.819	50.6219	0.796154	-0.328881	0.670597	0.841245	Down	0.171704	0.148287	0.900375	0.242198	0.577355	0.428417	101883471		protein_coding
LOC101883491	40.5484	48.4194	32.6775	0.671272	-0.575031	0.215012	0.475128	Down	0.308834	0.540359	0.683877	0.787527	0.439619	0.756561	101883491		protein_coding
LOC101883505	1.61078	0.5956	2.62596	4.03948	2.01417	0.436703	0.687327	Up	0.284006	0	0.0360306	0.0686755	0	0	101883505		protein_coding
LOC101883506	7.29056	4.98227	9.59886	1.87881	0.909818	0.352024	0.615764	Up	0.0825458	0.14665	0.3016	0.159683	0.0397699	0.0494303	101883506		protein_coding
LOC101883520	3.20288	5.5105	0.895251	0.162614	-2.62047	0.0851091	0.277924	Down	0.072449	0.0715067	0.0735302	0.0700756	0.26179	0.795375	101883520		protein_coding
LOC101883537	3.09769	0.492987	5.70239	14.406	3.8486	0.0246955	0.128452	Up	0.240722	0.53458	0.366471	0	0.0724861	0	101883537		protein_coding			dre04060,dre04620	Cytokine-cytokine receptor interaction|Toll-like receptor signaling pathway
LOC101883549	123.546	210.73	36.3621	0.172313	-2.53689	1.10131e-07	8.54267e-06	Down	0.32018	0.877823	0.956823	3.20014	2.63528	4.95305	101883549		protein_coding
LOC101883594	177.564	240.847	114.281	0.474615	-1.07517	0.548461	0.763741	Down	2.04116	0	2.52404	1.77005	3.80084	2.13081	101883594		protein_coding
LOC101883602	61.3799	89.3922	33.3676	0.371568	-1.4283	0.0419478	0.179483	Down	0.106502	0.315352	0.424646	1.06692	0.164931	0.835162	101883602		protein_coding
LOC101883622	83.6269	112.707	54.5464	0.485989	-1.041	0.0101729	0.0711475	Down	0.294735	0.519468	0.462945	0.719487	0.879054	0.616329	101883622		protein_coding
LOC101883625	17.6899	20.7064	14.6735	0.709145	-0.495847	0.386861	0.644678	Down	0.188419	0.270499	0.382462	0.314789	0.288841	0.410289	101883625		protein_coding
LOC101883642	6.65266	9.99541	3.30991	0.336402	-1.57174	0.133348	0.36245	Down	0.0178066	0.0702999	0.108434	0.137786	0.257372	0.0888581	101883642		protein_coding
LOC101883659	88.4512	56.7751	120.127	2.11011	1.07732	0.260285	0.527107	Up	0.130415	1.39982	5.02974	1.34027	0.3338	1.10635	101883659		protein_coding
LOC101883670	2.75942	5.21836	0.300481	0.0629299	-3.99011	0.0397043	0.173732	Down	0	0	0.0193917	0.0369612	0.184107	0.0381381	101883670		protein_coding
LOC101883686	12.5988	17.3517	7.84596	0.449137	-1.15477	0.24401	0.507654	Down	0.0152283	0.180363	0.200923	0.191483	0.110053	0.471152	101883686		protein_coding
LOC101883703	12.5526	17.7685	7.33671	0.409742	-1.28721	0.232343	0.495771	Down	0.167396	0.0260873	0.0268255	0.24713	0.0212238	0.211033	101883703		protein_coding
LOC101883704	761.53	879.702	643.357	0.731541	-0.45099	0.067079	0.240821	Down	4.44498	4.70002	6.76324	6.60234	5.63801	6.30493	101883704		protein_coding
LOC101883708	4103.28	5141.1	3065.47	0.596308	-0.74587	0.222578	0.484575	Down	177.617	33.4927	46.2879	72.4717	138.878	140.322	101883708		protein_coding
LOC101883751	641.826	803.573	480.079	0.597882	-0.742067	0.191598	0.446318	Down	1.73134	2.96604	5.24017	2.73921	7.41796	3.20287	101883751		protein_coding			dre04910	Insulin signaling pathway
LOC101883776	56.2595	53.6284	58.8906	1.10253	0.140818	0.868311	0.941401	Up	1.04021	0.109085	0.15836	0.176073	0.422857	0.35687	101883776		protein_coding
LOC101883779	15.9652	15.4586	16.4718	1.06761	0.0943859	0.904873	0.958216	Up	0.271174	0.321177	0.908231	0.209833	0.326624	0.649542	101883779		protein_coding
LOC101883783	791.651	968.366	614.935	0.635719	-0.653539	0.0552582	0.213195	Down	8.72851	8.3024	9.10307	9.98649	15.1062	8.85046	101883783		protein_coding
LOC101883792	11.1727	10.9534	11.3919	1.04254	0.0601036	0.938874	0.97437	Up	0.0539173	0.0798241	0.209768	0.0956102	0.0865898	0.0986544	101883792		protein_coding
LOC101883801	5.96292	6.21365	5.71219	0.947851	-0.0772684	0.959671	0.981737	Down	0.0552557	0.163611	0.130854	0.0178152	0.266217	0	101883801		protein_coding
LOC101883813	14.9544	6.92556	22.9833	3.33892	1.73938	0.00414844	0.0391483	Up	0.765294	0.813444	0.687094	0.199291	0.177266	0.205636	101883813		protein_coding
LOC101883815	937.89	1126.3	749.479	0.665949	-0.586517	0.022497	0.121391	Down	4.93186	5.80756	5.73862	7.47621	7.63304	5.79388	101883815		protein_coding
LOC101883825	13.1189	20.0246	6.21316	0.309846	-1.69038	0.0178422	0.103577	Down	0.365885	0.0984891	0.236311	0.900833	0.480765	0.564349	101883825		protein_coding
LOC101883854	312.175	457.062	167.289	0.365823	-1.45078	0.000141781	0.00336431	Down	3.6876	9.11677	7.1219	19.9117	13.0662	14.3641	101883854		protein_coding
LOC101883865	22.1243	28.7134	15.5352	0.535338	-0.901478	0.276188	0.544156	Down	0.165858	0.218267	0.0935182	0.418885	0.0332954	0.358653	101883865		protein_coding
LOC101883867	33.3478	26.4542	40.2414	1.50854	0.593157	0.29094	0.559058	Up	1.26869	1.32176	0.572277	0.999881	0.396177	0.445515	101883867		protein_coding
LOC101883900	8.24143	3.48396	12.9989	3.5582	1.83115	0.0829704	0.273646	Up	0.577875	0.197432	0.203019	0.128987	0	0.110912	101883900		protein_coding
LOC101883902	9.52243	11.2613	7.78358	0.680128	-0.556121	0.4468	0.695257	Down	0.213293	0.330816	0.247401	0.501028	0.183505	0.334517	101883902		protein_coding
LOC101883913	45.1844	62.7922	27.5766	0.441316	-1.18012	0.183053	0.434565	Down	0.418528	0.605857	1.5575	0.24289	2.75579	1.61513	101883913		protein_coding
LOC101883936	13.5561	9.23766	17.8746	1.89528	0.922407	0.138027	0.370232	Up	0.502875	0.383532	0.487181	0.287419	0.110128	0.228131	101883936		protein_coding
LOC101883939	805.472	1016.41	594.536	0.585467	-0.77234	0.00367329	0.0359225	Down	5.17976	5.37946	4.84121	6.16912	7.89642	8.01673	101883939		protein_coding
LOC101883942	5.22045	6.31771	4.12319	0.642866	-0.637411	0.659765	0.835642	Down	0.38806	0.153205	0	0.563021	0.0467411	0.154919	101883942		protein_coding
LOC101883960	17.0909	18.43	15.7517	0.849211	-0.235805	0.704102	0.860094	Down	0.44791	0.313143	0.227297	0.541546	0.24727	0.223516	101883960		protein_coding			dre04514	Cell adhesion molecules
LOC101883994	80.5107	62.8124	98.209	1.55729	0.639038	0.131012	0.358433	Up	6.87251	3.73072	3.61832	2.70049	1.60382	3.55812	101883994		protein_coding			dre04060,dre04620	Cytokine-cytokine receptor interaction|Toll-like receptor signaling pathway
LOC101883999	197.297	243.629	150.965	0.619595	-0.690603	0.144864	0.380723	Down	3.24566	2.70095	2.11533	6.2325	3.44941	1.60377	101883999		protein_coding
LOC101884022	8.76766	7.35463	10.1807	1.37725	0.461791	0.63979	0.823443	Up	0.344822	0.618796	0.0954459	0.394167	0.188787	0.0938579	101884022		protein_coding
LOC101884045	76.4272	122.334	30.5204	0.250371	-1.99786	0.0176823	0.103085	Down	1.06614	1.72191	0.491843	0.812474	7.27684	2.1281	101884045		protein_coding
LOC101884052	4.26792	6.15777	2.37807	0.379787	-1.39674	0.32414	0.590667	Down	0.0441323	0.0145195	0.0597213	0.099602	0	0.176183	101884052		protein_coding
LOC101884065	35.7777	29.4158	42.1397	1.4216	0.507511	0.246226	0.510449	Up	0.59602	0.771285	0.497375	0.525251	0.271205	0.343691	101884065		protein_coding
LOC101884073	271.623	368.699	174.546	0.473494	-1.07858	0.00242592	0.026495	Down	0.554332	1.04667	1.20838	1.96286	1.60244	1.52022	101884073		protein_coding
LOC101884100	2.79586	4.39598	1.19573	0.273403	-1.8709	0.189721	0.443747	Down	0.00666954	0.0065828	0.0135382	0.0451573	0.0321333	0.00665645	101884100		protein_coding
LOC101884106	11.9765	15.671	8.28196	0.521358	-0.939654	0.278895	0.546788	Down	0.510085	0.22026	0.16178	0.801733	0.115198	0.604537	101884106		protein_coding
LOC101884131	5.97797	10.169	1.7869	0.175282	-2.51225	0.0224163	0.121149	Down	0.0274705	0.0135566	0.0418207	0.239135	0.115807	0.0548332	101884131		protein_coding
LOC101884135	4.80319	3.95759	5.64879	1.42376	0.509707	0.622254	0.812816	Up	0.075213	0.0463967	0.0572516	0.0181873	0.0226481	0.0656822	101884135		protein_coding
LOC101884142	3.84052	2.06525	5.6158	2.66681	1.41512	0.228514	0.491596	Up	0.304904	0.109432	0.112529	0.0804316	0.0333865	0.0553284	101884142		protein_coding
LOC101884146	187.194	195.282	179.106	0.916133	-0.126371	0.560801	0.772432	Down	6.6445	5.67185	5.68047	6.42682	4.50629	5.94441	101884146		protein_coding
LOC101884151	2.8344	1.53063	4.13816	2.58316	1.36914	0.457448	0.703387	Up	0.139345	0	0.141424	0.077017	0	0.0198673	101884151		protein_coding
LOC101884166	3.51959	1.32541	5.71376	4.66419	2.22163	0.179183	0.429745	Up	0.004599	0.0181567	0.0653468	0	0.0110788	0.00458997	101884166		protein_coding
LOC101884172	71.3658	75.3377	67.3939	0.890644	-0.167079	0.716697	0.866727	Down	0.687251	1.00334	1.54033	1.64799	0.707063	0.828799	101884172		protein_coding
LOC101884175	21.8062	12.5171	31.0952	2.4266	1.27894	0.114871	0.33192	Up	1.57763	1.55711	3.45853	1.28179	0.0760088	1.07068	101884175		protein_coding			dre04060	Cytokine-cytokine receptor interaction
LOC101884177	20.6817	20.3273	21.0361	1.04455	0.0628801	0.934097	0.972646	Up	0.208008	0.568529	0.341027	0.38691	0.423992	0.0958151	101884177		protein_coding
LOC101884194	7.49106	7.20473	7.77739	1.05128	0.0721475	0.938642	0.974203	Up	0.211835	0.31362	0.161247	0.256119	0.0318939	0.290702	101884194		protein_coding
LOC101884203	542.051	564.386	519.715	0.920229	-0.119934	0.6791	0.846659	Down	5.58204	7.23529	6.66645	8.8902	4.87383	4.68732	101884203		protein_coding
LOC101884208	43.9848	34.0674	53.9023	1.58916	0.668261	0.197573	0.454084	Up	2.05215	1.11074	2.85542	0.768358	0.996684	1.42047	101884208		protein_coding
LOC101884217	4.87704	4.04651	5.70757	1.4686	0.554445	0.706586	0.861622	Up	0.0110439	0.0272507	0.0672524	0.0106821	0.0465576	0	101884217		protein_coding
LOC101884245	2.82978	3.85205	1.80751	0.456282	-1.132	0.431804	0.683503	Down	0.00506773	0.0200073	0.00514336	0.0441154	0.00610398	0.0101156	101884245		protein_coding
LOC101884250	1.90304	1.42802	2.37807	1.66253	0.73338	0.626645	0.815276	Up	0.255123	0.0839349	0.34524	0.16451	0.10243	0.084874	101884250		protein_coding
LOC101884251	7.39604	4.69744	10.0946	2.08968	1.06328	0.245244	0.50939	Up	0.174087	0.0801839	0.141348	0.0561279	0.0139789	0.0926641	101884251		protein_coding
LOC101884253	231.723	327.37	136.076	0.416286	-1.26435	0.00845311	0.0630611	Down	1.26754	2.00168	3.5264	3.38957	5.92728	4.15234	101884253		protein_coding
LOC101884284	17.6549	7.97962	27.3301	3.33277	1.73672	0.0991352	0.30427	Up	0.348653	0.221219	0.193778	0.192704	0.0099987	0.00828497	101884284		protein_coding
LOC101884285	6.40428	3.79107	9.01749	2.34128	1.2273	0.239467	0.502285	Up	0.0424136	0.125586	0.25828	0.0820483	0.0340576	0.0423304	101884285		protein_coding
LOC101884287	46.5039	46.1874	46.8205	1.00945	0.0135717	0.98	0.99045	Up	0.423824	0.209156	0.1836	0.394942	0.161862	0.149595	101884287		protein_coding
LOC101884295	53.3501	52.4904	54.2099	1.03979	0.0562932	0.883301	0.948568	Up	0.700398	0.551028	0.597527	0.392727	0.501279	0.607847	101884295		protein_coding
LOC101884310	8.01403	8.0744	7.95366	1.00921	0.0132328	0.989802	0.99544	Up	0.203021	0.0235742	0.0969652	0.0693071	0.143844	0.0476759	101884310		protein_coding
LOC101884314	5.49927	5.60946	5.38907	0.966098	-0.0497591	0.972187	0.986663	Down	0.0698267	0	0.566951	0.202618	0.210262	0.139379	101884314		protein_coding
LOC101884319	8.09512	7.02744	9.1628	1.34894	0.431822	0.659122	0.835377	Up	0.662749	0.153913	0.395671	0.113124	0.422613	0.194544	101884319		protein_coding
LOC101884329	9.1582	5.12579	13.1906	2.63388	1.39719	0.226201	0.489415	Up	0.829061	0.13638	0.0701195	0.111375	0.166431	0.0459686	101884329		protein_coding
LOC101884357	52.532	57.3455	47.7184	0.829688	-0.269359	0.405264	0.65982	Down	0.293669	0.263499	0.298051	0.351187	0.231525	0.30375	101884357		protein_coding
LOC101884360	2.4721	1.38639	3.55781	2.53667	1.34294	0.374157	0.634567	Up	0.0787893	0.0388823	0.0399826	0.0381041	0.0158167	0	101884360		protein_coding			dre00230,dre04371,dre04020,dre04114,dre04540,dre04912,dre04914,dre04916,dre04261,dre04270	Purine metabolism|Apelin signaling pathway|Calcium signaling pathway|Oocyte meiosis|Gap junction|GnRH signaling pathway|Progesterone-mediated oocyte maturation|Melanogenesis|Adrenergic signaling in cardiomyocytes|Vascular smooth muscle contraction
LOC101884367	6.34677	8.28328	4.41027	0.533823	-0.905567	0.397693	0.653923	Down	0.0485075	0.0130573	0.00447559	0.0298572	0.0265574	0.0484123	101884367		protein_coding
LOC101884374	81.7338	106.702	56.7657	0.535044	-0.90227	0.00621366	0.0514739	Down	0.442942	0.51869	0.464792	0.726156	0.831922	0.696827	101884374		protein_coding
LOC101884382	29.8723	31.3662	28.3785	0.89899	-0.153622	0.802319	0.90813	Down	0.876493	0.272344	0.41184	0.81638	0.293255	0.404988	101884382		protein_coding
LOC101884416	14.9273	22.3798	7.47488	0.337995	-1.56493	0.0354466	0.162534	Down	0.145523	0.14363	0.320004	0.28151	0.671903	0.532536	101884416		protein_coding
LOC101884430	5.61729	7.73296	3.50162	0.452398	-1.14434	0.49602	0.730905	Down	0.189864	0.0170359	0	0.0166949	0.0415795	0.327303	101884430		protein_coding			dre04512	ECM-receptor interaction
LOC101884462	2.24778	4.19148	0.304085	0.0752242	-3.73266	0.0556107	0.214261	Down	0	0.0244656	0	0.215783	0.0298566	0.074218	101884462		protein_coding
LOC101884467	82.1625	101.608	62.717	0.61698	-0.696704	0.0236618	0.125007	Down	0.547608	0.634484	0.483287	0.782988	0.630905	0.902968	101884467		protein_coding
LOC101884469	199.436	306.342	92.53	0.30273	-1.7239	6.97918e-05	0.00192862	Down	0.457758	0.680802	0.801895	1.38287	2.46224	1.43316	101884469		protein_coding
LOC101884473	8.37989	7.88925	8.87054	1.12651	0.171855	0.854716	0.935382	Up	0.492066	0.242833	0.083235	0.317298	0.197561	0.109134	101884473		protein_coding
LOC101884484	33.7897	24.3921	43.1874	1.7703	0.823993	0.27239	0.539667	Up	0.539748	1.14537	0.246511	0.15662	0.22754	0.552156	101884484		protein_coding
LOC101884488	3.44442	1.23283	5.656	4.22071	2.07749	0.123831	0.347032	Up	0.104201	0.0899904	0.0528782	0.0377954	0	0.0129996	101884488		protein_coding			dre04512	ECM-receptor interaction
LOC101884504	4.92286	3.29808	6.54765	1.91348	0.936202	0.350233	0.614468	Up	0.286112	0.219637	0.193588	0.184493	0.0382907	0.0951835	101884504		protein_coding
LOC101884507	1.92734	1.489	2.36568	1.53532	0.618536	0.79558	0.90486	Up	0.121794	0.0721259	0	0.117804	0	0	101884507		protein_coding
LOC101884517	125.666	123.938	127.393	1.02729	0.0388468	0.914084	0.962942	Up	2.20053	2.58281	3.68204	2.07091	1.81475	3.16571	101884517		protein_coding
LOC101884520	21.8176	25.2086	18.4266	0.728461	-0.457075	0.375996	0.636125	Down	0.495948	0.308203	0.335567	0.444168	0.309742	0.586637	101884520		protein_coding
LOC101884524	71.4472	80.62	62.2744	0.776692	-0.364585	0.348817	0.613443	Down	0.648033	0.953136	1.04459	1.0078	1.10194	0.773577	101884524		protein_coding
LOC101884526	1.93231	3.25645	0.60817	0.18231	-2.45554	0.217856	0.478112	Down	0	0.0535726	0	0.183751	0.0326887	0.054172	101884526		protein_coding
LOC101884528	57.0047	64.5996	49.4099	0.766797	-0.383083	0.313945	0.581271	Down	0.873135	0.639806	0.684765	1.07486	0.796723	0.580948	101884528		protein_coding
LOC101884556	25.6109	23.6973	27.5245	1.15392	0.206537	0.666881	0.839257	Up	0.160704	0.211485	0.244654	0.161916	0.104848	0.193803	101884556		protein_coding
LOC101884563	8.54561	8.77627	8.31495	0.952299	-0.070514	0.926128	0.969147	Down	0.196726	0.119488	0.10751	0.102459	0.109363	0.166134	101884563		protein_coding
LOC101884570	27.9582	15.6379	40.2785	2.56268	1.35765	0.0034683	0.0343856	Up	0.653443	0.685254	0.497396	0.263349	0.163971	0.190214	101884570		protein_coding
LOC101884586	328.297	457.2	199.395	0.435975	-1.19768	0.154087	0.395067	Down	4.39832	0.707696	0.834219	3.17164	0.674059	8.07248	101884586		protein_coding
LOC101884616	8.92033	5.68341	12.1573	2.12681	1.08869	0.183257	0.434748	Up	0.868855	0.490032	0.335932	0.200093	0.149503	0.330343	101884616		protein_coding
LOC101884620	1.19439	0.2978	2.09098	5.28549	2.40204	0.261793	0.528593	Up	0.0881494	0.087003	0.134197	0.0426308	0	0	101884620		protein_coding
LOC101884621	3.17657	3.94828	2.40487	0.595777	-0.747156	0.621855	0.812622	Down	0.0347695	0.102952	0.141154	0.100891	0	0.312312	101884621		protein_coding
LOC101884623	20.3292	20.954	19.7044	0.936844	-0.0941196	0.938666	0.974203	Down	1.0945	0	4.5288	2.28016	0.709858	2.26874	101884623		protein_coding
LOC101884641	15.6796	12.2157	19.1435	1.52944	0.613006	0.362494	0.623628	Up	0.545571	0.696851	0.814284	0.713945	0.154619	0.320294	101884641		protein_coding
LOC101884647	4.17844	7.75231	0.604566	0.0766304	-3.70594	0.0249143	0.129033	Down	0	0.0145766	0.0149891	0.0714244	0.0177886	0.250575	101884647		protein_coding
LOC101884649	8.90786	10.7073	7.10841	0.657834	-0.604204	0.442221	0.691916	Down	0.161989	0.0532941	0.109604	0.182796	0.0812969	0.161671	101884649		protein_coding
LOC101884650	11.3741	13.0066	9.74158	0.74608	-0.422598	0.679121	0.846659	Down	0.230925	0.0683765	0.08203	0.044672	0.0556289	0.334184	101884650		protein_coding
LOC101884653	29.9274	49.4051	10.4497	0.210525	-2.24794	2.41905e-05	0.000816101	Down	0.11572	0.133251	0.088085	0.727537	0.33684	0.336853	101884653		protein_coding
LOC101884686	9.32354	10.5594	8.08767	0.768623	-0.379653	0.641486	0.824434	Down	0.153162	0.259148	0.177654	0.338615	0.237189	0.0873493	101884686		protein_coding
LOC101884708	1.79133	1.1912	2.39147	1.88836	0.917136	0.63526	0.820138	Up	0.0711512	0.0702258	0.144426	0.137641	0	0	101884708		protein_coding
LOC101884710	6.69276	4.78708	8.59843	1.73279	0.793095	0.430269	0.681969	Up	0.182212	0.0770751	0.118884	0.138476	0.0156765	0.0389687	101884710		protein_coding
LOC101884715	2.04436	2.32142	1.76731	0.746668	-0.421462	0.78456	0.89989	Down	0.0381914	0.00942368	0.00969035	0.0461754	0.0115002	0.00952912	101884715		protein_coding
LOC101884718	26.5868	39.1558	14.0179	0.361846	-1.46655	0.0341198	0.158644	Down	0.483784	0.306959	0.841722	0.668479	1.91461	1.06913	101884718		protein_coding
LOC101884727	18.7764	23.606	13.9467	0.583968	-0.776039	0.412172	0.666334	Down	0.113709	0.0561151	0.0734402	0.299956	0.0124509	0.0722183	101884727		protein_coding
LOC101884738	1.59113	0.790788	2.39147	3.18798	1.67264	0.353627	0.617099	Up	0.0435067	0.0429409	0.0883121	0.0210407	0.0262015	0	101884738		protein_coding
LOC101884739	32.8951	36.249	29.5412	0.813896	-0.297084	0.62766	0.815818	Down	0.765202	0.221366	0.334751	0.395589	0.301926	0.684697	101884739		protein_coding
LOC101884748	5.32068	4.7261	5.91527	1.23267	0.301791	0.788544	0.901388	Up	0.146788	0.0144879	0.134081	0.113583	0.0353606	0.0586	101884748		protein_coding
LOC101884750	138.81	140.799	136.822	0.968554	-0.0460963	0.908468	0.959852	Down	0.630101	1.32406	1.13461	1.17305	0.554927	1.07516	101884750		protein_coding
LOC101884755	493.461	322.767	664.154	2.05443	1.03874	0.000344346	0.00666495	Up	21.9124	13.4346	14.5621	9.56131	4.94535	6.56974	101884755		protein_coding			dre00061,dre00062	Fatty acid biosynthesis|Fatty acid elongation
LOC101884756	5.12625	9.06037	1.19213	0.133989	-2.89982	0.0336526	0.157301	Down	0.00517413	0	0.0157541	0.0300278	0.0747857	0.0206559	101884756		protein_coding
LOC101884757	13.0002	13.8354	12.165	0.880382	-0.183799	0.818752	0.916097	Down	0.211448	0.0695661	0.202681	0.079536	0.113193	0.269654	101884757		protein_coding
LOC101884775	38.5331	46.0798	30.9864	0.666556	-0.585203	0.293924	0.562102	Down	0.374827	0.361144	0.190211	0.6992	0.182739	0.356278	101884775		protein_coding
LOC101884800	7.35723	10.8222	3.8923	0.36135	-1.46853	0.116079	0.333716	Down	0.037182	0.0642222	0.0188684	0.0539458	0.0895699	0.139159	101884800		protein_coding			dre00561,dre03320	Glycerolipid metabolism|PPAR signaling pathway
LOC101884804	4190.48	5093.47	3287.49	0.645346	-0.631855	0.0167048	0.0992631	Down	97.8606	120.967	150.685	223.393	119.731	156.283	101884804		protein_coding
LOC101884840	14.4374	21.7922	7.08262	0.325692	-1.61842	0.0618649	0.229464	Down	0.202002	0.0664582	0.0546711	0.130256	0.194646	0.510734	101884840		protein_coding
LOC101884852	29.7823	25.9161	33.6485	1.29211	0.36973	0.387653	0.645499	Up	1.23028	0.903651	1.10345	0.774869	0.516924	0.856652	101884852		protein_coding
LOC101884860	2.94575	3.50624	2.38527	0.67318	-0.570936	0.679479	0.846755	Down	0.0460799	0.0454806	0.0311784	0.0148568	0.0185008	0.122639	101884860		protein_coding
LOC101884866	5.14904	4.94357	5.3545	1.10096	0.138758	0.890068	0.951567	Up	0.115734	0.0652735	0.117461	0.0319836	0.0796567	0.115507	101884866		protein_coding
LOC101884874	1.61194	0.832418	2.39147	3.08571	1.6256	0.366987	0.628042	Up	0.0490715	0.0484333	0.0996078	0	0.0295529	0.0244876	101884874		protein_coding
LOC101884879	16.5768	22.6796	10.474	0.457331	-1.12869	0.180973	0.431779	Down	0.222113	0.358731	0.122961	0.996062	0.218889	0.181372	101884879		protein_coding
LOC101884895	388.198	387.084	389.312	1.00649	0.00933675	0.985918	0.993653	Up	5.77281	5.64972	9.77592	2.25857	6.13291	9.03064	101884895		protein_coding	GO:0002377,GO:0005615,GO:0006955,GO:0016020	immunoglobulin production|extracellular space|immune response|membrane
LOC101884896	13.5905	10.7619	16.4192	1.50859	0.5932	0.437759	0.688406	Up	0.264448	0.191407	0.518897	0.153471	0.0849394	0.316715	101884896		protein_coding
LOC101884906	3.82994	3.7624	3.89748	1.01687	0.0241409	0.984267	0.99282	Up	0.0260102	0.0385079	0.105593	0.0377372	0.0156644	0.090857	101884906		protein_coding
LOC101884909	3.21235	4.92129	1.50342	0.302685	-1.72411	0.16846	0.414557	Down	0.00930574	0.0275541	0.00944462	0.0630062	0.0336257	0.0371499	101884909		protein_coding			dre04140,dre04920	Autophagy - animal|Adipocytokine signaling pathway
LOC101884910	19.7327	36.7357	2.72956	0.0741681	-3.75306	0.00616721	0.0511926	Down	0	0.0759294	0.022308	0.595277	0.529489	0.0109684	101884910		protein_coding
LOC101884915	5.04171	4.06659	6.01684	1.45775	0.543739	0.779097	0.897062	Up	0	0.00961678	0.0890002	0.0565458	0.00586793	0	101884915		protein_coding
LOC101884921	1257.77	1460.95	1054.58	0.722107	-0.469715	0.183438	0.435076	Down	6.41813	7.12791	6.7295	4.94187	8.16613	10.3589	101884921		protein_coding			dre00564,dre00565	Glycerophospholipid metabolism|Ether lipid metabolism
LOC101884923	33.2261	40.6827	25.7695	0.632889	-0.659976	0.213306	0.473454	Down	0.381148	0.158836	0.197716	0.491549	0.275451	0.236693	101884923		protein_coding
LOC101884926	64.0955	81.8461	46.3449	0.563084	-0.828579	0.0779724	0.263632	Down	0.777908	0.863765	1.38166	1.82463	0.726156	2.15446	101884926		protein_coding
LOC101884937	5.23842	7.21332	3.26352	0.46409	-1.10752	0.291616	0.559687	Down	0.0467607	0.018461	0.0379668	0.0271373	0.0901157	0.0653365	101884937		protein_coding
LOC101884938	74.2709	41.6851	106.857	2.54963	1.35029	0.00322201	0.0327283	Up	2.88236	2.82014	3.28151	1.76973	0.784917	0.525311	101884938		protein_coding
LOC101884942	7.15552	2.25112	12.0599	5.14205	2.36234	0.0873318	0.282113	Up	0.0450751	0.622844	1.14369	0.130795	0	0.179946	101884942		protein_coding
LOC101884945	1.35313	0.2978	2.40847	6.08112	2.60434	0.223888	0.486346	Up	0.0439599	0.173553	0.133848	0.0425198	0	0	101884945		protein_coding
LOC101884949	44.0649	22.7557	65.374	2.85276	1.51236	0.00245839	0.0268067	Up	0.228735	0.431452	0.44882	0.172077	0.0857131	0.0811683	101884949		protein_coding
LOC101884955	3.8852	3.01325	4.75715	1.54215	0.624947	0.65884	0.835298	Up	0.090478	0.0637866	0.0524733	0.012502	0	0.103201	101884955		protein_coding
LOC101884961	8.88179	11.1623	6.60125	0.581961	-0.781005	0.366429	0.627665	Down	0.140672	0.305453	0.171325	0.326552	0.101662	0.505425	101884961		protein_coding
LOC101884968	13.6575	11.1264	16.1887	1.45348	0.539515	0.405164	0.659797	Up	0.335547	0.636891	0.419145	0.374486	0.248714	0.206085	101884968		protein_coding
LOC101884973	94.6479	126.958	62.3376	0.491807	-1.02384	0.073229	0.254081	Down	0.41743	1.59806	0.590556	1.43149	1.79784	1.26246	101884973		protein_coding
LOC101884996	2.26414	0.976662	3.55162	3.45333	1.78799	0.281897	0.550053	Up	0.250348	0.141196	0.0362978	0.0345924	0	0.0713877	101884996		protein_coding
LOC101885004	25.3521	30.6824	20.0218	0.644228	-0.634358	0.370526	0.631199	Down	0.0892657	0.0973789	0.128744	0.25448	0.0282944	0.159425	101885004		protein_coding
LOC101885006	2.21932	0	4.43865	21.8663	4.45064	0.0930296	0.292868	Up	0.0576974	0	0.066924	0	0	0	101885006		protein_coding
LOC101885013	3.13819	4.78636	1.49002	0.318936	-1.64866	0.227731	0.490788	Down	0.0577609	0.0570097	0.0293114	0.139672	0.208715	0.0288238	101885013		protein_coding
LOC101885014	416.219	414.983	417.455	1.00429	0.00618017	0.983967	0.992742	Up	9.02843	7.59318	5.64632	9.0094	4.03967	6.3773	101885014	kynurenine 3-monooxygenase	protein_coding
LOC101885018	25.981	26.5103	25.4516	0.967502	-0.0476636	0.945913	0.976775	Down	0.447366	0.470984	1.63455	0.519253	0.898072	0.773913	101885018		protein_coding
LOC101885027	298.732	408.519	188.944	0.462172	-1.1135	2.9683e-05	0.000969456	Down	2.51597	3.91112	3.49513	7.17898	5.00023	6.37176	101885027		protein_coding
LOC101885037	3.33526	4.31565	2.35487	0.558501	-0.840369	0.640434	0.823903	Down	0.103119	0	0.0627949	0	0.149046	0.0823335	101885037		protein_coding
LOC101885062	74.2054	64.6938	83.717	1.29174	0.369317	0.23753	0.500475	Up	7.34526	6.45159	5.1295	4.75814	3.32785	4.50611	101885062		protein_coding
LOC101885065	421.746	623.124	220.367	0.354046	-1.49799	0.00310399	0.0317977	Down	2.00438	3.70933	3.49644	4.66503	11.4072	5.00111	101885065		protein_coding
LOC101885075	4.74703	2.26044	7.23363	3.25708	1.70358	0.163413	0.408045	Up	0.0507116	0.212721	0.0386013	0.0245251	0.0305405	0.025306	101885075		protein_coding
LOC101885083	3.10212	5.60946	0.59477	0.10715	-3.22229	0.0348908	0.161212	Down	0.018122	0.0178863	0	0.10517	0.109138	0.0723456	101885083		protein_coding
LOC101885096	29.1861	27.9219	30.4504	1.0746	0.103806	0.859418	0.937748	Up	0.949111	1.07059	0.743098	1.04916	0.228637	1.00138	101885096		protein_coding
LOC101885099	10.8062	5.46594	16.1465	2.82954	1.50057	0.0696378	0.246379	Up	0.34934	0.394053	0.607806	0.26549	0.0300552	0.124519	101885099		protein_coding
LOC101885160	3.36654	2.82737	3.9057	1.36647	0.45045	0.737656	0.877169	Up	0.0469123	0.123473	0.0317416	0.0151252	0.018835	0.0936405	101885160		protein_coding
LOC101885161	5.19975	5.90726	4.49225	0.766157	-0.384288	0.691521	0.853337	Down	0.0257654	0.033907	0.0697331	0.0581497	0.0517231	0.0342864	101885161		protein_coding
LOC101885164	993.783	782.94	1204.63	1.53909	0.622082	0.259133	0.525659	Up	42.6262	92.4742	77.9046	14.2738	40.6647	60.3437	101885164		protein_coding
LOC101885174	10.0269	9.65762	10.3961	1.07028	0.097985	0.944641	0.976481	Up	0.156257	0.0963903	0.0892062	0	0.011763	0.263166	101885174		protein_coding
LOC101885180	20.0264	25.0923	14.9606	0.600873	-0.734867	0.188682	0.442513	Down	0.276354	0.34095	0.537583	0.467776	0.58251	0.574607	101885180		protein_coding
LOC101885212	13.1896	17.6772	8.70203	0.490921	-1.02644	0.19785	0.454185	Down	0.0554371	0.118552	0.0937742	0.277042	0.144675	0.0553284	101885212		protein_coding
LOC101885216	2.48574	1.69715	3.27433	1.89	0.91839	0.628238	0.816052	Up	0.059988	0.0592078	0.0121766	0	0	0.0598702	101885216		protein_coding
LOC101885221	8.59611	7.02178	10.1704	1.45186	0.537907	0.604642	0.801519	Up	0.112819	0.125271	0.243319	0.0136404	0.0679444	0.197047	101885221		protein_coding
LOC101885235	76.4975	33.0792	119.916	3.59037	1.84413	1.15368e-05	0.000456964	Up	1.42136	2.65491	2.03202	0.576529	0.294539	0.61014	101885235		protein_coding
LOC101885237	4.71854	4.38667	5.05042	1.12863	0.174572	0.864999	0.939955	Up	0.0761613	0.0322161	0.077298	0.08419	0.0262099	0.0325765	101885237		protein_coding
LOC101885252	49.6194	28.8626	70.3763	2.46046	1.29893	0.123907	0.347044	Up	0.222758	1.48626	0.352689	0.0948027	0.364899	0.231214	101885252		protein_coding
LOC101885270	18.0098	16.9829	19.0368	1.12299	0.167342	0.847148	0.931825	Up	0.604741	0.514548	0.211643	0.08068	0.251172	0.665991	101885270		protein_coding
LOC101885278	485.327	710.784	259.87	0.366013	-1.45003	0.00071189	0.0111539	Down	1.48516	2.17468	2.39898	3.18999	6.51711	3.84131	101885278		protein_coding
LOC101885280	2.84269	0	5.68539	27.9884	4.80676	0.00838542	0.0627161	Up	0.0415472	0.0574096	0.0590341	0	0	0	101885280		protein_coding
LOC101885283	58.2539	81.771	34.7369	0.423692	-1.23891	0.0331019	0.155745	Down	1.8721	1.37798	0.450856	4.05121	1.52875	2.12177	101885283		protein_coding
LOC101885301	5.16248	4.64577	5.6792	1.24589	0.317181	0.766673	0.891	Up	0.0432559	0.0569244	0.0365845	0.00697314	0.0347339	0.0503662	101885301		protein_coding
LOC101885341	3.09346	2.32142	3.8655	1.61787	0.694092	0.590269	0.791576	Up	0.0329753	0.027122	0.0111558	0.0265792	0.00661968	0.0054851	101885341		protein_coding
LOC101885345	3.0271	1.82843	4.22577	2.18629	1.12848	0.471657	0.713495	Up	0.0220374	0.174006	0.111831	0.106577	0	0.0219941	101885345		protein_coding			dre04210	Apoptosis
LOC101885363	19.8131	22.0619	17.5643	0.783388	-0.352201	0.552522	0.766568	Down	0.282881	0.206367	0.237172	0.404473	0.103699	0.306876	101885363		protein_coding
LOC101885376	128.062	144.725	111.398	0.771963	-0.373397	0.143238	0.378092	Down	5.16001	3.92881	4.71332	5.24052	4.75014	5.22346	101885376		protein_coding
LOC101885386	178.585	121.16	236.01	1.93882	0.955175	0.0208338	0.115089	Up	8.05173	7.84642	4.24111	4.26366	1.50383	3.40764	101885386		protein_coding			dre04150	mTOR signaling pathway
LOC101885400	1.83657	1.27446	2.39867	1.7788	0.830907	0.60409	0.80115	Up	0.0390755	0.0771346	0.0396587	0.0377954	0	0.0389988	101885400		protein_coding
LOC101885436	324.519	459.734	189.303	0.412426	-1.27779	0.00681497	0.0548083	Down	3.16173	4.91603	5.62659	6.28388	13.8505	6.91622	101885436		protein_coding
LOC101885444	13.0527	10.0378	16.0677	1.60049	0.678516	0.406508	0.660883	Up	0.0753879	0.0206687	0.131772	0.0526632	0.0353124	0.03344	101885444		protein_coding
LOC101885445	350.419	314.506	386.332	1.22524	0.293062	0.465316	0.708562	Up	4.41625	4.5179	4.98381	5.71622	1.48837	2.97056	101885445		protein_coding
LOC101885450	5.19206	5.67337	4.71075	0.845048	-0.242895	0.863821	0.939573	Down	0.295444	0.0795278	0.0545188	0	0.194104	0.214447	101885450		protein_coding
LOC101885455	4.08837	4.57254	3.6042	0.764796	-0.386853	0.731663	0.87345	Down	0.0277642	0.0685077	0.0704463	0.107418	0.0167207	0.0692742	101885455		protein_coding
LOC101885464	7.50236	6.09241	8.91231	1.5294	0.612965	0.559729	0.772042	Up	0.258478	0.13737	0.201797	0.0192316	0.215537	0.0793757	101885464		protein_coding
LOC101885470	6.54528	5.71208	7.37849	1.29229	0.36993	0.730732	0.87294	Up	0.286981	0.020232	0.208045	0.158617	0.0987607	0.0818336	101885470		protein_coding
LOC101885477	3.48861	6.97723	0	0.0233621	-5.41969	0.00288881	0.0300442	Down	0	0	0	0.950284	0.215157	0.713121	101885477		protein_coding	GO:0016020,GO:0035036	membrane|sperm-egg recognition
LOC101885478	4.76015	7.72	1.8003	0.230994	-2.11407	0.0704081	0.248204	Down	0.0084742	0.016728	0.025802	0.0409829	0.030621	0.118406	101885478		protein_coding			dre00534	Glycosaminoglycan biosynthesis - heparan sulfate / heparin
LOC101885494	2.42459	1.57226	3.27692	1.96181	0.972182	0.493764	0.72932	Up	0.0651133	0.0481998	0.066085	0.0472351	0	0.0324927	101885494		protein_coding
LOC101885506	90.8414	51.4459	130.237	2.52616	1.33694	0.411593	0.66566	Up	1.14391	2.32079	3.4507	2.0592	0	0.53912	101885506		protein_coding
LOC101885512	74.5749	69.3127	79.8372	1.15294	0.205319	0.593781	0.793772	Up	2.10834	2.6833	2.61845	2.57592	1.77094	1.19054	101885512	apoptosis facilitator Bcl-2-like protein 14	protein_coding
LOC101885539	14.7316	13.5949	15.8682	1.17229	0.229329	0.729267	0.8721	Up	0.155647	0.19552	0.402105	0.164234	0.170431	0.211829	101885539		protein_coding
LOC101885582	17.7677	19.2374	16.298	0.840876	-0.250035	0.76731	0.891	Down	0.0479466	0.263657	0.0556138	0.159003	0.0660008	0.164066	101885582		protein_coding
LOC101885586	2.42962	2.79506	2.06418	0.75849	-0.398797	0.801261	0.907746	Down	0.0659077	0	0.0501685	0.0159371	0.0595384	0.0493338	101885586		protein_coding
LOC101885593	1.33508	2.67016	0	0.0620076	-4.01141	0.184034	0.435884	Down	0	0	0	0.207664	0.193949	0	101885593		protein_coding
LOC101885604	145.997	206.315	85.6793	0.416455	-1.26377	0.0132996	0.0851887	Down	0.734677	1.17135	1.33068	1.11511	3.04951	2.17714	101885604		protein_coding
LOC101885606	94.6579	76.1378	113.178	1.4755	0.561201	0.292367	0.560379	Up	3.28169	2.30692	3.40255	3.47104	0.625611	1.39021	101885606		protein_coding
LOC101885607	4.08698	2.03659	6.13738	2.96539	1.56822	0.413745	0.667925	Up	0.381483	0.0209179	0.0430196	0	0	0.126911	101885607		protein_coding
LOC101885612	1566.45	1675.66	1457.23	0.870137	-0.200686	0.295515	0.563775	Down	56.6007	54.7798	56.4694	60.3607	54.2748	49.257	101885612		protein_coding
LOC101885620	1.87455	1.65552	2.09357	1.23643	0.306179	0.884775	0.949163	Up	0.0049143	0	0.0299258	0.00475331	0	0.0196186	101885620		protein_coding
LOC101885626	26.9015	17.1472	36.6559	2.10659	1.07491	0.132378	0.360772	Up	1.51331	1.06688	1.86502	0.522762	0.130197	1.1867	101885626		protein_coding
LOC101885651	44.8694	57.7732	31.9657	0.555511	-0.848111	0.035642	0.163101	Down	0.466315	0.460251	0.741464	0.932147	0.861223	0.760154	101885651		protein_coding
LOC101885675	51.2117	36.6492	65.7742	1.78659	0.837211	0.186455	0.43924	Up	1.40038	0.991552	4.35652	1.59006	0.69669	1.00265	101885675		protein_coding
LOC101885678	30.4957	27.5908	33.4006	1.23266	0.301776	0.654238	0.83201	Up	0.498224	0.427041	0.54558	0.253633	0.584309	0.130854	101885678		protein_coding
LOC101885684	3.88659	4.79932	2.97385	0.63021	-0.666094	0.649054	0.8292	Down	0.0689286	0.0680321	0	0.0133341	0.0830231	0.082552	101885684		protein_coding
LOC101885690	77.3257	91.7365	62.9149	0.685222	-0.545356	0.0726988	0.253056	Down	0.92529	0.901548	0.674225	1.20478	0.857303	1.07739	101885690		protein_coding			dre04512	ECM-receptor interaction
LOC101885706	495.435	735.27	255.601	0.347859	-1.52342	0.00167649	0.0205114	Down	5.66622	9.46652	10.0639	9.5625	25.5576	24.3876	101885706		protein_coding
LOC101885707	8.97297	11.9431	6.00288	0.501564	-0.995495	0.222802	0.48486	Down	0.0592562	0.131592	0.105246	0.11463	0.124903	0.26613	101885707		protein_coding
LOC101885714	3.50962	3.45164	3.56761	1.02037	0.0290981	0.979264	0.990143	Up	0.0501206	0.0296812	0.0406949	0.0581744	0.0241477	0.0200089	101885714		protein_coding
LOC101885715	45.9094	41.0956	50.7232	1.22047	0.287433	0.641411	0.824429	Up	0.423846	0.380303	0.508384	0.491953	0.0649744	0.407632	101885715		protein_coding
LOC101885734	8.21049	6.57681	9.84416	1.47208	0.557857	0.457658	0.703452	Up	0.169577	0.152156	0.187754	0.119288	0.0557051	0.123087	101885734		protein_coding
LOC101885757	1.0174	0	2.03479	10.0309	3.32637	0.399194	0.655286	Up	0.118223	0	0	0	0	0	101885757		protein_coding
LOC101885790	17.9922	28.2224	7.76196	0.278382	-1.84486	0.0116137	0.0772049	Down	0.0631895	0.0445483	0.128265	0.165895	0.347933	0.180187	101885790		protein_coding			dre04510,dre04810,dre04270	Focal adhesion|Regulation of actin cytoskeleton|Vascular smooth muscle contraction
LOC101885796	5.12176	6.63414	3.60938	0.542947	-0.881117	0.633193	0.818551	Down	0	0.0419146	0.474108	0.57506	0.255753	0	101885796		protein_coding
LOC101885815	4.24745	5.26437	3.23053	0.605775	-0.723146	0.633366	0.818551	Down	0.591006	0.072915	0.149957	0.285822	0	0.88477	101885815		protein_coding
LOC101885828	11.3158	7.36687	15.2647	2.15428	1.10721	0.17496	0.423954	Up	0.0835674	0.109974	0.162561	0.0202074	0.0754914	0.0417017	101885828		protein_coding
LOC101885829	6.00846	6.07744	5.93948	0.973875	-0.0381916	0.977579	0.989544	Down	0.0326827	0.0179209	0.0221136	0	0.00874792	0.0543643	101885829		protein_coding
LOC101885830	140.984	167.645	114.323	0.684257	-0.547389	0.131443	0.358892	Down	2.57242	1.47748	1.54879	1.88368	2.45074	2.50935	101885830		protein_coding
LOC101885831	6.37292	0	12.7458	62.7974	5.97263	0.000201564	0.00443831	Up	0.301323	0.181028	0.079779	0	0	0	101885831		protein_coding
LOC101885844	5.71553	4.50152	6.92955	1.57296	0.653481	0.633023	0.818551	Up	0.0761675	0.300707	0.0579781	0	0.114678	0.114027	101885844		protein_coding
LOC101885860	40.5443	56.1622	24.9263	0.446988	-1.16169	0.1084	0.320922	Down	0.411388	1.00156	0.86289	0.477493	2.31237	1.31386	101885860		protein_coding
LOC101885863	3.29342	0	6.58683	32.4249	5.01903	0.00469091	0.0424671	Up	0.101936	0.140854	0.206915	0	0	0	101885863		protein_coding
LOC101885865	9.58206	9.01947	10.1446	1.12723	0.172778	0.812167	0.913135	Up	0.159731	0.143321	0.19159	0.182588	0.122431	0.0724623	101885865		protein_coding
LOC101885869	217.296	3.33971	431.253	121.243	6.92175	4.2218e-35	6.17529e-32	Up	11.664	17.3264	13.2063	0.141733	0.0352992	0.116996	101885869		protein_coding
LOC101885873	5.48589	5.05549	5.91628	1.20157	0.264919	0.787704	0.901201	Up	0.152515	0.0547386	0.0703595	0.0402323	0.0835005	0.0691889	101885873		protein_coding
LOC101885875	37.1032	44.7715	29.435	0.662821	-0.593309	0.545434	0.761925	Down	1.8197	1.56675	0.432243	0.786421	3.45091	0.231846	101885875		protein_coding
LOC101885876	2.53484	0.637231	4.43245	6.41015	2.68036	0.118246	0.338085	Up	0.104645	0.0129106	0.0796554	0.0126522	0	0.013055	101885876		protein_coding
LOC101885881	102.989	85.3718	120.606	1.41093	0.49665	0.402165	0.657738	Up	5.98587	1.83507	1.44977	2.96068	1.39281	1.33513	101885881		protein_coding
LOC101885891	3.88	3.56722	4.19278	1.13867	0.187346	0.885134	0.949192	Up	0.0992248	0.171385	0.0755292	0.0959742	0	0.173303	101885891		protein_coding
LOC101885896	8.90225	12.9427	4.86176	0.373087	-1.42242	0.321931	0.58846	Down	0	0.456051	0.0312638	0.297949	0.111309	0.76859	101885896		protein_coding
LOC101885900	742.306	989.824	494.787	0.500253	-0.99927	0.0293456	0.144257	Down	11.7561	19.474	13.9897	14.7638	36.4398	22.5362	101885900		protein_coding
LOC101885916	22.0386	34.5288	9.5483	0.276799	-1.85309	0.00120086	0.0161572	Down	0.181349	0.208823	0.092028	0.438521	0.418661	0.633478	101885916		protein_coding
LOC101885920	15.9346	19.0207	12.8484	0.665731	-0.58699	0.52283	0.747932	Down	0.101822	0.129211	0.0811969	0.25325	0.00876017	0.166951	101885920		protein_coding
LOC101885921	11.9151	7.85127	15.9789	2.00048	1.00035	0.190513	0.444797	Up	0.682505	0.291906	0.253986	0.220049	0.0822063	0.227055	101885921		protein_coding
LOC101885938	26.545	33.3827	19.7074	0.588457	-0.764992	0.109958	0.324174	Down	0.597314	0.717708	0.395366	1.05501	0.656892	0.803496	101885938		protein_coding
LOC101885950	35.6452	40.0649	31.2255	0.778256	-0.361683	0.717601	0.866919	Down	0.0176714	0.715105	0.170384	0.538414	0.276703	0.220459	101885950		protein_coding
LOC101885977	9.58639	5.45591	13.7169	2.52727	1.33758	0.0652056	0.237215	Up	0.482709	0.476431	0.345821	0.164787	0.136803	0.141695	101885977		protein_coding
LOC101885979	29.0913	12.6197	45.5629	3.53016	1.81974	0.0397926	0.173886	Up	1.09127	1.00976	0.501862	0.379328	0	0.2893	101885979		protein_coding
LOC101885990	5.56183	6.91332	4.21034	0.600588	-0.735552	0.647728	0.828265	Down	0	0.0175195	0.234199	0.291871	0.02138	0.0708622	101885990		protein_coding
LOC101885996	81.3844	93.1713	69.5975	0.747295	-0.42025	0.359819	0.62149	Down	1.34024	1.09604	0.544096	0.925951	0.907077	1.56691	101885996		protein_coding
LOC101886000	57.1281	67.1574	47.0989	0.697245	-0.520262	0.16179	0.405723	Down	0.827621	0.746439	0.680667	1.02134	0.567175	1.21051	101886000		protein_coding
LOC101886015	102.003	123.261	80.7448	0.658552	-0.60263	0.100265	0.306452	Down	1.8798	2.39959	2.49293	2.27883	3.38118	2.95175	101886015		protein_coding			dre04510,dre04810	Focal adhesion|Regulation of actin cytoskeleton
LOC101886021	25.5376	23.2301	27.8451	1.18659	0.246827	0.685475	0.850273	Up	0.207593	0.258813	0.554451	0.391017	0.144761	0.21809	101886021		protein_coding
LOC101886030	2.16867	3.43229	0.905048	0.265627	-1.91253	0.235961	0.499338	Down	0	0.0133342	0.027423	0.0261346	0.0488172	0.0539335	101886030		protein_coding
LOC101886044	2.84516	1.82843	3.86189	1.98671	0.990385	0.493413	0.729013	Up	0.0266606	0.0175426	0.0135293	0.0214893	0	0.00443472	101886044		protein_coding
LOC101886047	67.4969	73.1206	61.8732	0.840923	-0.249954	0.613112	0.807779	Down	0.66425	0.921656	0.40059	1.00564	0.324668	0.768634	101886047		protein_coding
LOC101886073	619.808	899.389	340.226	0.378671	-1.40098	5.15189e-05	0.00151363	Down	7.25192	9.03429	8.88603	14.1784	23.4881	17.366	101886073		protein_coding
LOC101886086	8.49581	5.49461	11.497	2.05341	1.03803	0.415828	0.669655	Up	0.0154892	0.152877	0.0262006	0.0699148	0.0124376	0.00515292	101886086		protein_coding
LOC101886098	489.069	461.73	516.408	1.12034	0.163935	0.679005	0.846659	Up	8.68632	5.91141	6.51024	5.39357	7.03841	3.14034	101886098		protein_coding
LOC101886104	84.0897	126.659	41.5201	0.328698	-1.60517	0.000165292	0.00378618	Down	0.747826	0.953379	0.458554	1.46172	1.95161	2.13023	101886104		protein_coding
LOC101886116	71.2599	90.3063	52.2135	0.580204	-0.785369	0.386196	0.644159	Down	0.374993	0.280509	0.0360559	0.0725417	0.561024	0.307285	101886116		protein_coding
LOC101886133	5.57987	9.33882	1.82091	0.197212	-2.34218	0.0982248	0.302433	Down	0	0.0963625	0.0198179	0.0566603	0.30575	0.116929	101886133		protein_coding	GO:0004197,GO:0006508,GO:0008234	cysteine-type endopeptidase activity|proteolysis|cysteine-type peptidase activity
LOC101886147	31.7755	25.9118	37.6392	1.46111	0.547066	0.396858	0.653236	Up	0.211385	0.894154	0.781538	0.365107	0.418286	0.316455	101886147		protein_coding
LOC101886164	4.39412	4.87893	3.9093	0.829853	-0.269072	0.847762	0.931825	Down	0.12072	0.357449	0.0408404	0.0778432	0.387745	0.0401609	101886164		protein_coding
LOC101886167	22.1373	21.9485	22.3261	1.02219	0.031667	0.949432	0.978483	Up	0.151527	0.125434	0.0892966	0.0992847	0.0941994	0.112203	101886167		protein_coding
LOC101886187	2.6663	3.5349	1.79771	0.505438	-0.984393	0.498028	0.732392	Down	0.0522215	0.103085	0	0.101022	0.0628998	0.104238	101886187		protein_coding
LOC101886205	3.61705	4.80864	2.42547	0.513205	-0.962393	0.599212	0.797833	Down	0	0.0895757	0.0307035	0	0.127533	0.0603853	101886205		protein_coding
LOC101886216	25.0117	17.1693	32.8542	1.8682	0.901652	0.115245	0.332654	Up	0.803839	0.906725	0.815835	0.666433	0.138315	0.38967	101886216		protein_coding
LOC101886224	35.721	51.6572	19.7847	0.385034	-1.37694	0.00893597	0.064973	Down	0.0165184	0.0291135	0.0323323	0.0388019	0.0639516	0.0671215	101886224		protein_coding
LOC101886227	4.42918	6.51948	2.33888	0.357587	-1.48363	0.369216	0.629999	Down	0.522851	0.0737216	0	0.144492	0.0899662	1.19274	101886227		protein_coding
LOC101886239	3.20698	2.31138	4.10258	1.88242	0.91259	0.593731	0.793772	Up	0.157228	0.0141076	0.0290136	0	0.0688649	0.0142654	101886239		protein_coding
LOC101886255	11329.1	8113.38	14544.8	1.79254	0.842009	0.0162681	0.0975686	Up	390.233	449.949	259.547	276.53	104.971	162.788	101886255		protein_coding			dre00250,dre00220	Alanine, aspartate and glutamate metabolism|Arginine biosynthesis
LOC101886256	4.94643	3.8714	6.02145	1.51779	0.601976	0.741278	0.878974	Up	0.00489151	0.0289674	0.0645387	0.0615065	0	0	101886256		protein_coding
LOC101886260	2832.71	2625.62	3039.79	1.15739	0.210873	0.314983	0.581777	Up	28.9774	33.6538	27.3187	27.0188	16.2638	24.2343	101886260		protein_coding
LOC101886266	7.57991	5.60015	9.55967	1.68606	0.753656	0.341799	0.607425	Up	0.105394	0.104023	0.166393	0.0792877	0.042315	0.0701248	101886266		protein_coding
LOC101886275	25.7919	25.756	25.8278	0.996018	-0.0057561	0.992107	0.996663	Down	0.172368	0.419646	0.396533	0.444591	0.207614	0.217905	101886275		protein_coding
LOC101886280	3.0671	2.51661	3.6176	1.43674	0.522803	0.692501	0.853919	Up	0.0464391	0.275011	0.235661	0.179671	0.11187	0.046348	101886280		protein_coding			dre04261	Adrenergic signaling in cardiomyocytes
LOC101886291	33.7065	44.4787	22.9343	0.512962	-0.963077	0.266189	0.533107	Down	0.0326669	0.306299	0.281812	0.750422	0.167223	0.187466	101886291		protein_coding
LOC101886356	7.62231	4.54023	10.7044	2.33949	1.22619	0.214142	0.474471	Up	0.233083	0.0707852	0.345744	0.138737	0.0647871	0.0357886	101886356		protein_coding			dre04330	Notch signaling pathway
LOC101886358	2.39761	1.7868	3.00842	1.63585	0.710037	0.771875	0.893272	Up	0	0.00871395	0.0806448	0.0512373	0	0	101886358		protein_coding
LOC101886363	6.30389	4.03154	8.57625	2.08953	1.06318	0.442864	0.692447	Up	0.157029	0.0729349	0.0374994	0.0089344	0	0.101408	101886363		protein_coding
LOC101886383	922.629	893.189	952.069	1.0656	0.0916695	0.635269	0.820138	Up	7.26515	5.33035	6.72441	6.0291	4.17913	5.35988	101886383		protein_coding			dre05132	Salmonella infection
LOC101886386	33.0389	28.6071	37.4706	1.29181	0.369392	0.550151	0.764833	Up	0.111292	0.0863065	0.0524424	0.0922681	0.0167561	0.0634706	101886386		protein_coding
LOC101886393	698.48	787.649	609.311	0.773596	-0.370347	0.0341607	0.158735	Down	2.17275	2.19398	2.46301	2.72235	2.13389	2.70894	101886393		protein_coding			dre04010	MAPK signaling pathway
LOC101886404	4.90802	3.68846	6.12758	1.6749	0.744073	0.594227	0.794065	Up	0.242703	0.0126077	0.0129645	0.0494214	0.0461575	0.0382463	101886404		protein_coding
LOC101886419	7.20256	7.85127	6.55384	0.820221	-0.285915	0.724262	0.868974	Down	0.248473	0.183931	0.252181	0.300416	0.11223	0.309981	101886419		protein_coding
LOC101886422	1.20721	0.339431	2.07499	5.24959	2.39221	0.360674	0.622344	Up	0.024478	0.0181197	0	0	0	0.00610748	101886422		protein_coding
LOC101886427	9.287	8.6134	9.9606	1.14556	0.196047	0.859579	0.937748	Up	0.0468906	0.24066	0.0190362	0.0725671	0.0338873	0.131036	101886427		protein_coding
LOC101886429	164.976	276.904	53.0483	0.19164	-2.38353	2.86257e-05	0.00094083	Down	0.387803	0.147215	0.802319	2.66897	1.94925	1.30999	101886429		protein_coding			dre00340	Histidine metabolism
LOC101886442	3.2296	0.893401	5.5658	5.77746	2.53044	0.177537	0.427662	Up	0.0724179	0.00476507	0.0146997	0.0140091	0	0	101886442		protein_coding
LOC101886447	672.566	751.296	593.836	0.790977	-0.338292	0.439209	0.689469	Down	10.9697	4.38166	4.54588	5.42496	8.06849	7.26909	101886447		protein_coding			dre00565	Ether lipid metabolism
LOC101886478	8.78685	16.0641	1.50961	0.0948551	-3.39813	0.0305504	0.147934	Down	0	0.0355816	0.0548827	0.0348694	0.65133	0.0359797	101886478		protein_coding
LOC101886482	8.7135	5.27076	12.1562	2.21664	1.14837	0.271166	0.538492	Up	0.130756	0.058075	0.0796245	0.0758835	0	0.0326249	101886482		protein_coding
LOC101886500	10.1716	12.2343	8.10883	0.659453	-0.600658	0.510842	0.741076	Down	0.0321638	0.0740727	0.184981	0.217771	0.103308	0.0642013	101886500		protein_coding
LOC101886501	16.0177	5.91585	26.1195	4.59176	2.19905	0.124395	0.347715	Up	0.350391	0.813728	0.627566	0	0.29791	0	101886501		protein_coding
LOC101886504	5.18629	5.03249	5.34009	1.08743	0.120924	0.946287	0.976816	Up	0.0343301	0	0.0547525	0.00948728	0.0531642	0	101886504		protein_coding
LOC101886535	64.0066	75.0914	52.9219	0.70192	-0.510621	0.329636	0.595947	Down	1.33726	0.759376	1.1713	2.51603	0.860512	0.731307	101886535		protein_coding
LOC101886537	24.4969	23.9606	25.0331	1.03701	0.0524269	0.954038	0.979986	Up	0.0953707	1.06681	1.48417	1.2607	0.306326	0.72974	101886537		protein_coding
LOC101886546	191.122	185.159	197.084	1.06506	0.0909317	0.722602	0.868604	Up	1.81338	1.76797	1.28681	1.41886	1.13648	1.36104	101886546		protein_coding
LOC101886558	7.71977	8.57542	6.86412	0.788924	-0.342042	0.777296	0.896126	Down	0.0325925	0.0275731	0.0472557	0.0270213	0	0.0929388	101886558		protein_coding
LOC101886560	4.14472	2.86535	5.42409	1.95704	0.968672	0.511227	0.74154	Up	0.0124031	0.0856925	0.125882	0.0359903	0.0597571	0	101886560		protein_coding
LOC101886572	2.09701	0.637231	3.55679	5.19497	2.37712	0.241588	0.504674	Up	0.0684257	0	0.0972256	0.0132368	0	0.0136583	101886572		protein_coding
LOC101886601	4.13315	4.95999	3.30631	0.653834	-0.613003	0.708394	0.8626	Down	0.00920426	0.0272537	0.0653914	0.133541	0.0110863	0	101886601		protein_coding
LOC101886608	24.311	12.1419	36.4801	2.99227	1.58124	0.0477989	0.195209	Up	0.78675	0.299709	0.616379	0.0534018	0.0831249	0.344389	101886608		protein_coding
LOC101886609	1.92881	3.55353	0.304085	0.0921049	-3.44058	0.161177	0.404831	Down	0	0.0283111	0	0.0554889	0.207297	0	101886609		protein_coding
LOC101886616	4.64362	4.85738	4.42986	0.898739	-0.154026	0.91433	0.96304	Down	0.0419278	0.0137942	0.0141845	0.0585784	0.0112225	0	101886616		protein_coding
LOC101886642	1.55284	1.01829	2.08738	1.9956	0.996821	0.630875	0.817757	Up	0.00964469	0.00475963	0.0195773	0	0	0.0144386	101886642		protein_coding
LOC101886645	5.84899	7.49742	4.20055	0.570866	-0.808776	0.640195	0.823862	Down	0.0106873	0.0105483	0.130162	0.0206744	0.180217	0	101886645		protein_coding
LOC101886660	43.2458	50.0554	36.4362	0.736161	-0.441907	0.326223	0.592812	Down	0.783778	0.908962	0.696041	0.796006	1.18006	0.743128	101886660		protein_coding
LOC101886665	28.2351	18.5047	37.9656	2.01301	1.00936	0.145494	0.381953	Up	0.967281	0.923904	2.09011	1.05631	0.150332	0.560545	101886665		protein_coding			dre04060	Cytokine-cytokine receptor interaction
LOC101886687	24.5492	39.3497	9.74879	0.249488	-2.00296	0.00562466	0.0482134	Down	0.21035	0.0830458	0.0533724	0.203459	0.430717	0.514347	101886687		protein_coding
LOC101886695	44.9318	52.3934	37.4702	0.719947	-0.474037	0.572902	0.780357	Down	0.183127	0.310881	0.42376	0.0495957	0.60878	0.350913	101886695		protein_coding
LOC101886700	1.8967	2.88836	0.905048	0.305531	-1.71061	0.382216	0.640663	Down	0	0.0045628	0.00938384	0.0178859	0	0.0230693	101886700		protein_coding
LOC101886712	223.944	294.419	153.469	0.520983	-0.940691	0.000612447	0.0100014	Down	1.15348	1.61743	1.30795	2.88542	1.9355	1.94516	101886712		protein_coding
LOC101886719	1.81848	0.339431	3.29753	8.33136	3.05855	0.118735	0.338736	Up	0.0652601	0.128823	0.044156	0	0	0.0217107	101886719		protein_coding
LOC101886743	203.264	273.989	132.539	0.482731	-1.05071	0.0510495	0.203225	Down	1.09728	0.658739	0.769228	3.02535	0.497324	1.21932	101886743		protein_coding
LOC101886755	1.34417	0	2.68834	13.2371	3.72651	0.128371	0.354046	Up	0.0160998	0.00794519	0.0490201	0	0	0	101886755		protein_coding
LOC101886778	31.9394	22.4565	41.4223	1.81796	0.862321	0.31944	0.586637	Up	0.538027	1.17269	1.3879	1.19259	0.0540036	0.335607	101886778		protein_coding
LOC101886779	3.8685	2.0846	5.6524	2.57299	1.36345	0.388303	0.64611	Up	0.120147	0.0889381	0.0762124	0.101684	0	0	101886779		protein_coding
LOC101886796	4.52132	4.2417	4.80095	1.18104	0.240056	0.875841	0.945066	Up	0.15005	0.333221	0.114217	0.0362836	0.361464	0	101886796		protein_coding
LOC101886821	2.87963	1.61389	4.14537	2.44607	1.29046	0.362125	0.623452	Up	0.0861884	0.024305	0.0624819	0.0238185	0	0.0368654	101886821		protein_coding
LOC101886833	87.533	61.8286	113.237	1.82958	0.871514	0.0329596	0.155339	Up	3.67277	2.5375	4.55912	1.36633	1.22505	2.42491	101886833		protein_coding
LOC101886834	13.94	14.7078	13.1721	0.911496	-0.133692	0.88409	0.948982	Down	0.175535	0.274316	0.193001	0.198082	0.352381	0.0291984	101886834		protein_coding
LOC101886838	9.1796	4.89901	13.4602	2.67156	1.41768	0.151615	0.391621	Up	0.166487	0.246483	0.120694	0.138028	0.0286472	0.0118686	101886838		protein_coding
LOC101886861	14.615	9.02878	20.2012	2.25804	1.17507	0.21924	0.480275	Up	0.0670531	0.496358	0.561444	0.194569	0.181719	0.0501911	101886861		protein_coding
LOC101886864	4.67442	4.58551	4.76334	1.01348	0.0193154	0.987667	0.994577	Up	0.128451	0.0845203	0.130368	0.0828287	0	0.213665	101886864		protein_coding
LOC101886880	112.03	98.2965	125.764	1.27575	0.351346	0.619223	0.811029	Up	0.536414	1.02646	3.05541	1.27063	0.329643	1.61701	101886880		protein_coding
LOC101886882	31.7075	33.5456	29.8695	0.892059	-0.164789	0.76286	0.888696	Down	0.237111	0.0903262	0.0928822	0.164966	0.120251	0.116247	101886882		protein_coding
LOC101886884	47.5389	29.3426	65.7352	2.20765	1.14251	0.00806527	0.0608551	Up	1.41278	1.68149	1.47603	0.964585	0.350342	0.497649	101886884		protein_coding
LOC101886901	4.67594	4.57254	4.77933	1.01493	0.0213801	0.984391	0.992876	Up	0.0536531	0.0397165	0.122521	0.103791	0.016156	0.0669348	101886901		protein_coding
LOC101886910	2138.43	2441.16	1835.7	0.752146	-0.410915	0.296466	0.564762	Down	133.724	164.198	107.489	184.045	186.135	83.611	101886910		protein_coding
LOC101886929	42.7677	54.6345	30.9009	0.56301	-0.828766	0.0703923	0.248191	Down	0.791135	0.363184	0.765596	1.2635	0.620497	1.06502	101886929		protein_coding
LOC101886963	42.5326	42.1086	42.9566	1.01405	0.0201277	0.971839	0.98659	Up	1.29581	0.535781	0.710894	1.30418	0.442925	0.454393	101886963		protein_coding
LOC101886966	11.834	4.31565	19.3523	4.76602	2.25278	0.0227478	0.122105	Up	0.282885	0.225512	0.198766	0	0.0786298	0.0434354	101886966		protein_coding
LOC101886973	5.9999	3.27873	8.72106	2.66183	1.41242	0.261773	0.528593	Up	0.396524	1.1741	0.0574917	0.109581	0.136459	0.282676	101886973		protein_coding
LOC101886975	37.8738	41.6271	34.1205	0.813965	-0.296962	0.733291	0.874415	Down	0.266388	0.456657	0.0711484	0.637373	0.0591057	0.209894	101886975		protein_coding
LOC101887000	8.18715	10.3642	6.01008	0.578903	-0.788605	0.386349	0.644271	Down	0.0138707	0.0376483	0.0175971	0.0570192	0.0334139	0.0138435	101887000		protein_coding
LOC101887003	79.6429	52.2462	107.04	2.02964	1.02122	0.0122259	0.0800268	Up	5.52661	3.1541	4.88411	2.94551	1.08681	1.80107	101887003		protein_coding
LOC101887017	183.941	221.45	146.432	0.662428	-0.594165	0.295211	0.563457	Down	0.391143	0.739021	1.61061	0.880967	1.56817	0.953631	101887017		protein_coding
LOC101887027	9.80613	10.4289	9.1834	0.866456	-0.206802	0.790156	0.902393	Down	0.343844	0.148475	0.174488	0.353366	0.103538	0.214481	101887027		protein_coding
LOC101887036	31.0595	32.3458	29.7732	0.912397	-0.132267	0.761257	0.88796	Down	0.491543	0.344712	0.459493	0.550509	0.264866	0.413118	101887036		protein_coding
LOC101887081	33.1884	40.2203	26.1566	0.64663	-0.628988	0.265625	0.532342	Down	0.653887	0.40761	0.454073	0.582534	0.310892	1.13347	101887081		protein_coding
LOC101887104	6.44834	4.52453	8.37216	1.82598	0.868672	0.454061	0.701142	Up	0.201894	0.287832	0.136605	0.0216978	0.0270197	0.246276	101887104		protein_coding
LOC101887118	12.6577	15.043	10.2725	0.674893	-0.567268	0.542239	0.759839	Down	0.0166066	0.172102	0.0926994	0.192751	0.0500058	0.132592	101887118		protein_coding
LOC101887122	30.134	33.344	26.924	0.807978	-0.307612	0.532196	0.753895	Down	0.471478	0.714639	0.324707	0.553754	0.466478	0.588192	101887122		protein_coding
LOC101887148	11.2837	10.6534	11.914	1.09393	0.129522	0.895798	0.952983	Up	0.18967	0.187203	0.0679413	0.269789	0.0134384	0.0890812	101887148		protein_coding
LOC101887156	12.4032	13.6682	11.1383	0.823754	-0.279714	0.748905	0.882703	Down	0.0920342	0.33307	0.140112	0.0741827	0.240182	0.260252	101887156		protein_coding
LOC101887157	9.52665	12.2882	6.76514	0.558413	-0.840597	0.355072	0.618232	Down	0.218696	0.0404722	0.05549	0.132207	0.197561	0.136417	101887157		protein_coding
LOC103908612	118.324	117.698	118.95	1.01545	0.0221206	0.956658	0.980432	Up	1.78248	3.13538	2.07776	1.86065	2.40205	1.53239	103908612		protein_coding
LOC103908620	8599.8	13760.2	3439.38	0.249959	-2.00024	3.13841e-05	0.0010169	Down	175.86	208.247	406.177	463.664	1080.05	1051.17	103908620		protein_coding
LOC103908633	4.02395	4.16282	3.88509	0.90337	-0.146611	0.906121	0.958712	Down	0.0507306	0.0625885	0.0514877	0.073603	0	0.0886044	103908633		protein_coding
LOC103908642	460.131	664.382	255.88	0.385192	-1.37635	0.00420479	0.0395343	Down	4.79283	3.07482	4.27777	4.32221	6.8765	15.3492	103908642		protein_coding
LOC103908668	32.4067	20.0699	44.7435	2.19683	1.13542	0.0134603	0.085738	Up	0.399879	0.338296	0.488673	0.189443	0.0884657	0.20362	103908668		protein_coding
LOC103908669	632.812	839.243	426.381	0.508525	-0.975609	0.00677784	0.0546229	Down	3.37305	2.7225	4.92063	4.78606	7.29263	5.85099	103908669		protein_coding
LOC103908672	1.76772	0.5956	2.93984	4.44499	2.15218	0.295587	0.563807	Up	0.158823	0.0223939	0.0460552	0.0438914	0	0	103908672		protein_coding
LOC103908683	1.83183	0.637231	3.02644	4.41515	2.14246	0.303287	0.571161	Up	0	0.0422245	0.0289462	0.00689656	0	0.00711615	103908683		protein_coding
LOC103908723	1918.6	2269.38	1567.82	0.690935	-0.533377	0.168641	0.414869	Down	44.7533	48.378	103.706	69.2522	78.3122	92.5399	103908723		protein_coding
LOC103908802	6.78904	7.63601	5.94207	0.793244	-0.334164	0.761541	0.887988	Down	0.0370494	0.0137128	0.0423026	0.00447945	0.0446252	0.0462208	103908802		protein_coding
LOC103908853	6.95491	4.65581	9.25401	1.92441	0.944415	0.297447	0.565618	Up	0.238979	0.278757	0.154347	0.126082	0.0261678	0.151779	103908853		protein_coding
LOC103908877	3.39887	2.89767	3.90007	1.34665	0.42938	0.760785	0.887814	Up	0.0184085	0.0181691	0.205516	0.0534164	0.0443454	0.0551172	103908877		protein_coding
LOC103908890	4.91317	7.45086	2.37548	0.317982	-1.65298	0.114316	0.33139	Down	0.0412477	0.0305334	0.0104658	0.0698187	0.049682	0.102917	103908890		protein_coding
LOC103908923	3.14746	1.58158	4.71334	3.10356	1.63392	0.293363	0.56148	Up	0.45685	0.0450909	0.231834	0.0883768	0.110053	0	103908923		protein_coding
LOC103908930	5.85845	4.03793	7.67897	1.84418	0.882983	0.518838	0.745703	Up	0.462483	0.0326048	0.368802	0.28757	0	0.131879	103908930		protein_coding			dre04080	Neuroactive ligand-receptor interaction
LOC103908936	13.5072	18.0196	8.99474	0.500368	-0.998938	0.244648	0.50862	Down	0.195152	0.406629	0.0440142	0.46141	0.39176	0.259692	103908936		protein_coding
LOC103908963	3.76356	3.98991	3.5372	0.875879	-0.191197	0.91455	0.963123	Down	0.0334222	0	0.0242293	0.00923638	0	0.0476523	103908963		protein_coding
LOC103908992	1.21341	0.339431	2.08738	5.27793	2.39997	0.276409	0.544156	Up	0.0373878	0.0184508	0.0758917	0	0	0.0186572	103908992		protein_coding
LOC103909012	3.35343	3.09286	3.614	1.19322	0.254858	0.837854	0.927587	Up	0.0181025	0.0893355	0.110236	0.035019	0.0654124	0.054201	103909012		protein_coding
LOC103909050	3.4547	0.2978	6.6116	16.7075	4.06243	0.0395599	0.173322	Up	0.0298244	0.0883096	0.544851	0.0288474	0	0	103909050		protein_coding
LOC103909069	5.66786	9.8225	1.51322	0.155687	-2.68328	0.0355044	0.162609	Down	0	0.0488833	0.0335111	0.0638733	0.238619	0.131814	103909069		protein_coding
LOC103909155	4.23196	3.95466	4.50925	1.09975	0.137182	0.922103	0.966715	Up	0.0174612	0.0517023	0.0620263	0.0928904	0	0.0174269	103909155		protein_coding
LOC103909212	17.7572	20.0189	15.4955	0.763126	-0.390007	0.520132	0.746253	Down	0.0836594	0.0596349	0.0990593	0.116883	0.0391868	0.120604	103909212		protein_coding
LOC103909284	793.324	900.264	686.384	0.762777	-0.390667	0.0297454	0.145458	Down	2.30561	2.38104	2.54087	3.11118	2.47439	2.52054	103909284		protein_coding	GO:0000978,GO:0000981,GO:0003677,GO:0003700,GO:0005634,GO:0006260,GO:0006355,GO:0006357,GO:0007519,GO:0048741	RNA polymerase II cis-regulatory region sequence-specific DNA binding|DNA-binding transcription factor activity, RNA polymerase II-specific|DNA binding|DNA-binding transcription factor activity|nucleus|DNA replication|regulation of DNA-templated transcription|regulation of transcription by RNA polymerase II|skeletal muscle tissue development|skeletal muscle fiber development
LOC103909306	63.4777	58.7447	68.2108	1.15798	0.21161	0.674705	0.843093	Up	0.245802	0.662246	0.600077	0.559033	0.296063	0.285101	103909306		protein_coding
LOC103909384	69.0248	64.0386	74.0111	1.14718	0.198094	0.758143	0.886752	Up	0.647109	1.10119	1.0078	1.21944	0.134384	0.835136	103909384		protein_coding
LOC103909385	34.3413	62.1359	6.54663	0.104953	-3.25219	7.70788e-06	0.000330531	Down	0.309381	0.152679	0.392498	2.35656	0.698707	4.09126	103909385		protein_coding
LOC103909394	22.7105	19.4392	25.9819	1.32882	0.410143	0.533104	0.754347	Up	0.560266	0.593941	0.652869	0.220779	0.199949	0.745556	103909394		protein_coding	GO:0000977,GO:0000981,GO:0005634,GO:0006357,GO:0046872	RNA polymerase II transcription regulatory region sequence-specific DNA binding|DNA-binding transcription factor activity, RNA polymerase II-specific|nucleus|regulation of transcription by RNA polymerase II|metal ion binding
LOC103909395	1.36101	0.637231	2.08479	3.02676	1.59777	0.396988	0.653236	Up	0.045809	0.0452132	0.0154975	0.0147694	0	0.0152397	103909395		protein_coding
LOC103909406	15.7926	11.0639	20.5212	1.90209	0.927585	0.430369	0.682075	Up	1.06537	0.725183	0.745704	0	0.840729	0.183324	103909406		protein_coding
LOC103909414	3.05191	3.75875	2.34507	0.630473	-0.665493	0.714281	0.865814	Down	0.0767882	0	0.0259781	0.0742727	0.0616599	0	103909414		protein_coding
LOC103909439	7.28556	5.55779	9.01332	1.69559	0.761786	0.460034	0.704676	Up	0.0849695	0.223639	0.114983	0.0273953	0.136459	0.0424014	103909439		protein_coding
LOC103909460	22.1613	26.0496	18.273	0.704849	-0.504613	0.494627	0.729911	Down	0.745021	1.39326	0.238781	0.682687	1.03905	1.13491	103909460		protein_coding
LOC103909461	4.43108	2.25112	6.61105	2.79081	1.48068	0.2241	0.486635	Up	0.0857428	0.232726	0.152289	0.0622004	0	0.0855745	103909461		protein_coding
LOC103909463	7.87421	8.23234	7.51609	0.898546	-0.154335	0.859032	0.93755	Down	0.109525	0.324303	0.25011	0.238359	0.0989409	0.327932	103909463		protein_coding
LOC103909470	4.57141	4.62276	4.52006	1.0144	0.0206231	0.989065	0.995139	Up	0.0317753	0.141129	0.064499	0	0.153091	0.0317129	103909470		protein_coding
LOC103909472	72.1183	85.0733	59.1633	0.699558	-0.515483	0.370498	0.631199	Down	0.425875	1.05084	0.615929	0.638481	1.28239	0.541925	103909472		protein_coding
LOC103909481	36.853	47.9441	25.7618	0.542978	-0.881035	0.135206	0.365706	Down	0.18589	0.305788	0.269521	0.316792	0.607732	0.229698	103909481		protein_coding
LOC103909492	2.57132	0.976662	4.16598	4.01624	2.00585	0.178728	0.428991	Up	0.318502	0.261967	0.161628	0.0513447	0	0.105959	103909492		protein_coding
LOC103909505	9.23481	12.7718	5.69778	0.449395	-1.15394	0.159707	0.403284	Down	0.0808975	0.133076	0.301051	0.286907	0.357278	0.322955	103909505		protein_coding
LOC103909508	6.09479	4.97296	7.21663	1.40467	0.490232	0.692334	0.853816	Up	0.0881955	0.261145	0.0716094	0.187674	0	0.0880224	103909508		protein_coding
LOC103909509	155.61	164.859	146.361	0.885452	-0.175514	0.464811	0.708215	Down	0.781751	0.848742	0.925654	0.967861	0.627736	0.894649	103909509		protein_coding
LOC103909511	64.9183	76.4049	53.4317	0.695247	-0.524402	0.233679	0.497252	Down	0.712493	0.581515	1.16813	1.48433	0.577624	1.03929	103909511		protein_coding
LOC103909512	10.1982	10.3255	10.0709	0.983061	-0.0246476	0.983247	0.992237	Down	0.347695	0.240221	0	0.151337	0.209396	0.138805	103909512		protein_coding
LOC103909513	12.8822	10.5853	15.1791	1.43973	0.525796	0.410767	0.664798	Up	0.663285	0.458261	0.572207	0.256623	0.27962	0.463389	103909513		protein_coding
LOC103909533	111.887	100.234	123.54	1.2341	0.303457	0.216203	0.476023	Up	2.25734	2.17919	2.39136	1.73715	1.38923	1.61157	103909533		protein_coding
LOC103909535	2.59752	3.70142	1.49363	0.403981	-1.30764	0.492864	0.728938	Down	0.0415012	0.0614422	0	0	0.0499874	0.165679	103909535		protein_coding
LOC103909543	11.7978	9.58641	14.0091	1.45412	0.540149	0.398488	0.65481	Up	0.323655	0.239584	0.390076	0.234789	0.146188	0.181698	103909543		protein_coding
LOC103909545	61.5668	81.4834	41.6501	0.508336	-0.976145	0.132004	0.359991	Down	1.47143	0.833726	1.52105	3.92706	0.459488	2.42038	103909545		protein_coding
LOC103909548	198.13	289.153	107.106	0.369918	-1.43472	0.00295748	0.0305721	Down	2.58843	4.09644	1.26824	7.74833	3.44024	7.81688	103909548		protein_coding
LOC103909601	61.2554	79.179	43.3317	0.546052	-0.872889	0.21055	0.469985	Down	1.19849	1.74088	0.321307	1.39982	0.789871	3.04677	103909601		protein_coding			dre04010,dre04020,dre04510,dre04540,dre04810	MAPK signaling pathway|Calcium signaling pathway|Focal adhesion|Gap junction|Regulation of actin cytoskeleton
LOC103909649	60.9076	51.5007	70.3145	1.3743	0.458694	0.282127	0.550175	Up	5.08852	2.75137	2.64959	1.84033	2.23843	2.34054	103909649		protein_coding
LOC103909721	9.77274	19.5455	0	0.00838936	-6.89722	3.51103e-05	0.00110614	Down	0	0	0	0.147029	0.0732368	0.652357	103909721		protein_coding
LOC103909724	37.4573	70.1068	4.8077	0.0686063	-3.86552	0.301827	0.570262	Down	0	0	0.402527	0.0479519	4.20978	0	103909724		protein_coding
LOC103909728	6.48834	3.74013	9.23655	2.41158	1.26998	0.439021	0.68943	Up	0.206175	0	0.601601	0.199421	0	0.102885	103909728		protein_coding
LOC103909734	2.53934	2.67382	2.40487	0.879259	-0.18564	0.910901	0.960972	Down	0.00505862	0.0149785	0.0205365	0.0048929	0	0.0353408	103909734		protein_coding
LOC103909745	4.93349	4.80936	5.05763	1.03341	0.0474116	0.959876	0.981737	Up	0.135122	0.0952606	0.0979562	0.112025	0.0465005	0.115592	103909745		protein_coding
LOC103909783	37.1261	28.6279	45.6243	1.59019	0.669195	0.1045	0.313639	Up	1.13066	1.13554	0.765025	0.594778	0.430062	0.613716	103909783		protein_coding
LOC103909792	2397.62	2603.72	2191.52	0.841702	-0.248619	0.168302	0.414327	Down	16.4039	18.7073	20.4346	21.0993	16.2859	19.2262	103909792		protein_coding			dre04120,dre04144	Ubiquitin mediated proteolysis|Endocytosis
LOC103909796	105.995	102.681	109.309	1.05796	0.0812802	0.846225	0.931376	Up	1.04885	1.00591	1.57668	1.49303	0.464808	1.07642	103909796		protein_coding
LOC103909805	16.5174	0	33.0347	162.626	7.34541	4.75753e-07	3.13263e-05	Up	0.11211	0.260823	0.512026	0	0	0	103909805		protein_coding
LOC103909810	313.799	432.611	194.986	0.451573	-1.14697	0.000344986	0.00667103	Down	2.01319	2.66705	2.33824	4.22768	5.22573	3.57794	103909810		protein_coding
LOC103909828	1.46368	0.2978	2.62956	6.65937	2.73539	0.302629	0.570595	Up	0.0370646	0.00457282	0	0.0044813	0	0	103909828		protein_coding
LOC103909874	3.26967	0.2978	6.24153	15.7839	3.98038	0.069324	0.245694	Up	0.111898	0	0.227136	0.0154617	0	0	103909874		protein_coding
LOC103910005	71.0662	70.5493	71.5831	1.00587	0.00844242	0.984079	0.992806	Up	0.915912	0.766684	1.10608	1.22233	0.377042	0.844689	103910005		protein_coding
LOC103910036	4.66043	5.12651	4.19435	0.797744	-0.326003	0.793237	0.903612	Down	0.0127932	0.0126268	0.0649206	0.0680575	0.00770457	0.0255362	103910036		protein_coding
LOC103910066	179.811	186.613	173.009	0.925709	-0.111369	0.792005	0.903195	Down	3.80318	2.81005	5.75757	3.43198	2.27763	5.81021	103910066		protein_coding
LOC103910098	821.482	1351.86	291.099	0.215342	-2.2153	0.112142	0.327756	Down	28.1112	0.61581	5.83984	12.5055	27.6387	93.1974	103910098		protein_coding
LOC103910107	116.529	101.019	132.039	1.30169	0.380382	0.529586	0.752068	Up	1.88415	1.1444	0.761446	1.105	0.205377	1.28483	103910107		protein_coding
LOC103910140	13055.4	15406.1	10704.7	0.694884	-0.525156	0.178119	0.428313	Down	755.269	566.581	579.182	617.792	1079.87	534.479	103910140		protein_coding
LOC103910141	2255.01	3174.03	1336	0.420946	-1.24829	0.290228	0.558633	Down	10.7739	61.7628	29.9289	40.8078	141.068	9.98799	103910141		protein_coding	GO:0001530,GO:0001971,GO:0032496,GO:0050829	lipopolysaccharide binding|negative regulation of activation of membrane attack complex|response to lipopolysaccharide|defense response to Gram-negative bacterium
LOC103910150	13.021	16.9425	9.0994	0.542901	-0.88124	0.493399	0.729013	Down	0.098286	0	0.040808	0.0172848	0.123765	0.0579641	103910150		protein_coding
LOC103910162	2.29005	3.68846	0.891648	0.243662	-2.03705	0.189482	0.443465	Down	0.0233158	0	0.0473275	0.0902078	0.0842501	0.06981	103910162		protein_coding
LOC103910163	17.1826	24.9375	9.4277	0.376487	-1.40933	0.098287	0.302574	Down	0.52093	0.122418	0.151058	0.527858	0.20915	1.08933	103910163		protein_coding
LOC103910169	3.34698	4.32569	2.36827	0.549329	-0.864257	0.457326	0.703352	Down	0.0653654	0.0161288	0.0497557	0.07903	0.0590485	0.0652371	103910169		protein_coding
LOC103910188	2.55151	4.19076	0.912255	0.22059	-2.18056	0.256488	0.522278	Down	0	0.0345785	0	0.0338864	0.0843958	0.0116551	103910188		protein_coding
LOC103910189	11.2561	11.2038	11.3084	0.998829	-0.00169075	0.998906	0.999269	Down	0.0569389	0.0456612	0.0325061	0.106705	0.0171455	0	103910189		protein_coding
LOC103910211	5.57213	11.1443	0	0.0149588	-6.06286	0.00109236	0.0151638	Down	0	0	0	0.191928	0.580437	0.0565827	103910211		protein_coding
LOC103910221	36.0652	36.5064	35.624	0.978321	-0.0316198	0.968548	0.985096	Down	0.0351606	0.41644	0.378265	0.217656	0.271042	0.231605	103910221		protein_coding
LOC103910274	1501.92	1648.43	1355.41	0.822465	-0.281974	0.202297	0.459272	Down	5.50122	5.82626	7.50048	7.35243	6.18204	5.98241	103910274		protein_coding
LOC103910397	6.51474	8.57743	4.45205	0.523894	-0.932653	0.365123	0.626581	Down	0.0385402	0.00633983	0.0521539	0.0683423	0.0618946	0.0256431	103910397		protein_coding
LOC103910408	25.3927	22.1926	28.5928	1.28511	0.361889	0.645971	0.827073	Up	0.498116	1.69342	0.421292	0.347965	0.366649	1.04952	103910408		protein_coding
LOC103910448	9.2584	5.19681	13.32	2.50015	1.32201	0.204297	0.461987	Up	0.221414	0.104897	0.0719099	0.111364	0.0213351	0.00883919	103910448		protein_coding
LOC103910452	9.607	11.501	7.71298	0.675046	-0.566943	0.485438	0.723547	Down	0.222113	0.0913436	0.169071	0.107418	0.178354	0.314043	103910452		protein_coding
LOC103910459	76.3509	75.5307	77.1711	1.01769	0.0252925	0.96372	0.983409	Up	1.90325	0.626165	1.94905	2.20576	0.722837	0.9412	103910459		protein_coding
LOC103910472	25.5149	22.189	28.8408	1.30196	0.380686	0.489256	0.726224	Up	0.697948	0.512648	0.362419	0.251194	0.273705	0.502185	103910472		protein_coding
LOC103910498	23.8615	26.0288	21.6943	0.826019	-0.275753	0.641538	0.824434	Down	0.439244	0.179392	0.491917	0.512756	0.200678	0.453499	103910498		protein_coding
LOC103910510	20.7319	17.8281	23.6358	1.32034	0.400914	0.435294	0.686269	Up	0.291171	0.373599	0.487601	0.281632	0.19289	0.276069	103910510		protein_coding
LOC103910514	13.8527	12.0234	15.6821	1.28978	0.36712	0.615245	0.809236	Up	0.324315	0.149379	0.0987466	0.156845	0.0651052	0.161839	103910514		protein_coding
LOC103910520	7.16321	2.56755	11.7589	4.87553	2.28556	0.0706907	0.248687	Up	0.12574	0.682577	0.414754	0.0608105	0.151451	0	103910520		protein_coding
LOC103910566	78.7066	59.8387	97.5745	1.62406	0.699609	0.461292	0.705711	Up	1.06687	0.373643	0.454073	0.504863	0.00690872	0.543837	103910566		protein_coding
LOC103910575	26.919	46.5893	7.24861	0.156212	-2.67842	0.00229461	0.0255267	Down	0.00970987	0.124587	0.0985478	0.26297	0.690025	0.261652	103910575		protein_coding
LOC103910576	3.99059	5.30162	2.67956	0.519823	-0.943909	0.534957	0.755455	Down	0.0618054	0.0610016	0.015682	0	0.148887	0.0616842	103910576		protein_coding
LOC103910581	64.8041	85.8347	43.7735	0.513611	-0.961252	0.0194644	0.109744	Down	0.552492	0.40898	0.490646	0.830217	0.986316	0.551408	103910581		protein_coding
LOC103910593	1.64063	2.3824	0.898855	0.369041	-1.43815	0.576867	0.783103	Down	0.00857101	0.0169191	0	0.0663218	0	0	103910593		protein_coding
LOC103910633	5.41898	5.20978	5.62819	1.05276	0.0741708	0.945416	0.976563	Up	0.113293	0.0248487	0.102208	0.109581	0.0151621	0.0753803	103910633		protein_coding
LOC103910662	5.11133	6.40098	3.82169	0.586241	-0.770435	0.53165	0.753543	Down	0.0678542	0.0074413	0.0229556	0.0948008	0.009081	0.0451474	103910662		protein_coding
LOC103910678	5.84288	5.99418	5.69158	0.941252	-0.087347	0.93688	0.97388	Down	0.116821	0.172952	0.26677	0.0564969	0.0703542	0.378923	103910678		protein_coding
LOC103910690	8.73761	6.4039	11.0713	1.71652	0.779484	0.354589	0.617956	Up	0.322933	0.492588	0.268162	0.113583	0.106082	0.3223	103910690		protein_coding
LOC103910701	2.97606	2.71179	3.24032	1.22903	0.297525	0.825472	0.920165	Up	0.0716799	0.0101068	0.0311784	0.0297136	0.0370016	0.0102199	103910701		protein_coding
LOC103910726	2.11829	2.46566	1.77091	0.698429	-0.517815	0.785601	0.900161	Down	0.116518	0.0575015	0	0.169052	0	0.0581449	103910726		protein_coding
LOC103910729	3.19167	3.72077	2.66256	0.702657	-0.509107	0.679133	0.846659	Down	0.0515596	0.0203556	0.0209316	0.0398964	0.0124205	0.0617501	103910729		protein_coding
LOC103910773	16.3158	20.8727	11.7589	0.561783	-0.831916	0.313099	0.580786	Down	0.0452867	0.245837	0.149378	0.383277	0.204551	0.101695	103910773		protein_coding
LOC103910799	9.89244	9.27637	10.5085	1.105	0.144041	0.876042	0.945184	Up	0.110031	0.2534	0.279183	0.372493	0.0441768	0.109815	103910799		protein_coding
LOC103910801	10.1586	8.32491	11.9923	1.43919	0.52526	0.481854	0.721143	Up	0.161194	0.300518	0.254489	0.103942	0.107864	0.214504	103910801		protein_coding
LOC103910803	13.8694	19.5897	8.14903	0.419781	-1.25229	0.322525	0.589131	Down	0	0.320097	0.559564	0.219584	1.17189	0.258943	103910803		protein_coding
LOC103910812	9.12574	7.17607	11.0754	1.53086	0.614341	0.724169	0.868974	Up	0.647121	0	0.0562953	0.125184	0	0.276793	103910812		protein_coding
LOC103910813	2.43897	2.76274	2.1152	0.790304	-0.339521	0.871643	0.94332	Down	0.0316116	0.187203	0	0.030576	0.190378	0	103910813		protein_coding
LOC103910847	2.90351	2.21881	3.58821	1.63762	0.711601	0.576321	0.782723	Up	0.0780155	0.115501	0.0395899	0.0565948	0.0469841	0.0194656	103910847		protein_coding
LOC103910871	880.325	864.157	896.493	1.03733	0.052878	0.928303	0.969751	Up	2.48065	5.66741	16.2947	8.87378	5.50556	6.00681	103910871		protein_coding
LOC103910884	1.6988	0.678862	2.71875	3.855	1.94673	0.423523	0.677253	Up	0	0.126821	0.163012	0	0	0.0641198	103910884		protein_coding
LOC103910886	5.76286	4.04724	7.47848	1.80567	0.852531	0.388192	0.646098	Up	0.0352905	0.0406368	0.0716343	0.0455125	0.0141689	0.0117404	103910886		protein_coding
LOC103910897	4.89722	4.10184	5.6926	1.35884	0.442376	0.681027	0.847528	Up	0.0278282	0.0494394	0.0282436	0.01615	0.00670371	0.0444378	103910897		protein_coding
LOC103910901	48.6289	37.1718	60.0859	1.59925	0.677397	0.122029	0.344154	Up	1.86068	1.23907	1.4334	0.932387	0.405027	1.11869	103910901		protein_coding
LOC103910908	4.73603	1.80908	7.66298	4.2397	2.08396	0.10257	0.310279	Up	0.244647	0.0301831	0.124149	0.0147895	0.018417	0.0457812	103910908		protein_coding
LOC103910919	2.17966	1.08859	3.27073	3.03058	1.59959	0.314172	0.581271	Up	0.0763483	0.0602843	0.0309951	0.0295389	0.018392	0	103910919		protein_coding
LOC103910940	13.7601	16.4159	11.1043	0.678287	-0.560033	0.505799	0.737892	Down	0.116569	0.258869	0.162674	0.0704687	0.193057	0.40719	103910940		protein_coding
LOC103910941	5.78849	7.1631	4.41387	0.609056	-0.715354	0.605094	0.801858	Down	0.163098	0.0585369	0	0.157755	0.0178589	0.14798	103910941		protein_coding
LOC103910973	16.2877	15.0173	17.5582	1.15841	0.212143	0.745066	0.880611	Up	0.265749	0.19672	0.191048	0.128522	0.0800224	0.276279	103910973		protein_coding
LOC103910991	8.9942	10.1986	7.78977	0.753128	-0.409033	0.664062	0.837872	Down	0.093392	0.153629	0.157976	0.105388	0.0374963	0.326231	103910991		protein_coding
LOC103910998	8.74634	12.0614	5.4313	0.448116	-1.15806	0.210466	0.469985	Down	0.0257719	0.228931	0.209252	0.42377	0.248334	0.231492	103910998		protein_coding
LOC103910999	75.9627	95.6276	56.2978	0.587975	-0.766173	0.0519873	0.205402	Down	0.36433	0.576845	0.485319	0.602007	0.521108	0.962064	103910999		protein_coding
LOC103911004	18.9548	8.34061	29.569	3.55541	1.83001	0.0361796	0.164386	Up	0.350948	2.11294	0.961702	0.441287	0.295897	0.105078	103911004		protein_coding
LOC103911012	57.8662	55.3208	60.4116	1.08672	0.119984	0.814892	0.913903	Up	0.829784	0.621645	0.578356	0.435145	0.252875	0.927934	103911012		protein_coding
LOC103911023	2.06174	1.72582	2.39766	1.3691	0.453229	0.772783	0.893526	Up	0.0414248	0.0408861	0.252258	0.120203	0.0498954	0.0413435	103911023		protein_coding
LOC103911026	924.578	733.949	1115.21	1.52081	0.604836	0.191108	0.445781	Up	35.6542	26.75	21.0427	16.3922	21.6199	7.2013	103911026		protein_coding
LOC103911065	97.85	50.4903	145.21	2.86849	1.52029	9.74802e-05	0.00249167	Up	1.46205	1.99906	3.06303	0.817353	0.516993	0.629187	103911065		protein_coding	GO:0005216,GO:0006811,GO:0016020,GO:0050896,GO:0055085	monoatomic ion channel activity|monoatomic ion transport|membrane|response to stimulus|transmembrane transport
LOC103911083	8.81513	11.7702	5.86009	0.499819	-1.00052	0.382834	0.641168	Down	0.602207	0.0742969	0.0763993	0.14562	0.317339	0.788846	103911083		protein_coding
LOC103911105	5.32122	7.14082	3.50162	0.48577	-1.04165	0.560693	0.772414	Down	0.0932865	0.00837029	0	0.131244	0	0.0592476	103911105		protein_coding
LOC103911119	4.6073	2.30207	6.91254	3.07834	1.62215	0.169425	0.416005	Up	0.0871932	0.240966	0.0707956	0.0168674	0.042009	0.0522133	103911119		protein_coding
LOC103911143	29.3609	6.97723	51.7446	7.1617	2.8403	2.20195e-05	0.000761681	Up	1.38103	2.09328	0.775908	0.262387	0.0594079	0.196903	103911143		protein_coding
LOC103911146	22.269	24.5075	20.0306	0.811272	-0.301742	0.572857	0.780348	Down	0.262433	0.274256	0.501364	0.447945	0.24172	0.415987	103911146		protein_coding
LOC103911178	2.13245	3.10217	1.16274	0.387321	-1.3684	0.513435	0.742494	Down	0.153286	0	0	0.0370661	0.230787	0.0382463	103911178		protein_coding
LOC103911231	2.96645	3.56722	2.36568	0.651886	-0.617308	0.724835	0.869295	Down	0.30804	0.18242	0	0.238359	0	0.43041	103911231		protein_coding
LOC103911233	6.68497	5.63174	7.7382	1.40573	0.491323	0.668455	0.840302	Up	0.154161	0.152156	0.0260769	0.0124259	0.0928418	0.0897507	103911233		protein_coding			dre00270,dre00380,dre00450	Cysteine and methionine metabolism|Tryptophan metabolism|Selenocompound metabolism
LOC103911265	4.72832	3.56356	5.89308	1.65695	0.728533	0.588475	0.790553	Up	0.309955	0.0705978	0.096794	0.161431	0.0861541	0	103911265		protein_coding
LOC103911277	3.9951	5.31166	2.67855	0.512032	-0.965695	0.391095	0.648395	Down	0.0667658	0.0219658	0.112937	0.107631	0.13403	0.0888463	103911277		protein_coding
LOC103911305	3.56466	4.77704	2.35228	0.496684	-1.0096	0.463458	0.707307	Down	0.251324	0.0826852	0	0.243091	0.20181	0.125416	103911305		protein_coding
LOC103911332	18.9226	22.6265	15.2188	0.675009	-0.567021	0.542005	0.759839	Down	0.372577	0.169722	0.9308	0.970231	0.759443	0.114414	103911332		protein_coding
LOC103911449	1.64053	2.37602	0.905048	0.376426	-1.40956	0.58665	0.789473	Down	0	0.0334224	0.0687364	0	0	0.236575	103911449		protein_coding
LOC103911473	732.469	717.537	747.401	1.04161	0.0588185	0.784648	0.89989	Up	7.27553	8.32196	6.14019	6.93629	5.14067	5.8732	103911473		protein_coding			dre04530	Tight junction
LOC103911498	3.29362	4.47924	2.10799	0.474121	-1.07667	0.373349	0.633908	Down	0.00554736	0.0219009	0.0112603	0.0268281	0.0267267	0.0166094	103911498		protein_coding
LOC103911535	8.7911	9.53474	8.04747	0.860267	-0.217143	0.766878	0.891	Down	0.227195	0.201816	0.184469	0.175802	0.246287	0.1814	103911535		protein_coding
LOC103911540	4183.09	6235.95	2130.23	0.341582	-1.5497	0.0171531	0.100792	Down	39.6818	39.5367	88.9414	162.094	25.1855	253.732	103911540		protein_coding	GO:0002381,GO:0002503,GO:0006955,GO:0016020,GO:0019882,GO:0019886,GO:0023026,GO:0042613,GO:0050870	immunoglobulin production involved in immunoglobulin-mediated immune response|peptide antigen assembly with MHC class II protein complex|immune response|membrane|antigen processing and presentation|antigen processing and presentation of exogenous peptide antigen via MHC class II|MHC class II protein complex binding|MHC class II protein complex|positive regulation of T cell activation	dre04514,dre04145,dre04672,dre05168	Cell adhesion molecules|Phagosome|Intestinal immune network for IgA production|Herpes simplex virus 1 infection
LOC103911582	3.00559	1.81839	4.19278	2.50652	1.32569	0.377706	0.637122	Up	0.074693	0.129013	0.0568558	0	0.0674746	0.0186366	103911582		protein_coding
LOC103911589	259.96	242.897	277.023	1.13882	0.187538	0.501412	0.734656	Up	7.60628	5.6415	7.4715	5.24893	3.64322	6.74787	103911589		protein_coding
LOC103911612	44.7828	39.2167	50.3489	1.27708	0.35285	0.457822	0.703452	Up	0.472185	0.879128	0.446557	0.581275	0.297295	0.353444	103911612		protein_coding
LOC103911624	49.5032	26.2627	72.7437	2.72772	1.4477	0.00398847	0.0381663	Up	2.1052	0.981195	1.70138	0.79187	0.234785	0.505814	103911624		protein_coding
LOC103911657	25.2931	28.7965	21.7897	0.761814	-0.392489	0.511612	0.741667	Down	0.225526	0.155815	0.446339	0.34902	0.353134	0.213829	103911657		protein_coding
LOC103911715	4.48092	6.56677	2.39507	0.37014	-1.43386	0.187019	0.440053	Down	0.0393258	0.0582216	0.0598691	0.0570563	0.142102	0.156995	103911715		protein_coding
LOC103911722	44.5074	40.5396	48.4752	1.19421	0.256052	0.743344	0.879998	Up	0.120341	0.615477	1.03262	0.264543	0.27672	0.73155	103911722		protein_coding
LOC103911723	2.39259	3.58584	1.19934	0.342947	-1.54394	0.277228	0.544982	Down	0.0888453	0.17538	0.0901713	0.17187	0.42805	0.266013	103911723		protein_coding
LOC103911745	1.25679	2.20949	0.304085	0.142291	-2.81308	0.268299	0.53503	Down	0	0.0271132	0	0.106282	0	0.0822497	103911745		protein_coding
LOC103911752	55.7458	63.6253	47.8664	0.747778	-0.419319	0.271092	0.538397	Down	0.407961	0.520505	0.666518	0.779567	0.407486	0.665359	103911752		protein_coding
LOC103911757	10.1278	5.6898	14.5657	2.51241	1.32907	0.157744	0.400805	Up	0.688366	0.494119	0.34932	0.393436	0.113062	0.031228	103911757		protein_coding
LOC103911768	21.852	24.4852	19.2188	0.777255	-0.363539	0.536094	0.756047	Down	0.408655	0.992839	0.606179	1.06418	0.454354	0.75296	103911768		protein_coding
LOC103911879	103.395	65.6164	141.173	2.16137	1.11195	0.0211508	0.116331	Up	3.29315	6.32148	2.55277	1.80582	1.87395	1.11281	103911879		protein_coding
LOC103911894	43.5504	19.8997	67.2012	3.34639	1.74261	0.000243699	0.00508712	Up	0.841401	0.791531	1.33431	0.394202	0.190022	0.183695	103911894		protein_coding
LOC103911910	56.8213	67.8243	45.8183	0.673441	-0.570376	0.352478	0.616076	Down	0.528699	0.615006	1.76308	1.16887	0.636808	1.94104	103911910		protein_coding			dre04060,dre04672	Cytokine-cytokine receptor interaction|Intestinal immune network for IgA production
LOC103911912	30.7421	50.9124	10.5719	0.208135	-2.26441	0.0258249	0.132111	Down	0.252353	0.0711631	0	0.305107	0.390798	0.60266	103911912		protein_coding
LOC103911930	9.686	11.8755	7.4965	0.631033	-0.664213	0.38248	0.640899	Down	0.165496	0.326688	0.19596	0.453545	0.299005	0.1927	103911930		protein_coding
LOC103911956	2.43397	2.46566	2.40228	0.934197	-0.0982018	0.950846	0.97897	Down	0.0457779	0.112956	0.0232306	0.132835	0	0.0456881	103911956		protein_coding
LOC103911967	919.09	987.741	850.438	0.861469	-0.215129	0.339538	0.605326	Down	18.8478	22.1809	17.582	21.976	18.8809	17.2073	103911967		protein_coding			dre00450,dre00970	Selenocompound metabolism|Aminoacyl-tRNA biosynthesis
LOC103911968	1044.47	1312.1	776.838	0.592358	-0.755458	0.0062635	0.0517611	Down	35.7589	39.681	54.6417	64.6824	65.9298	54.7793	103911968		protein_coding
LOC103911969	143.118	137.522	148.714	1.08241	0.114245	0.6246	0.813826	Up	7.78357	8.5466	7.89973	7.01099	5.62509	6.5545	103911969		protein_coding
LOC103912045	5.77484	3.4646	8.08508	2.29121	1.19611	0.266809	0.533522	Up	0.0459571	0.0793789	0.0291518	0.0111129	0.0069193	0.0401335	103912045		protein_coding
LOC103912062	1.93085	2.0846	1.7771	0.823389	-0.280353	0.890171	0.951567	Down	0.0133461	0.00439085	0.0090302	0.0301208	0	0	103912062		protein_coding
LOC103912069	2.80659	2.36305	3.25012	1.34696	0.429709	0.745454	0.880967	Up	0.168245	0.0276762	0.113837	0.108489	0.0337747	0.0559717	103912069		protein_coding
LOC107197950	5.44728	3.20478	7.68978	2.50773	1.32638	0.225947	0.489002	Up	0.247076	0.0696752	0.143294	0.0512105	0.0850282	0.0176137	107197950	uncharacterized LOC107197950	protein_coding
LOC107988037	28.1742	19.5309	36.8176	1.90144	0.927096	0.063528	0.233266	Up	1.05561	0.62872	0.572624	0.387286	0.350747	0.272466	107988037	uncharacterized LOC107988037	protein_coding
LOC108178999	499.787	433.607	565.966	1.30464	0.38365	0.111583	0.326615	Up	13.4559	13.6409	11.3326	11.2902	7.12731	7.03833	108178999		protein_coding
LOC108179015	6.624	7.01886	6.22915	0.871992	-0.197613	0.841891	0.929644	Down	0.188027	0.0412403	0.212036	0.202074	0.0503276	0.187658	108179015		protein_coding
LOC108179017	5.71655	4.59117	6.84194	1.52447	0.60831	0.551468	0.765907	Up	0.152352	0.120297	0.0773129	0.0884166	0.0917525	0.0152053	108179017		protein_coding
LOC108179023	440.544	524.571	356.516	0.680499	-0.555335	0.00734458	0.0573617	Down	24.9037	27.1138	24.624	35.1385	31.0784	29.7874	108179023		protein_coding
LOC108179035	66.1586	43.3179	88.9994	2.05347	1.03806	0.00899926	0.0653036	Up	6.73341	3.29968	4.1099	2.41384	1.64474	1.83278	108179035		protein_coding
LOC108179043	8.06361	6.75831	9.36892	1.41181	0.497547	0.743951	0.880386	Up	0.486941	0.0890015	0	0.0872201	0.217226	0.0179995	108179043		protein_coding	GO:0005737,GO:0005764,GO:0005886,GO:0005938,GO:0006897,GO:0007165,GO:0016020,GO:0030036	cytoplasm|lysosome|plasma membrane|cell cortex|endocytosis|signal transduction|membrane|actin cytoskeleton organization
LOC108179047	741.02	701.186	780.854	1.112	0.153163	0.546346	0.762325	Up	14.1241	13.9404	13.5287	15.2289	6.90822	10.6555	108179047		protein_coding
LOC108179048	3.59772	2.77278	4.42266	1.58695	0.666256	0.656515	0.833485	Up	0.364767	0.0400026	0.205673	0.235212	0.0976344	0	108179048		protein_coding
LOC108179059	797.787	864.029	731.545	0.847129	-0.239347	0.172877	0.420448	Down	14.135	14.5154	13.8186	16.336	13.1028	13.4503	108179059		protein_coding	GO:0006811,GO:0033178,GO:0046961,GO:1902600	monoatomic ion transport|proton-transporting two-sector ATPase complex, catalytic domain|proton-transporting ATPase activity, rotational mechanism|proton transmembrane transport	dre00190,dre04150,dre04145	Oxidative phosphorylation|mTOR signaling pathway|Phagosome
LOC108179061	677.071	749.645	604.497	0.807265	-0.308885	0.12208	0.344205	Down	12.8212	14.1619	13.706	14.8892	13.9906	13.9794	108179061		protein_coding
LOC108179064	12.5921	9.28495	15.8992	1.72331	0.785184	0.443176	0.692774	Up	0.185671	0.274885	1.19347	0.41904	0.335456	0.061769	108179064		protein_coding
LOC108179085	41.0137	40.6764	41.3511	1.01524	0.0218201	0.956795	0.980432	Up	0.248213	0.186853	0.149443	0.211598	0.136816	0.146956	108179085		protein_coding
LOC108179086	6.89128	6.97723	6.80534	0.95578	-0.0652493	0.944387	0.976426	Down	0.427357	0.194677	0.133457	0.349764	0.0791913	0.262473	108179086		protein_coding
LOC108179089	91.0781	103.296	78.8606	0.762396	-0.391388	0.513034	0.74222	Down	1.51754	0.644217	2.18608	1.10482	0.864789	2.91513	108179089		protein_coding
LOC108179091	9.32532	10.579	8.07168	0.765384	-0.385745	0.757935	0.886609	Down	0.145453	0.207366	0.0820131	0	0.136263	0.338724	108179091		protein_coding
LOC108179093	28.901	20.7911	37.0108	1.76407	0.818911	0.353097	0.61664	Up	2.77367	0.500421	0.484312	0.836574	0.143692	0.892976	108179093		protein_coding
LOC108179094	7.82925	9.76643	5.89207	0.59721	-0.74369	0.642139	0.82464	Down	0.179581	0	0.121507	0.434245	0.0180251	0.0149357	108179094		protein_coding
LOC108179096	300.616	394.219	207.014	0.526188	-0.926351	0.0453666	0.18881	Down	3.15954	2.12507	3.5946	2.68635	6.72119	4.24684	108179096		protein_coding
LOC108179097	6.69289	8.42094	4.96484	0.588284	-0.765414	0.6352	0.820138	Down	0.528069	0.0347468	0.03573	0.681026	0.212016	0	108179097		protein_coding
LOC108179099	1.3536	0.5956	2.11159	3.19985	1.67801	0.449246	0.69705	Up	0.00779705	0.0384782	0.00791341	0.0150832	0	0	108179099		protein_coding
LOC108179100	53.3377	55.9528	50.7227	0.905087	-0.143872	0.751119	0.883228	Down	0.348982	0.755554	0.799785	0.620656	0.47458	0.719066	108179100		protein_coding
LOC108179101	9.89792	10.2645	9.53129	0.951845	-0.0712014	0.926637	0.96916	Down	0.288368	0.262724	0.157592	0.128733	0.293897	0.199248	108179101		protein_coding	GO:0005694,GO:0006357,GO:0043035,GO:0046872	chromosome|regulation of transcription by RNA polymerase II|chromatin insulator sequence binding|metal ion binding
LOC108179102	2.67473	1.76745	3.58202	2.01288	1.00926	0.523527	0.748257	Up	0.116338	0.160755	0	0.0450106	0.0280253	0.0464438	108179102		protein_coding
LOC108179107	1.98786	2.77278	1.20294	0.431254	-1.21339	0.545915	0.76223	Down	0.00857537	0.0253915	0	0.0497666	0.0206577	0	108179107		protein_coding
LOC108179108	4.03277	3.36199	4.70354	1.40765	0.49329	0.748367	0.8824	Up	0.133252	0.0119563	0.0491784	0	0.0291817	0.0846304	108179108		protein_coding
LOC108179110	618.112	712.942	523.281	0.733945	-0.446257	0.0584883	0.220982	Down	6.479	8.6607	9.52046	10.6535	8.26188	9.9384	108179110		protein_coding
LOC108179111	11.475	12.2595	10.6904	0.885957	-0.174692	0.811162	0.912891	Down	0.24423	0.155976	0.116647	0.0972709	0.190346	0.200736	108179111		protein_coding
LOC108179114	39.6355	33.2426	46.0284	1.37128	0.455524	0.420796	0.674314	Up	0.756094	0.389353	0.556071	0.67833	0.197978	0.218728	108179114		protein_coding
LOC108179115	2.2775	0.2978	4.25719	10.7557	3.42703	0.255028	0.520373	Up	0	0.124006	0	0.00868028	0	0	108179115		protein_coding
LOC108179116	200.954	257.166	144.742	0.563209	-0.828258	0.257778	0.523688	Down	3.59351	0.75898	2.91171	0.872522	3.50896	6.16929	108179116		protein_coding
LOC108179118	4.39625	3.79107	5.00144	1.30622	0.385403	0.740865	0.87872	Up	0.113166	0.0279236	0.0191425	0.0547294	0.0227177	0.028236	108179118		protein_coding
LOC108179126	1.87543	2.869	0.881851	0.307609	-1.70083	0.423979	0.677333	Down	0.0264069	0	0.0134005	0	0.0159033	0.0922428	108179126		protein_coding
LOC108179131	1.73832	0.492987	2.98365	7.54332	2.9152	0.153383	0.394249	Up	0.134775	0.166278	0.0341967	0	0.0405836	0	108179131		protein_coding	GO:0000166,GO:0004672,GO:0004674,GO:0005524,GO:0005737,GO:0006468,GO:0007346,GO:0043066,GO:0046777,GO:0106310	nucleotide binding|protein kinase activity|protein serine/threonine kinase activity|ATP binding|cytoplasm|protein phosphorylation|regulation of mitotic cell cycle|negative regulation of apoptotic process|protein autophosphorylation|protein serine kinase activity
LOC108179134	3.35305	6.12473	0.58137	0.0974313	-3.35947	0.0667712	0.240221	Down	0.030706	0	0	0.01485	0.129447	0.10726	108179134		protein_coding
LOC108179143	34.9335	40.2309	29.6361	0.739625	-0.435134	0.328299	0.594633	Down	0.277095	0.404767	0.416221	0.353783	0.400506	0.508854	108179143		protein_coding
LOC108179145	1.18774	0	2.37548	11.7034	3.54886	0.151467	0.391289	Up	0.106335	0.0787137	0.0269804	0	0	0	108179145		protein_coding
LOC108179151	2.09098	0	4.18197	20.591	4.36394	0.0289256	0.142874	Up	0.0697906	0.068883	0.106248	0	0	0	108179151		protein_coding
LOC108179157	14.4127	11.7435	17.082	1.49567	0.580792	0.435723	0.686681	Up	0.73795	1.21392	1.56034	0.356888	1.03699	0.552377	108179157		protein_coding
LOC108179158	4.61642	8.0335	1.19934	0.148048	-2.75586	0.020044	0.111934	Down	0.0217534	0.0429409	0.022078	0.273529	0.131007	0.108553	108179158		protein_coding
LOC108179160	106.894	128.609	85.1788	0.661249	-0.596735	0.449389	0.697113	Down	0.485274	5.50808	3.76423	8.51584	2.58851	2.28323	108179160		protein_coding
LOC108179161	87.6772	120.084	55.2705	0.461588	-1.11532	0.000231171	0.00488033	Down	0.892834	1.07539	0.829365	1.77108	1.6769	1.72175	108179161		protein_coding
LOC108179162	50.519	41.5269	59.5111	1.43941	0.52548	0.426531	0.679411	Up	0.667038	1.85539	0.461586	0.35192	0.657355	0.74138	108179162		protein_coding
LOC108179175	2.07753	3.24641	0.908652	0.285578	-1.80804	0.279916	0.548004	Down	0	0.0244476	0.0125697	0.0239583	0.0596694	0.0247212	108179175		protein_coding
LOC108179178	2.03773	3.1668	0.908652	0.283258	-1.81981	0.313385	0.580899	Down	0	0.0270802	0.0139232	0.0132691	0.0165237	0.095841	108179178		protein_coding
LOC108179194	174.119	194.315	153.923	0.793605	-0.333508	0.184744	0.436909	Down	2.02687	1.74009	2.43446	2.47089	2.09463	2.09471	108179194		protein_coding
LOC108179200	1.86475	1.65552	2.07398	1.22379	0.291359	0.884106	0.948982	Up	0.15072	0	0.203959	0.0485941	0	0.200565	108179200		protein_coding
LOC108179231	72.8469	48.9597	96.7342	1.98103	0.986253	0.401082	0.657079	Up	2.69952	0.118796	0.034902	0.216205	0.559179	0.368954	108179231		protein_coding
LOC108179236	2.21595	2.9393	1.49261	0.509514	-0.972805	0.548012	0.76357	Down	0.0363415	0	0.147535	0.0703019	0.0875451	0.145081	108179236		protein_coding
LOC108179274	24.3308	28.3172	20.3445	0.717405	-0.479141	0.353248	0.616852	Down	0.179045	0.209851	0.374792	0.368007	0.256092	0.290378	108179274		protein_coding
LOC108179275	58.3582	60.8465	55.87	0.921252	-0.118332	0.782101	0.898838	Down	0.501818	0.53198	0.707372	0.71908	0.570851	0.324614	108179275		protein_coding
LOC108179332	665.835	575.454	756.216	1.31487	0.394923	0.121416	0.342993	Up	6.37702	8.18057	7.72372	5.94661	4.68923	3.87672	108179332		protein_coding
LOC108179342	25.6927	33.3628	18.0227	0.538472	-0.893056	0.514918	0.74346	Down	0.0286841	0.0283111	1.68851	1.2485	0.138198	1.51728	108179342		protein_coding
LOC108179354	1.68558	1.28378	2.08738	1.73796	0.797393	0.656696	0.833577	Up	0.00661272	0.00326336	0.0134228	0.00319804	0.00796489	0	108179354		protein_coding
LOC108179508	2.22785	3.55425	0.901444	0.24923	-2.00445	0.301457	0.569855	Down	0	0	0.038016	0.0966131	0.0150387	0.0249223	108179508		protein_coding
LOC108179575	125.845	156.043	95.6471	0.614192	-0.703239	0.100598	0.306921	Down	1.15882	0.383574	0.745828	1.07985	1.05534	0.994347	108179575		protein_coding
LOC108179621	31.1443	35.6309	26.6576	0.742686	-0.429176	0.410845	0.664871	Down	0.295741	0.430161	0.663501	0.812993	0.356215	0.466044	108179621		protein_coding
LOC108179657	44.0648	47.8181	40.3115	0.849115	-0.235968	0.667948	0.840109	Down	1.34566	1.53477	1.1533	0.607404	1.54879	1.7907	108179657		protein_coding
LOC108179660	7.34264	6.71102	7.97427	1.20077	0.263954	0.77301	0.893526	Up	0.614539	0.189546	0.233891	0.148602	0.231312	0.345	108179660		protein_coding
LOC108179661	2.53934	2.67382	2.40487	0.879259	-0.18564	0.910901	0.960972	Down	0.0260704	0.0771942	0.105838	0.0252164	0	0.182135	108179661		protein_coding
LOC108179687	2.05246	1.47896	2.62596	1.87176	0.904395	0.721271	0.868065	Up	0.0363366	0	0.00460986	0	0.0164125	0	108179687		protein_coding
LOC108179693	9.97859	6.75265	13.2045	1.97018	0.978325	0.321424	0.587948	Up	0.653443	1.50487	0.221065	0.158009	0.327941	0.543467	108179693		protein_coding	GO:0060271	cilium assembly
LOC108179742	6.85936	7.78025	5.93846	0.774117	-0.369376	0.729185	0.8721	Down	0.326985	0.0806832	0.414832	0.0790683	0.344616	0.448722	108179742		protein_coding
LOC108179808	26.6472	31.5285	21.7659	0.692861	-0.529362	0.266383	0.533322	Down	0.831557	0.689424	0.911485	0.804316	0.881403	1.29468	108179808		protein_coding
LOC108180010	2.7612	4.62714	0.895251	0.190423	-2.39272	0.163991	0.409031	Down	0.0557116	0.054987	0.056543	0.161659	0	0.611625	108180010		protein_coding
LOC108180085	34.7459	38.2658	31.226	0.811783	-0.300834	0.58215	0.787069	Down	0.999367	0.750499	0.52919	1.40791	0.575691	0.47702	108180085	synaptonemal complex central element protein 1-like	protein_coding	GO:0000795,GO:0007130,GO:0070193	synaptonemal complex|synaptonemal complex assembly|synaptonemal complex organization
LOC108180146	2054.15	1676.33	2431.98	1.4507	0.536752	0.300828	0.569401	Up	15.3707	9.15283	42.9754	14.2304	9.90106	15.7594	108180146		protein_coding
LOC108180164	2.38347	0	4.76694	23.4778	4.55323	0.0170103	0.100356	Up	0.119157	0.0980063	0.10078	0	0	0	108180164		protein_coding
LOC108180169	2.17788	3.15384	1.20193	0.378983	-1.3998	0.456601	0.702765	Down	0	0	0.0224836	0.0267841	0.0133414	0.0110548	108180169		protein_coding
LOC108180196	7.95086	15.2935	0.60817	0.039176	-4.67389	0.0120147	0.0790597	Down	0	0.0256719	0	0.301897	0	0.31151	108180196		protein_coding
LOC108180198	2.62496	1.65552	3.59441	2.08731	1.06164	0.472177	0.714063	Up	0.0898702	0.147836	0.121615	0.0289753	0	0.119592	108180198		protein_coding
LOC108180286	171.312	204.819	137.804	0.672639	-0.572095	0.381635	0.640223	Down	0.316511	1.11421	0.985121	1.83686	0.991203	0.321155	108180286		protein_coding
LOC108180310	6.37412	0.5956	12.1526	17.6616	4.14254	0.00347048	0.0343856	Up	0.299434	0.118216	0.197537	0.0289625	0	0	108180310		protein_coding
LOC108180325	3.05495	4.30341	1.80649	0.414053	-1.27211	0.440243	0.690035	Down	0	0.0199534	0.10259	0.19554	0.0487003	0.0201766	108180325		protein_coding
LOC108180720	1.79665	0.2978	3.2955	8.32968	3.05826	0.236123	0.499364	Up	0.0703359	0	0.713856	0.0680317	0	0	108180720		protein_coding
LOC108180723	1.45253	0.492987	2.41207	6.08895	2.60619	0.225246	0.488161	Up	0.0595436	0.293846	0.120864	0	0.0717191	0	108180723		protein_coding
LOC108180725	390.638	425.48	355.797	0.835454	-0.259368	0.69133	0.853246	Down	24.6806	13.9608	31.193	27.4191	4.06647	43.1063	108180725		protein_coding
LOC108180727	5.72313	6.05516	5.3911	0.872395	-0.196947	0.852055	0.933768	Down	0.100855	0.149315	0.20472	0.121939	0.0303695	0.301971	108180727		protein_coding
LOC108180740	1.35926	0.339431	2.37908	6.01678	2.58899	0.309056	0.576765	Up	0.116418	0.114904	0	0	0	0.0290474	108180740		protein_coding
LOC108180795	5.29848	3.38134	7.21561	2.07453	1.05279	0.308964	0.576728	Up	0.0707412	0.209463	0.143594	0.0684237	0.0213016	0.0882529	108180795		protein_coding
LOC108181079	24.0918	25.7023	22.4813	0.864313	-0.210374	0.707333	0.861983	Down	0.445952	0.802631	0.718848	0.786567	0.315965	0.890155	108181079		protein_coding
LOC108181080	54.9199	72.166	37.6738	0.526611	-0.925191	0.0386509	0.171025	Down	0.976228	1.23118	1.21097	1.46883	2.41702	1.5156	108181080		protein_coding
LOC108181082	1.32814	0.2978	2.35847	5.97321	2.57851	0.235672	0.499025	Up	0.19139	0.0377802	0.0776986	0.0370241	0	0	108181082		protein_coding
LOC108181095	26.8772	33.5523	20.2021	0.59902	-0.739323	0.502311	0.73526	Down	0.293656	0.20832	0.121078	0.372797	0	0.567841	108181095		protein_coding
LOC108181096	3.87275	3.20844	4.53707	1.40433	0.489878	0.765613	0.890302	Up	0.010069	0.109318	0.0306577	0	0.0121279	0.0803936	108181096		protein_coding
LOC108181097	12.4483	7.02817	17.8684	2.51407	1.33003	0.0375333	0.168222	Up	0.287596	0.222148	0.241125	0.108851	0.060244	0.0873573	108181097		protein_coding
LOC108181106	44.567	35.77	53.364	1.47366	0.5594	0.38286	0.641168	Up	3.60766	3.45445	2.56851	4.11445	0.583704	1.23602	108181106		protein_coding
LOC108181107	126.833	191.292	62.3746	0.326	-1.61705	0.0336008	0.157228	Down	1.14668	2.43051	0.305257	1.47276	2.37739	6.37878	108181107		protein_coding
LOC108181108	6.0079	9.01874	2.99705	0.338871	-1.56119	0.173193	0.420817	Down	0.0482303	0.0952061	0.0163167	0.108851	0.23237	0.0481357	108181108		protein_coding
LOC108181150	7.3745	6.32064	8.42835	1.31928	0.399752	0.659432	0.835531	Up	0.0456541	0.168976	0.104255	0.0662378	0.0412421	0.10252	108181150		protein_coding
LOC108181160	3.83088	3.13449	4.52727	1.47461	0.560329	0.671582	0.841746	Up	0.0420701	0.228376	0.0426979	0.0203459	0.0760088	0.083975	108181160		protein_coding
LOC108181161	67.1334	69.1679	65.0988	0.947186	-0.0782802	0.823396	0.918633	Down	0.575677	0.559448	0.799998	0.591083	0.618718	0.521512	108181161		protein_coding	GO:0000978,GO:0001228,GO:0046872	RNA polymerase II cis-regulatory region sequence-specific DNA binding|DNA-binding transcription activator activity, RNA polymerase II-specific|metal ion binding
LOC108181166	8.31562	5.90726	10.724	1.83172	0.873199	0.341068	0.6066	Up	0.164034	0.058873	0.31783	0.100966	0.0898072	0.0595318	108181166		protein_coding
LOC108181194	4.62361	5.35695	3.89027	0.723013	-0.467906	0.740751	0.878706	Down	0.0112744	0.00556389	0.0572134	0.00545253	0.0135798	0.0675137	108181194		protein_coding
LOC108181220	11.5532	12.9526	10.1539	0.771847	-0.373614	0.744838	0.880538	Down	0.126192	0.172455	0.0295558	0.328618	0.011692	0.0581282	108181220		protein_coding
LOC108181226	9.09086	9.22762	8.95409	0.976401	-0.0344537	0.966013	0.984325	Down	0.162021	0.0999464	0.349434	0.156714	0.170758	0.202129	108181226		protein_coding
LOC108181236	24.9434	34.464	15.4228	0.45222	-1.1449	0.208626	0.467721	Down	0.747875	0.527249	0.108434	0.439192	1.60857	0.373204	108181236		protein_coding
LOC108181449	1.69048	1.28378	2.09718	1.7363	0.796015	0.669907	0.841074	Up	0.014698	0.0145068	0.0745866	0.0142165	0.0354068	0	108181449		protein_coding
LOC108181524	22.1308	24.8856	19.376	0.77002	-0.377032	0.510599	0.740991	Down	0.281344	0.185123	0.407918	0.49242	0.177505	0.320905	108181524		protein_coding
LOC108181540	1.23283	2.46566	0	0.0658975	-3.92363	0.2019	0.45883	Down	0	0	0	0.269507	0	0.0926959	108181540		protein_coding
LOC108181585	2.66573	1.76745	3.564	2.00003	1.00002	0.439639	0.689777	Up	0.257719	0.101747	0.261566	0.0997106	0.0620835	0.102885	108181585		protein_coding
LOC108181587	2.26282	3.01963	1.50601	0.485978	-1.04104	0.61243	0.807296	Down	0	0.111074	0.456868	0.979656	0	0.112317	108181587		protein_coding
LOC108181592	2.48326	3.47392	1.49261	0.434689	-1.20194	0.466533	0.709361	Down	0.0276278	0	0.112161	0.0267228	0.0998316	0.137868	108181592		protein_coding
LOC108181664	7.65592	6.41394	8.8979	1.3565	0.439886	0.709661	0.863535	Up	0.109861	0.0250229	0.120078	0.0735662	0	0.0927771	108181664		protein_coding			dre00531,dre04142	Glycosaminoglycan degradation|Lysosome
LOC108181672	284.411	388.297	180.525	0.464649	-1.10579	0.181817	0.432935	Down	0.588752	8.82537	1.4565	9.48514	3.10249	8.68541	108181672		protein_coding
LOC108182771	1.85203	3.39997	0.304085	0.0967813	-3.36913	0.107024	0.318229	Down	0	0.0301285	0	0.059051	0.183837	0.0304656	108182771		protein_coding
LOC108182773	1.92337	0.5956	3.25113	4.96667	2.31228	0.328209	0.594559	Up	0.299529	0.168934	0	0.0827762	0	0	108182773		protein_coding
LOC108182775	200.008	126.155	273.861	2.17516	1.12112	0.0347501	0.160802	Up	7.8057	16.7863	4.21873	3.86706	4.31872	3.07182	108182775		protein_coding
LOC108182795	31.9748	35.4958	28.4537	0.807905	-0.307742	0.702913	0.859057	Down	0.366277	0.581566	0.565697	0.600733	0.863166	0.0794693	108182795		protein_coding
LOC108182798	29.4465	10.1597	48.7333	4.70711	2.23484	0.00056676	0.00947438	Up	0.437253	0.183089	0.470674	0.121752	0.0398987	0.0396723	108182798		protein_coding
LOC108182859	6.98286	3.90665	10.0591	2.49046	1.31641	0.240023	0.502832	Up	0.246338	0.102372	0.0921104	0.0501616	0	0.103518	108182859		protein_coding
LOC108182861	126.673	129.353	123.992	0.957186	-0.0631293	0.863663	0.939573	Down	0.667438	1.01558	1.19956	0.81369	0.628059	1.15185	108182861		protein_coding
LOC108182910	1.25009	2.20949	0.290685	0.1423	-2.81299	0.268985	0.535616	Down	0.0327461	0	0	0.126693	0	0.0980455	108182910		protein_coding
LOC108183284	6.32721	9.0224	3.63202	0.405639	-1.30173	0.287111	0.555694	Down	0.0170684	0.168464	0.0173231	0.0660368	0.185027	0.170349	108183284	gastrula zinc finger protein XlCGF8.2DB-like	protein_coding	GO:0046872	metal ion binding
LOC108183289	57.9574	80.4301	35.4848	0.440658	-1.18227	0.13472	0.364632	Down	0.573034	1.72031	0.508887	3.64889	1.61048	0.405102	108183289		protein_coding
LOC108183308	6.07252	7.75797	4.38707	0.569089	-0.813274	0.535801	0.755964	Down	0.363024	0.0551235	0	0.189071	0.20181	0.222961	108183308		protein_coding
LOC108183311	2.26601	2.42403	2.10799	0.83328	-0.263127	0.876135	0.945184	Down	0.0199417	0.0787292	0.0404785	0.135019	0	0.0199025	108183311		protein_coding
LOC108183315	3.47856	2.29276	4.66436	1.99723	0.998002	0.610743	0.806162	Up	0.230504	0.0151671	0	0.0297271	0	0.0766841	108183315		protein_coding
LOC108183316	3.92789	4.02789	3.82789	0.956242	-0.0645527	0.961501	0.982516	Down	0.0971197	0	0.0616057	0.046969	0.043867	0.0484645	108183316		protein_coding
LOC108183319	21.5516	17.0343	26.0689	1.51052	0.595043	0.345563	0.61129	Up	0.081516	0.150855	0.0620494	0.0919865	0.0327281	0.0474577	108183319		protein_coding
LOC108183320	4.07363	4.87034	3.27692	0.653293	-0.614198	0.578401	0.784425	Down	0.0667878	0.0494394	0.0677845	0.14535	0.0201111	0.0833209	108183320		protein_coding
LOC108183322	4.58425	8.27324	0.895251	0.109617	-3.18946	0.0199354	0.111571	Down	0.0113141	0.0111669	0.0114829	0.0218869	0.109021	0.124211	108183322		protein_coding
LOC108183334	1.8723	1.62321	2.12139	1.35202	0.435112	0.807348	0.911254	Up	0	0.0730108	0.0300307	0.0143099	0.0356395	0.0147655	108183334		protein_coding
LOC108183335	2.64289	3.22779	2.05799	0.623755	-0.680949	0.670269	0.841188	Down	0.0432171	0.00853101	0.00877242	0.0334411	0	0.0517588	108183335		protein_coding
LOC108183344	62.4835	55.4333	69.5337	1.24415	0.315164	0.522262	0.747706	Up	1.5519	1.04041	0.83211	1.01959	0.317418	1.08128	108183344		protein_coding
LOC108183347	5.78258	6.50652	5.05864	0.768243	-0.380366	0.731257	0.873368	Down	0.31479	0.310696	0.039936	0.228358	0.0947896	0.431987	108183347		protein_coding
LOC108183349	3.8731	3.27873	4.46747	1.36447	0.448336	0.75298	0.884439	Up	0.116705	0.131643	0	0.0322521	0.0401627	0.0831975	108183349		protein_coding
LOC108183350	10.6899	8.9112	12.4685	1.37997	0.464634	0.573919	0.780964	Up	0.276948	0.195247	0.0803088	0.114803	0.047654	0.184269	108183350		protein_coding
LOC108183378	2.24889	0.2978	4.19999	10.6123	3.40766	0.0862973	0.280018	Up	0.081895	0.181867	0.0207793	0.019803	0	0	108183378		protein_coding
LOC108183407	23.3305	27.6082	19.0528	0.699798	-0.51499	0.382441	0.640885	Down	0.321535	0.282092	0.157124	0.218853	0.401627	0.285248	108183407		protein_coding
LOC108183426	6.82913	5.3763	8.28196	1.50878	0.593384	0.560131	0.772086	Up	0.168123	0.0725973	0.0533226	0.0508173	0.0126563	0.104871	108183426		protein_coding
LOC108183427	8.96627	9.88147	8.05107	0.810104	-0.303821	0.773726	0.893849	Down	0.181805	0.179441	0.129163	0.0351699	0.0656942	0.417331	108183427		protein_coding
LOC108183428	7.53081	7.00954	8.05208	1.12352	0.168032	0.887077	0.95033	Up	0.199986	0.233273	0.0553555	0.193434	0	0.199593	108183428		protein_coding
LOC108183429	3.38236	3.4646	3.30012	0.937072	-0.0937679	0.940153	0.974907	Down	0.0561751	0.110889	0.142534	0.0543348	0.0338309	0.196227	108183429		protein_coding
LOC108183430	6.16539	5.43728	6.89351	1.23314	0.302336	0.79873	0.906442	Up	0.0561051	0.0830631	0.185063	0.108534	0	0.125989	108183430		protein_coding
LOC108183436	4.94771	3.68846	6.20697	1.70323	0.768273	0.448968	0.696935	Up	0.162054	0.0533154	0.0685302	0.0522483	0.0487977	0.040434	108183436		protein_coding
LOC108183447	11.1952	12.8818	9.50866	0.733685	-0.446766	0.646635	0.827561	Down	0.184572	0.0455428	0.265379	0.10414	0.0741043	0.39912	108183447		protein_coding
LOC108183450	14.5301	18.0786	10.9817	0.602882	-0.730053	0.383071	0.641399	Down	0.496489	0.0980063	0.638271	0.640298	0.239204	0.891926	108183450		protein_coding
LOC108183461	2.98614	0.5956	5.37669	8.01756	3.00316	0.0948022	0.296527	Up	0.0790661	0.0390189	0.240738	0.038238	0	0	108183461		protein_coding
LOC108183462	24.2035	20.3326	28.0744	1.37402	0.458399	0.526551	0.749552	Up	0.594039	0.173722	0.279123	0.148965	0.106001	0.395249	108183462		protein_coding
LOC108183464	32.7344	32.7002	32.7686	1.00281	0.00404393	0.992906	0.99677	Up	0.466795	0.407152	0.319514	0.472503	0.313811	0.238357	108183464		protein_coding
LOC108183465	6.66858	6.70809	6.62906	0.973651	-0.0385228	0.972305	0.986663	Down	0.0741597	0.292781	0.0376333	0.233123	0.066993	0.0740142	108183465		protein_coding
LOC108183482	5.0211	2.90698	7.13521	2.61416	1.38635	0.199927	0.45632	Up	0.151328	0.0896158	0.122869	0.0292741	0.0729085	0.0151031	108183482		protein_coding
LOC108183483	2.74801	3.69211	1.8039	0.480315	-1.05795	0.535138	0.755464	Down	0.0148076	0.0438449	0.0300571	0.0143225	0	0.147785	108183483		protein_coding
LOC108183484	22.21	28.9162	15.5038	0.533	-0.907793	0.143829	0.379113	Down	0.235486	0.22019	0.188684	0.635362	0.253781	0.173175	108183484		protein_coding
LOC108183485	4.20649	4.7964	3.61659	0.748306	-0.418301	0.782215	0.898838	Down	0	0.0445483	0.137427	0.145522	0.0543646	0.0150156	108183485		protein_coding
LOC108183489	17.9417	23.7879	12.0954	0.506589	-0.981113	0.277018	0.54483	Down	0.449401	0.0554445	0.266063	0.307897	0.157877	0.840973	108183489		protein_coding
LOC108183493	34.2195	26.8462	41.5928	1.53007	0.613596	0.35417	0.617671	Up	2.05476	1.40402	0.962502	1.03959	0.190378	1.32508	108183493		protein_coding
LOC108183495	26.5813	26.8462	26.3163	0.971434	-0.0418127	0.956727	0.980432	Down	0.567783	0.247868	0.155146	0.359081	0.065758	0.457694	108183495		protein_coding
LOC108183496	9.69016	7.54416	11.8362	1.53142	0.614873	0.500356	0.734177	Up	0.327634	0.132289	0.136033	0.144046	0.0179377	0.178359	108183496		protein_coding
LOC108183497	54.5466	42.3752	66.7181	1.56344	0.644724	0.208923	0.467936	Up	1.21364	0.566259	0.705458	0.469552	0.212626	0.69372	108183497		protein_coding
LOC108183498	4.80341	3.94463	5.66219	1.43624	0.522292	0.592376	0.792803	Up	0.0904088	0.0764854	0.0786498	0.0749546	0.0466695	0.0257804	108183498		protein_coding
LOC108183499	31.4011	28.6482	34.154	1.18844	0.249066	0.749026	0.882706	Up	2.5257	0.631101	0.551616	0.649393	0.423591	1.59541	108183499		protein_coding
LOC108183500	17.0611	17.6645	16.4578	0.93645	-0.0947254	0.865856	0.940314	Down	0.184128	0.246638	0.293663	0.190817	0.205937	0.262524	108183500		protein_coding
LOC108183501	50.8741	49.1742	52.574	1.06786	0.0947235	0.817387	0.915365	Up	2.10661	1.01225	1.80046	1.66225	1.06837	1.21722	108183501		protein_coding
LOC108183517	2.78104	1.68419	3.87788	2.25079	1.17043	0.422959	0.676668	Up	0.018361	0.0135916	0.0279525	0.0177595	0.00552885	0	108183517		protein_coding
LOC108183521	55.7147	40.4819	70.9475	1.73351	0.793698	0.0303312	0.14729	Up	0.863038	0.719985	0.865491	0.586323	0.259878	0.379402	108183521		protein_coding
LOC108183522	3.16692	2.16786	4.16598	1.81665	0.861284	0.520033	0.746233	Up	0.109614	0.0901573	0.0556251	0.0883529	0	0.0364664	108183522		protein_coding
LOC108183524	10.9384	10.2689	11.6079	1.11342	0.154993	0.84127	0.929359	Up	0.381626	0.251109	0.3615	0.221475	0.0919323	0.457053	108183524		protein_coding
LOC108183562	4.11565	2.81441	5.41689	1.9127	0.935608	0.476509	0.717972	Up	0.0104492	0.0515663	0.127261	0.0505342	0.0251716	0.0104287	108183562		protein_coding
LOC108183587	499.781	704.191	295.371	0.419152	-1.25445	0.000200488	0.00442412	Down	3.34621	3.49954	4.1271	12.1961	5.55186	5.21957	108183587		protein_coding
LOC108183612	6.61629	5.06553	8.16705	1.59098	0.669915	0.607903	0.803916	Up	0	0.365642	0.300791	0.191106	0.0594948	0.123244	108183612		protein_coding
LOC108183614	9.6489	11.2735	8.02427	0.719993	-0.473945	0.526474	0.749552	Down	0.126014	0.0829167	0.0746052	0.0711	0.113836	0.146728	108183614		protein_coding
LOC108183619	22.5467	22.623	22.4705	1.00986	0.0141514	0.980748	0.990748	Up	0.152603	0.248078	0.273319	0.156287	0.259493	0.143345	108183619		protein_coding
LOC108183629	6.55928	8.97218	4.14639	0.45603	-1.1328	0.290416	0.558712	Down	0.0725463	0.0447517	0.00920362	0.105255	0.0218451	0.117656	108183629		protein_coding
LOC108183630	5.95596	5.89722	6.0147	1.04073	0.0576027	0.967919	0.984813	Up	0.0465031	0.137695	0	0.0179919	0.0896192	0.0371294	108183630		protein_coding
LOC108183671	18.5591	17.95	19.1682	1.0598	0.0837898	0.909346	0.960123	Up	0.232515	0.424559	0.0825949	0.292368	0.126027	0.19725	108183671		protein_coding
LOC108183672	8.61154	10.662	6.56105	0.614642	-0.702182	0.401053	0.657079	Down	0.090756	0.0895757	0.0690828	0.197511	0.109314	0.0452889	108183672		protein_coding
LOC108183673	5.99509	4.23239	7.7578	1.92973	0.948399	0.376426	0.636378	Up	0.14521	0.171985	0.0589507	0.0280905	0.104941	0.0289849	108183673		protein_coding
LOC108183674	10.2249	10.9534	9.49627	0.871423	-0.198555	0.785752	0.900161	Down	0.204172	0.0719701	0.192417	0.155165	0.140526	0.160106	108183674		protein_coding
LOC108183675	3.64005	5.5262	1.75391	0.320899	-1.63981	0.261685	0.528584	Down	0.0728869	0	0.0147949	0.112799	0.0877909	0.0290976	108183675		protein_coding
LOC108183678	9.20615	15.155	3.25733	0.213052	-2.23072	0.0105376	0.0727045	Down	0.0485773	0.0239728	0.0164341	0.195775	0.0585104	0.113125	108183678		protein_coding
LOC108183679	2.1275	3.64683	0.60817	0.165773	-2.59272	0.162563	0.406765	Down	0	0.013119	0	0.032141	0.0240146	0.0132657	108183679		protein_coding
LOC108183680	22.5222	21.8251	23.2193	1.08043	0.111611	0.895698	0.952983	Up	0.460799	0.318364	0.420909	0.0445704	0.518022	0.321926	108183680		protein_coding
LOC108183681	1.85676	1.65552	2.05799	1.21047	0.275563	0.877922	0.945877	Up	0.0760731	0.0150167	0.0154417	0.0147162	0	0.060739	108183681		protein_coding
LOC108183682	8.06858	6.89396	9.2432	1.30108	0.379708	0.645104	0.826531	Up	0.205975	0.184815	0.190045	0.235451	0.0451078	0.11213	108183682		protein_coding
LOC108183683	8.41879	4.32569	12.5119	2.89549	1.53381	0.0646277	0.235693	Up	0.26215	0.147852	0.38009	0.090558	0.0676618	0.0747531	108183683		protein_coding
LOC108183684	3.06601	0.5956	5.53641	8.47378	3.08301	0.198959	0.455227	Up	0.720026	0.0394812	0	0.077382	0	0	108183684		protein_coding
LOC108183686	24.1505	25.4369	22.8642	0.889614	-0.168749	0.78876	0.90145	Down	0.210132	0.0879876	0.19388	0.184771	0.0613576	0.23514	108183686		protein_coding
LOC108183691	24.544	33.1724	15.9156	0.475571	-1.07227	0.11743	0.336516	Down	0.130794	0.306596	0.431425	0.980447	0.275693	0.375295	108183691		protein_coding
LOC108183702	13.8881	10.2875	17.4886	1.71004	0.774028	0.263743	0.530492	Up	0.943051	0.465393	0.446658	0.212837	0.26504	0.439227	108183702		protein_coding
LOC108183709	4.36176	3.95759	4.76593	1.20114	0.264399	0.819268	0.916173	Up	0.0383302	0.0151327	0.070024	0.0148298	0.0184672	0.053557	108183709		protein_coding
LOC108183801	2.70911	1.17185	4.24638	3.70286	1.88864	0.338044	0.604002	Up	0	0.353807	0.0992232	0	0.0392517	0.0650482	108183801		protein_coding
LOC108183819	27.403	36.3041	18.5018	0.504897	-0.985939	0.0824959	0.272564	Down	0.187925	0.217739	0.0995114	0.410956	0.13778	0.33434	108183819		protein_coding
LOC108183829	5.13831	5.83697	4.43966	0.764909	-0.38664	0.687106	0.850885	Down	0.0782415	0.028959	0.0397046	0.047299	0.0471202	0.068327	108183829		protein_coding
LOC108183843	13.6255	17.7125	9.5385	0.539388	-0.890605	0.183735	0.435377	Down	0.186923	0.198684	0.0729665	0.305969	0.225145	0.200907	108183843		protein_coding
LOC108183844	10.7188	12.2149	9.22259	0.755955	-0.403627	0.561741	0.773034	Down	0.147268	0.0847892	0.149466	0.201795	0.133036	0.0979861	108183844		protein_coding
LOC108183846	4.00741	2.30207	5.71275	2.51248	1.32911	0.445221	0.694171	Up	0	0.0147967	0.273877	0.0145005	0.0361143	0.0448867	108183846		protein_coding
LOC108183847	32.6576	44.0395	21.2757	0.482444	-1.05157	0.127975	0.35354	Down	0.238249	0.414971	0.341371	0.243999	0.371367	1.14694	108183847		protein_coding
LOC108183848	2.17147	1.35772	2.98522	2.16175	1.1122	0.642675	0.824691	Up	0.0312894	0	0.127025	0	0	0.0624559	108183848		protein_coding
LOC108183877	23.2755	30.5142	16.0367	0.523302	-0.934284	0.365189	0.626642	Down	0.0375264	0.481498	0.13965	0.822732	0.241065	0.0873897	108183877		protein_coding
LOC108183884	1.82007	1.27446	2.36568	1.78505	0.835966	0.667856	0.840109	Up	0.217534	0.128823	0	0.0841629	0	0.0868427	108183884		protein_coding
LOC108183899	3.0754	3.45164	2.69915	0.770862	-0.375455	0.753905	0.884759	Down	0.0377854	0.0745879	0.0575239	0.109643	0.0455117	0.0377112	108183899		protein_coding
LOC108183900	38.7113	25.1175	52.305	2.05824	1.04141	0.204889	0.462695	Up	0.381103	0.132758	0.4778	0.216834	0.0135009	0.201364	108183900		protein_coding
LOC108183901	3.3958	4.7104	2.08119	0.436423	-1.1962	0.464186	0.707578	Down	0.102307	0.0673175	0.0692224	0.0329851	0	0.442459	108183901		protein_coding
LOC108183921	48.7867	53.7953	43.7782	0.817004	-0.291585	0.604041	0.801136	Down	0.329378	0.606842	0.668587	0.743371	0.674439	0.252027	108183921		protein_coding
LOC108183923	6.76204	3.69849	9.82558	2.52842	1.33824	0.230495	0.493903	Up	0.208219	0.190832	0.0905685	0.12947	0	0.0445308	108183923		protein_coding
LOC108183925	15.6104	22.3906	8.83034	0.395568	-1.338	0.0929032	0.292626	Down	0.139482	0.0393336	0.0202233	0.147761	0.120002	0.159095	108183925		protein_coding
LOC108183929	1.32458	0	2.64916	13.0623	3.70734	0.130882	0.358277	Up	0.181512	0.0298586	0.061407	0	0	0	108183929		protein_coding
LOC108183940	3.46246	0	6.92493	34.0745	5.09062	0.00555183	0.0478494	Up	0.0383215	0.151292	0.103716	0	0	0	108183940		protein_coding
LOC108184001	10.719	17.5699	3.86809	0.218348	-2.1953	0.0251659	0.129824	Down	0.0520364	0.0308158	0.052813	0.130862	0.0376061	0.373927	108184001		protein_coding
LOC108184002	9.67222	11.8855	7.45889	0.619463	-0.69091	0.373727	0.634224	Down	0.0902707	0.0779596	0.114522	0.240112	0.0815469	0.0788318	108184002		protein_coding
LOC108184005	12.2442	11.9631	12.5253	1.02639	0.0375781	0.966613	0.984325	Up	0.274139	0.18732	0.428046	0.367142	0.0253996	0.378832	108184005		protein_coding
LOC108184006	7.35792	6.34931	8.36653	1.30916	0.388646	0.647844	0.828265	Up	0.16044	0.135732	0.348932	0.199523	0.110427	0.114375	108184006		protein_coding
LOC108184007	9.95947	14.6196	5.29933	0.363133	-1.46143	0.178408	0.42871	Down	0.197968	0.0751514	0	0.294589	0.183422	0.167183	108184007		protein_coding
LOC108184008	11.1694	11.9071	10.4317	0.893504	-0.162453	0.814372	0.913892	Down	0.129188	0.0956312	0.152969	0.114543	0.155605	0.0859566	108184008		protein_coding
LOC108184011	1.75657	0.790788	2.72235	3.58276	1.84107	0.381343	0.640223	Up	0	0.061164	0.0503158	0.011988	0.0149283	0	108184011		protein_coding
LOC108184060	20.6123	19.9844	21.2402	1.0843	0.116762	0.867992	0.941401	Up	0.340859	0.496628	0.312998	0.125597	0.469208	0.275392	108184060		protein_coding
LOC108184063	4.28785	2.9393	5.63641	1.93155	0.949761	0.405963	0.660467	Up	0.145774	0.100715	0.0295899	0.0281997	0.0351163	0.0581951	108184063		protein_coding
LOC108184064	11.4872	9.53839	13.436	1.41345	0.499219	0.495389	0.730509	Up	0.280875	0.314185	0.247058	0.090558	0.135324	0.280324	108184064		protein_coding
LOC108184065	1.76745	3.5349	0	0.0464415	-4.42844	0.0368125	0.166339	Down	0	0	0	0.124046	0.0772359	0.127996	108184065		protein_coding
LOC108184066	7.09563	14.1913	0	0.011512	-6.44072	2.81303e-05	0.000926997	Down	0	0	0	0.678198	0.211136	0.594823	108184066		protein_coding
LOC108185170	15.196	9.63735	20.7547	2.16886	1.11693	0.15513	0.396896	Up	0.212144	0.747804	1.13807	0.293135	0.292027	0.241975	108185170		protein_coding
LOC108185504	3.42097	6.23738	0.604566	0.0953098	-3.39123	0.0231965	0.123542	Down	0	0.0132388	0.0136135	0.103791	0.0484681	0.0937087	108185504		protein_coding
LOC108186460	5.27284	0	10.5457	51.9163	5.69812	0.0134003	0.0855475	Up	0	0.196591	0.682269	0	0	0	108186460		protein_coding
LOC108186899	2.22137	3.86136	0.58137	0.151733	-2.7204	0.238933	0.501729	Down	0.0830534	0	0	0.321331	0.150054	0	108186899		protein_coding
LOC108187081	84.8919	64.7973	104.987	1.61374	0.690408	0.0575014	0.218985	Up	4.40213	4.37909	3.41244	2.04514	1.41951	3.04431	108187081		protein_coding
LOC108189345	1.36168	0	2.72337	13.401	3.74427	0.236659	0.49967	Up	0.0118005	0.0931762	0	0	0	0	108189345		protein_coding
LOC108190117	6.37507	3.25645	9.49368	2.79861	1.48471	0.134477	0.364167	Up	0.0970894	0.0447191	0.0656923	0.0438241	0.00779615	0.0129199	108190117		protein_coding
LOC108190430	35.2529	28.9924	41.5135	1.43572	0.521774	0.212406	0.472582	Up	0.474174	0.540809	0.449168	0.377105	0.279221	0.220847	108190430		protein_coding
LOC108190593	5.63823	6.8832	4.39327	0.656237	-0.607711	0.644787	0.82631	Down	0.898303	0.073885	0.151952	0.144812	0.901657	0.298847	108190593		protein_coding
LOC108190663	56.6199	59.6522	53.5877	0.895155	-0.15979	0.718433	0.867058	Down	0.349337	0.283392	0.228272	0.24069	0.167155	0.420292	108190663		protein_coding
LOC108190699	2727.7	3022.98	2432.42	0.80466	-0.313548	0.291692	0.559687	Down	15.669	16.7987	25.8639	26.958	19.0366	16.2232	108190699		protein_coding
LOC108190717	2646.44	2427.76	2865.12	1.18013	0.23894	0.411745	0.665765	Up	52.3662	65.9725	99.5023	56.7516	44.1354	57.4717	108190717		protein_coding
LOC108190731	186.985	193.46	180.51	0.929593	-0.105328	0.718088	0.867058	Down	2.56325	3.07503	2.91771	3.80795	1.77396	2.47341	108190731		protein_coding
LOC108190743	109.329	128.949	89.7086	0.697517	-0.5197	0.105169	0.314886	Down	1.24886	1.6758	1.28174	2.00872	1.75774	1.38645	108190743		protein_coding
LOC108190746	2.35732	3.21482	1.49982	0.453401	-1.14114	0.44694	0.695287	Down	0.0187354	0.0369835	0.0380301	0.144973	0.0225664	0.0186987	108190746		protein_coding
LOC108190752	2.91304	2.20949	3.61659	1.58577	0.665188	0.712083	0.864582	Up	0	0.0487403	0.150359	0.0636864	0	0.0492857	108190752		protein_coding
LOC108190761	17.1855	8.14907	26.222	3.13805	1.64987	0.0099382	0.0698642	Up	0.743639	0.712997	0.409715	0.226059	0.0767742	0.212051	108190761		protein_coding			dre04060,dre05168	Cytokine-cytokine receptor interaction|Herpes simplex virus 1 infection
LOC108190784	2.16611	2.869	1.46322	0.510151	-0.971002	0.64061	0.823917	Down	0.107264	0	0.0272161	0	0.0322992	0.187343	108190784		protein_coding
LOC108190923	72.1154	59.9178	84.3129	1.40983	0.495518	0.345382	0.611193	Up	1.2172	2.55027	2.23232	1.77631	1.31177	0.575436	108190923		protein_coding
LOC108190967	80.4117	114.269	46.5541	0.408839	-1.2904	0.000189553	0.00424226	Down	0.260723	0.267043	0.239651	0.432992	0.521419	0.633346	108190967		protein_coding
LOC108190994	12.9041	11.1523	14.6559	1.3106	0.390232	0.588442	0.790553	Up	0.60504	0.875851	0.491256	0.273102	0.291503	0.724623	108190994		protein_coding
LOC108191006	1.51012	0	3.02024	14.8566	3.89304	0.105287	0.314953	Up	0.0264794	0.182945	0.0537491	0	0	0	108191006		protein_coding
LOC108191314	4.49108	2.71179	6.27036	2.39641	1.26088	0.237291	0.50031	Up	0.140254	0.158206	0.122012	0.0581398	0.0724001	0.019997	108191314		protein_coding
LOC108191474	15.2572	30.5144	0	0.00536765	-7.54149	3.47068e-08	3.03729e-06	Down	0	0	0	0.294523	0.114613	0.164613	108191474		protein_coding
LOC108191513	1.1912	2.3824	0	0.0684678	-3.86843	0.327185	0.593769	Down	0	0	0	0.188622	0	0	108191513		protein_coding	GO:0002025,GO:0004930,GO:0004941,GO:0005886,GO:0007165,GO:0007186,GO:0016020,GO:0045986,GO:0051380,GO:0071880	norepinephrine-epinephrine-mediated vasodilation involved in regulation of systemic arterial blood pressure|G protein-coupled receptor activity|beta2-adrenergic receptor activity|plasma membrane|signal transduction|G protein-coupled receptor signaling pathway|membrane|negative regulation of smooth muscle contraction|norepinephrine binding|adenylate cyclase-activating adrenergic receptor signaling…
LOC108191518	2.3161	1.31609	3.31611	2.43982	1.28677	0.510721	0.741032	Up	0	0.0906314	0.248523	0.0296058	0	0.0916454	108191518		protein_coding	GO:0001594,GO:0004930,GO:0007165,GO:0007186,GO:0016020	trace-amine receptor activity|G protein-coupled receptor activity|signal transduction|G protein-coupled receptor signaling pathway|membrane
LOC108191529	1.1846	0.2978	2.07139	5.2437	2.39059	0.280176	0.548196	Up	0.0124984	0.00616791	0.00317122	0.00302223	0	0	108191529		protein_coding
LOC108191642	3.60008	4.84168	2.35847	0.478382	-1.06376	0.4677	0.710082	Down	0.126636	0.0249979	0.0514105	0.146985	0	0.227498	108191642		protein_coding
LOC108191643	538.267	296.237	780.297	2.63441	1.39748	3.6082e-09	4.03764e-07	Up	7.55861	7.21517	6.88999	2.16207	1.91457	2.94976	108191643		protein_coding
LOC108191691	11.3099	7.7041	14.9157	1.88696	0.916062	0.327985	0.594443	Up	0.202509	0.114215	0.411064	0.25184	0.0348455	0.0577463	108191691		protein_coding
LOC108191765	6.84879	4.61417	9.08341	1.9321	0.950173	0.446364	0.694978	Up	0.231572	0.00952333	0.0587569	0.0653291	0.0116218	0.0577793	108191765		protein_coding
LOC108191777	2.79704	2.26975	3.32433	1.54566	0.628227	0.714504	0.865814	Up	0.00980291	0.0774034	0.0198984	0.00948177	0.0472296	0	108191777		protein_coding
LOC108191949	105.747	120.084	91.4094	0.764066	-0.38823	0.174537	0.423228	Down	4.1689	3.33896	2.98259	3.99927	3.78659	3.88788	108191949		protein_coding
LOC108191962	1.49034	2.6802	0.300481	0.118076	-3.08221	0.333417	0.599607	Down	0	0	0.0159818	0.137079	0	0	108191962		protein_coding
LOC108192008	3.77578	5.13948	2.41207	0.458644	-1.12455	0.440138	0.689923	Down	0.0352046	0.173734	0.07146	0.238359	0	0.31622	108192008		protein_coding
LOC108192014	2.17788	3.47392	0.881851	0.258659	-1.95088	0.248204	0.512525	Down	0.0414757	0	0.0210473	0.0200585	0.074935	0.103486	108192014		protein_coding
LOC108192158	230.205	149.593	310.818	2.07308	1.05178	0.126918	0.351694	Up	10.0862	28.4488	4.79711	9.95984	1.98241	7.16018	108192158		protein_coding
LOC110437702	74.0894	77.0314	71.1474	0.921033	-0.118675	0.77796	0.896465	Down	2.04107	1.04028	0.933885	1.65056	0.866493	1.25229	110437702		protein_coding
LOC110437703	4.20848	2.11619	6.30077	3.20217	1.67905	0.168759	0.414917	Up	0.0866561	0.188164	0.0879494	0.0167635	0.0626253	0.0172972	110437703		protein_coding
LOC110437704	256.676	285.303	228.05	0.79985	-0.322198	0.343519	0.609214	Down	2.07505	3.55468	3.4495	4.02567	3.21755	2.48755	110437704		protein_coding	GO:0008270,GO:0046872	zinc ion binding|metal ion binding
LOC110437705	158.058	188.832	127.284	0.674669	-0.567748	0.541496	0.759504	Down	6.91283	0.173956	1.4509	1.96992	4.17497	4.06529	110437705		protein_coding
LOC110437708	61.3913	38.5976	84.185	2.15247	1.10599	0.0399147	0.174243	Up	0.757969	0.561084	0.46798	0.366569	0.0684719	0.302593	110437708		protein_coding
LOC110437709	136.232	148.994	123.471	0.826102	-0.275608	0.362556	0.623628	Down	0.839942	0.975747	1.25986	1.43073	0.778915	1.02376	110437709		protein_coding
LOC110437710	22.4298	22.4974	22.3622	1.00425	0.00611738	0.994747	0.997152	Up	0.0436192	0.495096	0.265621	0.158213	0.380903	0.119717	110437710		protein_coding
LOC110437711	8.45982	11.5713	5.34831	0.466713	-1.09939	0.161322	0.404945	Down	0.0701897	0.043298	0.0445232	0.0678903	0.0951098	0.122591	110437711		protein_coding
LOC110437713	1130.59	1179.28	1081.9	0.917856	-0.123661	0.585476	0.788794	Down	19.6664	22.1438	18.2433	17.2418	17.3564	21.0014	110437713		protein_coding	GO:0003674	molecular_function
LOC110437714	563.496	629.012	497.98	0.792474	-0.335564	0.286193	0.55467	Down	2.3466	2.79451	4.05322	3.26073	3.59606	2.90825	110437714		protein_coding
LOC110437715	5.48877	1.96264	9.0149	4.79345	2.26106	0.0481276	0.196011	Up	0.0577115	0.156643	0.219648	0.0139552	0.0347562	0.0287991	110437715		protein_coding
LOC110437716	20.1309	14.182	26.0798	1.8006	0.84848	0.230633	0.493977	Up	0.439801	0.740492	1.07653	0.525486	0.0934821	0.490578	110437716		protein_coding
LOC110437717	46.0775	43.377	48.778	1.12042	0.164039	0.763597	0.889018	Up	1.50097	1.12673	0.83678	0.633883	0.483801	1.54022	110437717		protein_coding
LOC110437721	577.05	686.625	467.475	0.681895	-0.552378	0.0906578	0.287828	Down	5.77394	5.40853	5.90434	5.62694	8.85727	6.24102	110437721		protein_coding	GO:0004896,GO:0009897,GO:0016020,GO:0019221,GO:0019955,GO:0043235	cytokine receptor activity|external side of plasma membrane|membrane|cytokine-mediated signaling pathway|cytokine binding|receptor complex
LOC110437722	7.41896	5.59011	9.24782	1.7057	0.770366	0.417704	0.671519	Up	0.12956	0.149188	0.0547891	0.020886	0.0780263	0.064653	110437722		protein_coding
LOC110437723	20.7101	23.3349	18.0854	0.777195	-0.363652	0.596637	0.795697	Down	0.386847	0.254544	0.0713856	0.272127	0.240035	0.269092	110437723		protein_coding
LOC110437724	8.21935	6.40025	10.0385	1.59459	0.673186	0.448337	0.696322	Up	0.572709	0.141315	0.261566	0.193882	0.206945	0.114317	110437724		protein_coding
LOC110437725	24.3728	25.8557	22.89	0.896554	-0.157537	0.84408	0.930906	Down	0.16247	0.673499	0.395747	0.282865	0.665352	0.178366	110437725		protein_coding
LOC110437726	4.36256	4.22307	4.50204	1.08583	0.118794	0.914366	0.96304	Up	0.027437	0.0541603	0.125309	0.0398072	0.0660946	0.0547663	110437726		protein_coding
LOC110437729	17.597	12.7905	22.4035	1.80624	0.852991	0.186199	0.439082	Up	0.292305	0.301617	0.404546	0.115662	0.240051	0.106084	110437729		protein_coding
LOC110437731	884.652	965.214	804.091	0.83367	-0.262452	0.487266	0.725022	Down	38.0348	45.8074	31.0554	42.4518	49.1065	23.7571	110437731		protein_coding
LOC110437733	76.2733	38.1008	114.446	3.04082	1.60446	0.0379945	0.169362	Up	0.315057	0.219085	0.846635	0.0588694	0.241487	0.0571707	110437733		protein_coding
LOC110437735	2.84265	1.7868	3.89849	2.06929	1.04914	0.542546	0.760116	Up	0.0762678	0.150552	0.103208	0.147539	0	0	110437735		protein_coding
LOC110437744	69.503	65.931	73.0751	1.10005	0.137575	0.679062	0.846659	Up	1.18086	1.05317	1.25624	1.08713	0.565502	1.09335	110437744		protein_coding
LOC110437746	163.48	165.563	161.396	0.97212	-0.0407934	0.884803	0.949163	Down	1.88378	2.16111	2.56988	2.65028	1.47336	1.78242	110437746		protein_coding
LOC110437747	75.0885	49.1163	101.061	2.04265	1.03044	0.0981243	0.302391	Up	0.438753	0.393679	1.10458	0.34722	0.0823589	0.409458	110437747		protein_coding
LOC110437753	89.5051	76.195	102.815	1.3497	0.432638	0.24274	0.506333	Up	0.850367	1.04914	0.91285	0.466616	0.472731	0.840538	110437753		protein_coding
LOC110437757	481.897	589.922	373.872	0.634458	-0.656403	0.0117601	0.0778862	Down	4.46687	3.62582	3.76676	6.30268	5.47125	4.09052	110437757		protein_coding
LOC110437758	78.009	53.1038	102.914	1.92873	0.947652	0.0411933	0.177404	Up	0.12279	0.267511	0.121583	0.0970416	0.0505017	0.0851864	110437758		protein_coding
LOC110437765	439.962	359.538	520.386	1.44492	0.530988	0.261572	0.528564	Up	21.6692	23.6655	14.6501	15.6612	4.02498	17.3976	110437765		protein_coding
LOC110437767	1.67247	0	3.34494	16.4629	4.04114	0.29453	0.562728	Up	0	0.41231	0	0	0	0	110437767		protein_coding
LOC110437770	9.95006	15.3996	4.50047	0.296611	-1.75336	0.0614017	0.228359	Down	0.0208338	0.0462665	0.0105724	0.0503783	0.119196	0.0467841	110437770		protein_coding
LOC110437771	3.63507	3.65614	3.614	1.01354	0.0194007	0.989583	0.995318	Up	0.0195264	0.0963625	0.118907	0.0755471	0.117596	0	110437771		protein_coding
LOC110437773	67.6991	82.1311	53.2672	0.647065	-0.628018	0.153928	0.394857	Down	1.79823	1.2249	1.51661	3.30717	1.58632	1.21332	110437773		protein_coding
LOC110437774	8.45964	8.08737	8.83191	1.11167	0.152729	0.89602	0.953003	Up	0.742434	0.0385673	0.396587	0.0755908	0.423591	0.350989	110437774		protein_coding
LOC110437777	2074.39	1786.13	2362.65	1.32288	0.403681	0.0863799	0.280198	Up	53.0788	42.3359	33.049	30.4312	23.9893	28.6205	110437777		protein_coding	GO:0003995,GO:0005739,GO:0016491,GO:0016627,GO:0050660	acyl-CoA dehydrogenase activity|mitochondrion|oxidoreductase activity|oxidoreductase activity, acting on the CH-CH group of donors|flavin adenine dinucleotide binding	dre00071,dre00280	Fatty acid degradation|Valine, leucine and isoleucine degradation
LOC110437782	363.38	414.393	312.366	0.753775	-0.407794	0.201161	0.457681	Down	3.05977	4.52997	5.96086	5.10394	4.34132	5.95226	110437782		protein_coding
LOC110437786	69.7016	80.5577	58.8454	0.733071	-0.447975	0.195992	0.451442	Down	0.745124	0.420248	0.594192	0.686394	0.641062	0.70825	110437786		protein_coding
LOC110437787	141.618	155.929	127.307	0.817295	-0.291071	0.377787	0.637207	Down	4.17898	2.19439	2.46541	3.54429	2.75231	2.91749	110437787		protein_coding
LOC110437788	690.402	1119.69	261.116	0.233329	-2.09956	0.000103357	0.00260658	Down	1.27357	2.76849	2.7596	4.61753	13.0153	5.87966	110437788		protein_coding			dre04080	Neuroactive ligand-receptor interaction
LOC110437789	1.87109	1.68419	2.05799	1.20565	0.269811	0.88039	0.947031	Up	0.0936251	0.0184815	0.0190045	0.0724464	0.0225539	0	110437789		protein_coding
LOC110437792	61.6856	60.6546	62.7166	1.02935	0.0417323	0.927582	0.969579	Up	1.23908	0.5899	1.25757	0.916489	0.491629	1.17845	110437792		protein_coding
LOC110437794	13.9864	12.3856	15.5873	1.24241	0.313145	0.794736	0.904396	Up	0.687057	0.0753468	0.251807	0.664549	0.0459748	0.0380949	110437794		protein_coding
LOC110437796	94.1369	57.3439	130.93	2.28496	1.19217	0.125725	0.349768	Up	0.458138	3.87251	0.715346	0.863534	0.665011	0.398618	110437796		protein_coding
LOC110437808	27.783	34.9484	20.6176	0.587073	-0.768388	0.140333	0.3737	Down	0.416316	0.489168	0.46277	1.09298	0.525322	0.415499	110437808		protein_coding
LOC110437809	107.128	47.423	166.832	3.50474	1.80931	0.00254211	0.0274274	Up	3.04445	6.5716	4.11985	2.22649	0.864573	0.395249	110437809		protein_coding
LOC110437810	20.5048	20.7769	20.2326	0.976129	-0.0348565	0.97452	0.988076	Down	0.738828	0.221936	1.23889	0.0310706	0.54168	1.2824	110437810		protein_coding
LOC110437812	41.2511	36.1288	46.3733	1.28711	0.364133	0.501088	0.734522	Up	0.637004	0.733506	1.38282	0.855745	0.639382	0.335537	110437812		protein_coding
LOC110437813	5.99033	6.04219	5.93846	0.965002	-0.0513958	0.959165	0.981595	Down	0.224887	0.0554907	0.285305	0.24471	0.0677181	0.19639	110437813		protein_coding
LOC110437814	2.25163	3.01325	1.49002	0.485681	-1.04192	0.549793	0.764656	Down	0.0653654	0.0645153	0.0331705	0.031612	0	0.260948	110437814		protein_coding
LOC110437816	2.10392	1.1912	3.01664	2.38188	1.2521	0.51841	0.745453	Up	0.0168891	0.100016	0.0514233	0.0653431	0	0	110437816		protein_coding
LOC110437818	30.5837	39.3588	21.8086	0.559283	-0.838349	0.384792	0.642722	Down	0.920761	0.227196	0.272563	0.111325	1.36319	0.478622	110437818		protein_coding
LOC110437819	26.1686	26.7506	25.5866	0.964172	-0.0526374	0.923127	0.967293	Down	0.495165	0.281387	0.517783	0.478943	0.433757	0.224633	110437819		protein_coding
LOC110437821	4.53313	5.75736	3.3089	0.568914	-0.813717	0.611512	0.806605	Down	0	0.0502596	0.516819	0.197015	0.0613344	0.609864	110437821		protein_coding
LOC110437822	26.7634	20.5555	32.9713	1.60551	0.683031	0.299691	0.568457	Up	0.276374	0.416347	0.91531	0.422084	0.280326	0.159692	110437822		protein_coding
LOC110437825	11.0696	17.1315	5.00763	0.291014	-1.78084	0.146333	0.383051	Down	0.363379	0.0652097	0.13411	0.255618	0.0397894	1.38472	110437825		protein_coding
LOC110437829	6.30827	9.59371	3.02283	0.312205	-1.67944	0.308979	0.576728	Down	0	0.290769	0.298997	0.341939	0	1.3525	110437829		protein_coding
LOC110437833	6.3836	6.72671	6.04049	0.902716	-0.147656	0.91483	0.963123	Down	0.037264	0.257456	0.0756404	0.198238	0.157093	0	110437833		protein_coding
LOC110437834	36.0447	28.386	43.7034	1.5174	0.601604	0.32882	0.595207	Up	0.661187	0.471871	0.361337	0.560816	0.0980168	0.223347	110437834		protein_coding
LOC110437835	3.93111	3.38134	4.48088	1.30405	0.383003	0.789591	0.901949	Up	0.0622136	0.0921067	0	0.040117	0.0124892	0.0517429	110437835		protein_coding
LOC110437838	3.5425	1.98199	5.10301	2.50867	1.32692	0.375042	0.635297	Up	0.060504	0.119434	0.337738	0.146305	0.0364379	0	110437838		protein_coding
LOC110437839	5.34027	4.40602	6.27453	1.39081	0.475922	0.73717	0.876845	Up	0.115128	0.0284076	0.467384	0.334069	0.0346673	0.0287255	110437839		protein_coding
LOC110437840	7.58049	7.3676	7.79338	1.04659	0.065692	0.933311	0.97249	Up	0.0902707	0.163344	0.137427	0.13097	0.0724861	0.120125	110437840		protein_coding
LOC110437841	3.7225	5.35402	2.09098	0.380685	-1.39333	0.313722	0.581131	Down	0.0318652	0.0314508	0.0485112	0.154107	0	0.111309	110437841		protein_coding
LOC110437842	14.5306	22.7579	6.30336	0.279111	-1.84109	0.00636685	0.0524036	Down	0.046059	0.102285	0.0934927	0.22275	0.291255	0.218351	110437842		protein_coding
LOC110437845	2.65115	1.42802	3.87428	2.70543	1.43586	0.294676	0.562744	Up	0.0853634	0.0421266	0.151615	0.0412835	0.0257046	0.021299	110437845		protein_coding
LOC110437857	232.696	248.805	216.586	0.872671	-0.19649	0.599763	0.798255	Down	1.9103	2.63217	2.30353	2.46972	2.72237	1.40632	110437857		protein_coding
LOC110437860	149.201	176.857	121.545	0.684597	-0.546674	0.0526086	0.207177	Down	2.8024	2.98375	3.20255	5.27179	2.60467	3.5677	110437860		protein_coding
LOC110437879	2.30714	2.82737	1.7869	0.62683	-0.673853	0.650554	0.830135	Down	0.0141438	0.00697992	0.0215323	0.00684022	0.00851796	0.0423481	110437879		protein_coding
LOC110437880	49.8977	63.0138	36.7815	0.580107	-0.78561	0.0659156	0.238568	Down	2.19679	3.08116	1.81887	5.14431	2.29784	3.28872	110437880		protein_coding
LOC110437884	219.688	200.953	238.423	1.1854	0.245373	0.42279	0.676556	Up	8.1856	11.7546	8.02252	6.69415	5.16243	8.4851	110437884		protein_coding
LOC110437886	6.79464	4.58113	9.00814	2.05651	1.0402	0.439709	0.689777	Up	0.248473	0.613103	0.0630452	0.0300416	0.29928	0.0309981	110437886		protein_coding
LOC110437888	2.65002	2.27979	3.02024	1.29309	0.370819	0.824931	0.919829	Up	0.005531	0.0382135	0.0112271	0.0320988	0.00666198	0	110437888		protein_coding
LOC110437890	17.0827	8.82155	25.3438	2.84952	1.51072	0.0762706	0.260095	Up	0.992093	1.03854	0.518706	0.0872357	0.108632	0.570084	110437890		protein_coding
LOC110437901	35.8389	36.3872	35.2905	0.980972	-0.0277165	0.956287	0.980416	Down	1.33068	1.83872	1.31195	1.36063	1.69436	0.796841	110437901		protein_coding
LOC110437906	23.2896	21.0086	25.5706	1.20108	0.26433	0.670091	0.841074	Up	0.749298	0.422602	0.673569	0.476265	0.154717	0.705095	110437906		protein_coding
LOC110437916	48.4085	41.6897	55.1273	1.33766	0.419707	0.378048	0.637436	Up	1.45842	1.16015	1.4139	0.484249	1.02252	0.999335	110437916		protein_coding
LOC110437918	3.16955	4.81867	1.52043	0.315244	-1.66546	0.324078	0.590667	Down	0	0.0455968	0	0.0446842	0.0445153	0.0368856	110437918		protein_coding
LOC110437924	20.5765	21.5085	19.6445	0.925924	-0.111035	0.877783	0.945867	Down	0.472053	0.298185	0.479098	0.438325	0.568578	0.11307	110437924		protein_coding
LOC110437926	4.42646	5.54921	3.30372	0.579161	-0.787964	0.480157	0.720023	Down	0.0194477	0.047987	0.0394759	0.0846477	0.0117122	0.0679334	110437926		protein_coding
LOC110437928	3.88969	4.23239	3.547	0.864668	-0.209782	0.886117	0.949699	Down	0.114574	0	0.116284	0.0369403	0.138002	0.0381165	110437928		protein_coding
LOC110437933	38.4195	50.9557	25.8834	0.508463	-0.975784	0.187128	0.440158	Down	0.454814	1.62294	0.923204	2.67333	1.93842	0.488839	110437933		protein_coding
LOC110437934	14.2693	15.8547	12.684	0.812725	-0.29916	0.720456	0.867676	Down	0.401552	0.0762172	0.188097	0.119507	0.31624	0.23121	110437934		protein_coding
LOC110437935	12.3875	11.0977	13.6772	1.23092	0.299734	0.683105	0.848773	Up	0.261357	0.0910441	0.358878	0.178444	0.129623	0.184126	110437935		protein_coding
LOC110437937	24.7208	26.3361	23.1054	0.874049	-0.194214	0.776196	0.89538	Down	0.592996	1.2486	1.20369	0.573569	0.571401	1.85441	110437937		protein_coding
LOC110437938	79.2076	104.252	54.163	0.516708	-0.952579	0.0112784	0.0759293	Down	3.33528	4.7699	4.21405	8.36131	3.9353	8.55961	110437938		protein_coding
LOC110437942	21.2412	13.3932	29.0892	2.16751	1.11604	0.135487	0.366175	Up	1.31083	0.661268	0.886931	0.704383	0.35086	0.0872174	110437942		protein_coding
LOC110437943	6.70916	10.4311	2.98725	0.289223	-1.78975	0.171878	0.418941	Down	0.0854715	0.12654	0	0.0413357	0.283109	0.277237	110437943		protein_coding
LOC110437957	37.5413	53.9156	21.167	0.393804	-1.34445	0.0123114	0.0803417	Down	0.783795	0.773601	0.500865	0.870431	1.36365	2.17293	110437957		protein_coding
LOC110437964	3.93325	4.64577	3.22073	0.703849	-0.506662	0.720479	0.867676	Down	0.0678088	0.00743632	0.00764675	0.00728748	0.0362997	0.0526366	110437964		protein_coding
LOC110437968	92.1423	87.7409	96.5437	1.09384	0.129401	0.779626	0.897336	Up	4.31135	4.18982	2.22151	4.29843	1.31821	3.07822	110437968		protein_coding
LOC110437969	65.6713	33.5761	97.7666	2.90105	1.53658	0.020919	0.115403	Up	0.349471	0.638962	0.88381	0.0886617	0.0897067	0.377375	110437969		protein_coding
LOC110437974	8.68965	12.8494	4.52986	0.350577	-1.5122	0.142124	0.376174	Down	0.0197781	0.175688	0.100366	0.133911	0.142934	0.454004	110437974		protein_coding
LOC110437975	45.9669	61.0639	30.87	0.502736	-0.992126	0.0653327	0.23745	Down	0.751841	1.23677	1.7078	3.70531	1.3368	1.465	110437975		protein_coding
LOC110437979	2.40482	0.2978	4.51184	11.3978	3.51068	0.0757672	0.258982	Up	0.0176575	0.0697116	0.179211	0.0170791	0	0	110437979		protein_coding
LOC110437982	36.6316	26.6133	46.65	1.74565	0.80376	0.515117	0.743509	Up	1.95075	0.218793	1.3499	0.278738	0	1.48231	110437982		protein_coding
LOC110437994	1.50662	3.01325	0	0.0542695	-4.20372	0.166928	0.412745	Down	0	0	0	0.00442963	0	0.0365654	110437994		protein_coding
LOC110438004	1.48201	2.36305	0.600963	0.250441	-1.99746	0.335937	0.601628	Down	0	0	0.0400293	0.0762972	0.0237528	0.0393633	110438004		protein_coding
LOC110438007	10.5689	20.5296	0.60817	0.029333	-5.09133	0.00208501	0.0239809	Down	0	0.0279197	0	0.519857	0.306646	0.014116	110438007		protein_coding
LOC110438038	2.71143	5.42286	0	0.0306225	-5.02927	0.143029	0.377699	Down	0	0	0	0	0.0731141	0	110438038		protein_coding
LOC110438040	66.767	68.5358	64.9983	0.939745	-0.0896588	0.842164	0.929746	Down	0.542005	0.464567	0.550094	0.758782	0.197568	0.512471	110438040		protein_coding
LOC110438041	248.543	248.549	248.537	1.00318	0.00457343	0.989505	0.995289	Up	5.8922	3.95531	5.46013	4.38943	5.24564	3.08642	110438041		protein_coding
LOC110438057	4.94264	7.49742	2.38786	0.325666	-1.61853	0.325159	0.591456	Down	0.0462483	0.0228234	0.117346	0.0447332	0.389936	0	110438057		protein_coding
LOC110438072	7.59218	7.74866	7.43569	0.952251	-0.0705863	0.928146	0.969751	Down	0.112425	0.0665777	0.102693	0.0869936	0.0541655	0.112204	110438072		protein_coding
LOC110438073	63.4828	53.6277	73.338	1.36993	0.454107	0.152204	0.392646	Up	1.89045	1.53659	2.0541	1.18316	0.991169	1.24303	110438073		protein_coding
LOC110438075	203.06	169.626	236.495	1.39732	0.482661	0.345802	0.611552	Up	17.1421	17.55	11.3234	3.76575	10.3587	13.1068	110438075		protein_coding
LOC110438076	4.43693	7.69772	1.17614	0.15193	-2.71852	0.0453723	0.18881	Down	0.0612726	0.0201586	0	0.197551	0.0492011	0.224225	110438076		protein_coding
LOC110438088	11.5466	9.57417	13.5191	1.3962	0.48151	0.72744	0.870988	Up	0.0190741	0.0376521	0.81307	0.405884	0.0459488	0.11422	110438088		protein_coding
LOC110438102	2.49278	1.66484	3.32072	2.08711	1.06151	0.515726	0.74381	Up	0.0412729	0.285153	0.125667	0	0.0994247	0.0823838	110438102		protein_coding
LOC110438108	807.812	900.009	715.615	0.795296	-0.330436	0.0560569	0.215377	Down	5.03735	4.7676	5.72288	6.13575	4.85235	5.71801	110438108		protein_coding
LOC110438109	6.41265	7.73569	5.08961	0.65443	-0.611689	0.532436	0.753934	Down	0.0243412	0.0240246	0.090583	0.0941751	0.0488641	0.040489	110438109		protein_coding
LOC110438134	4.25471	6.14115	2.36827	0.384206	-1.38005	0.352968	0.616519	Down	0.0755285	0.0186365	0.0574917	0.25569	0.0909725	0	110438134		protein_coding
LOC110438141	6.47478	5.38196	7.5676	1.42012	0.506012	0.760008	0.887495	Up	0.162189	0	0.00658437	0.0439252	0.0468848	0.00647482	110438141		protein_coding
LOC110438147	1.31609	2.63219	0	0.0620032	-4.01151	0.186458	0.43924	Down	0	0	0	0.0180117	0	0.0557556	110438147		protein_coding
LOC110438156	188.942	101.671	276.212	2.70268	1.43439	0.000859342	0.0127427	Up	7.67862	5.7501	5.68299	3.76331	1.19019	1.31493	110438156		protein_coding
LOC110438157	15.2612	1.72582	28.7967	16.3796	4.03383	0.00117517	0.015895	Up	0.1797	0.177363	1.82382	0.0651801	0.0270557	0.0224185	110438157		protein_coding
LOC110438176	71.9655	80.9959	62.9351	0.775058	-0.367624	0.524121	0.748571	Down	1.95152	0.481534	1.03984	2.17072	0.803109	0.941382	110438176		protein_coding
LOC110438182	14.1115	16.2715	11.9516	0.735488	-0.443227	0.604427	0.801423	Down	0.382491	0.553691	0.0776399	0.591937	0.399276	0.203595	110438182		protein_coding
LOC110438202	6.83577	3.36199	10.3095	3.08893	1.62711	0.205496	0.463593	Up	0.277523	0.0595464	0.0857239	0	0.029067	0.0842976	110438202		protein_coding
LOC110438205	4.35441	5.78237	2.92644	0.508895	-0.974559	0.51517	0.743509	Down	0.174364	0	0.0442416	0.210815	0.131261	0.0217527	110438205		protein_coding
LOC110438215	7.33259	5.15811	9.50708	1.8633	0.897861	0.265487	0.532263	Up	0.263026	0.148346	0.190679	0.0908604	0.0905169	0.0937534	110438215		protein_coding
LOC110438216	2.21362	2.36305	2.06418	0.860796	-0.216257	0.891355	0.951772	Down	0.0266466	0	0.0202832	0.0257736	0.00802382	0.0132971	110438216		protein_coding
LOC110438218	44.2053	40.009	48.4015	1.21389	0.279641	0.701571	0.858537	Up	0.10344	0.329844	0.856021	0.277065	0.345022	0.270005	110438218		protein_coding
LOC110438225	16.3377	29.1078	3.56761	0.122325	-3.03121	0.0483181	0.196432	Down	0.166475	0.0985862	0.135168	0.0644087	0	2.7913	110438225		protein_coding
LOC110438229	10.1853	18.6166	1.75391	0.0942113	-3.40796	0.00349971	0.0346359	Down	0.278558	0	0.056543	1.93991	0.335518	0.889636	110438229		protein_coding
LOC110438235	7.3025	9.89425	4.71075	0.47047	-1.08783	0.288374	0.556718	Down	0.453447	0.122059	0.0836754	0.717697	0.148955	0.370274	110438235		protein_coding
LOC110438236	6.80703	4.95999	8.65406	1.71073	0.774614	0.615686	0.809447	Up	0.28733	0.378124	0.0243015	0.347396	0.0288402	0	110438236		protein_coding
LOC110438237	133.465	127.101	139.828	1.09553	0.131631	0.77377	0.893849	Up	9.40637	5.77115	8.77269	7.47529	2.44968	9.28642	110438237		protein_coding
LOC110438240	100.976	114.5	87.4514	0.762524	-0.391146	0.422876	0.67664	Down	1.81268	2.30028	5.3878	3.75707	2.41727	4.58743	110438240		protein_coding
LOC110438249	1.99067	3.39997	0.58137	0.177231	-2.4963	0.220873	0.482844	Down	0.0372846	0	0	0.0360632	0.112271	0.0186057	110438249		protein_coding
LOC110438251	33.0181	38.1813	27.8548	0.733397	-0.447333	0.334848	0.600639	Down	0.381397	0.64747	0.387089	0.545975	0.569637	0.532907	110438251		protein_coding
LOC110438252	23.6992	21.5402	25.8581	1.18286	0.242278	0.71642	0.866727	Up	0.886703	0.656378	0.382473	0.664683	0.133502	0.641598	110438252		protein_coding
LOC110438254	22.7375	19.8561	25.619	1.2675	0.341991	0.595295	0.794452	Up	0.392434	0.328644	0.301735	0.310564	0.0572944	0.34419	110438254		protein_coding
LOC110438255	84.06	103.029	65.0915	0.628594	-0.669799	0.233369	0.49697	Down	0.463582	0.9679	0.497644	1.51764	0.311401	0.952036	110438255		protein_coding
LOC110438256	3.28756	1.77676	4.79836	2.84303	1.50743	0.425951	0.679026	Up	0.184689	0.401032	0	0.0357278	0.133473	0	110438256		protein_coding
LOC110438257	28.9577	45.8644	12.0511	0.261857	-1.93315	0.106862	0.317838	Down	0.891582	0.20533	0.120652	3.59322	0.0357964	0.711866	110438257		protein_coding
LOC110438262	33.17	25.612	40.728	1.58799	0.667205	0.190186	0.444297	Up	0.411292	0.661108	0.52477	0.215959	0.212311	0.433942	110438262		protein_coding
LOC110438269	9.2076	10.9527	7.46249	0.699759	-0.515071	0.53318	0.75435	Down	0.114542	0.113052	0.130783	0.0692435	0.224191	0.128607	110438269		protein_coding
LOC110438280	16.49	14.0786	18.9013	1.34114	0.42346	0.489061	0.726145	Up	0.54266	1.14772	0.747459	0.487391	0.420187	0.657652	110438280		protein_coding
LOC110438288	102.389	92.7142	112.065	1.20354	0.267283	0.591439	0.792165	Up	2.82345	1.33407	1.52425	1.52527	0.560768	2.03849	110438288		protein_coding
LOC110438290	12.5126	11.9201	13.1051	1.12085	0.164594	0.805925	0.910447	Up	0.665825	0.541195	0.516759	0.265182	0.518923	0.508161	110438290		protein_coding
LOC110438291	47.2277	49.6505	44.8049	0.902818	-0.147493	0.744689	0.880538	Down	0.711833	0.669119	1.16969	1.13113	0.755319	0.541285	110438291		protein_coding
LOC110438292	1.57957	0.492987	2.66616	6.74765	2.75439	0.186399	0.43924	Up	0.168806	0.0999664	0.0342651	0	0.0406647	0	110438292		protein_coding
LOC110438293	4.28532	6.47347	2.09718	0.329818	-1.60026	0.314923	0.581777	Down	0.0336602	0.0332225	0.170813	0	0.364888	0.201565	110438293		protein_coding
LOC110438297	3.91369	0.976662	6.85072	6.55672	2.71297	0.0434033	0.182921	Up	0.128431	0.0792253	0.162934	0.0155279	0	0.0320447	110438297		protein_coding
LOC110438298	4.30928	5.35402	3.26453	0.599775	-0.737508	0.652046	0.831125	Down	0.37374	0.3074	0	0.602495	0	0.435175	110438298		protein_coding
LOC110438300	1.49977	0.2978	2.70174	6.82526	2.77088	0.196277	0.451765	Up	0.0108383	0.0213946	0.0660002	0.0104832	0	0	110438300		protein_coding
LOC110438316	2.26908	1.81839	2.71976	1.58522	0.664688	0.714578	0.865814	Up	0.0120619	0.0833351	0.0122419	0	0.0435849	0.0120382	110438316		protein_coding
LOC110438318	8.371	0.339431	16.4026	41.4524	5.37338	0.0108725	0.0740431	Up	0	0.423111	0.0443963	0	0	0.00873153	110438318		protein_coding
LOC110438322	2.79991	0	5.59981	27.5993	4.78656	0.0226329	0.121743	Up	0.407517	0.154699	0.0318153	0	0	0	110438322		protein_coding
LOC110438326	271.18	245.117	297.243	1.21003	0.275039	0.512796	0.742123	Up	4.92622	2.78041	6.77384	5.00238	1.80964	3.70544	110438326		protein_coding
LOC110438330	3.49039	3.10289	3.87788	1.19601	0.258228	0.844549	0.931151	Up	0.0609684	0.0451316	0.0928174	0.103199	0	0.0456365	110438330		protein_coding
LOC110438335	1.33927	0	2.67855	13.1935	3.72175	0.122372	0.344743	Up	0.0246372	0.00810561	0.0416749	0	0	0	110438335		protein_coding
LOC110438339	3.33754	5.46594	1.20913	0.215841	-2.21196	0.136	0.367173	Down	0	0.0432474	0.0444712	0.2331	0.0263885	0.109328	110438339		protein_coding
LOC110438342	13.0639	9.03244	17.0953	1.89638	0.92325	0.251536	0.516646	Up	2.54045	0.725829	0.610665	0.581974	0.483145	0.667227	110438342		protein_coding
LOC110438343	1.2165	0.339431	2.09357	5.29201	2.40382	0.378977	0.638477	Up	0.0295632	0	0.180027	0	0	0.0295052	110438343		protein_coding
LOC110438347	3.49963	6.69878	0.300481	0.0471428	-4.40682	0.01536	0.0939772	Down	0	0	0.0524733	0.700112	0.0622737	0.309602	110438347		protein_coding
LOC110438348	108.964	160.442	57.4873	0.359712	-1.47509	0.00249203	0.0270869	Down	0.951556	1.48391	1.21685	1.65669	3.98854	2.67812	110438348		protein_coding
LOC110438360	6.26578	7.49815	5.03342	0.684048	-0.547831	0.629856	0.817324	Down	0.0398774	0.00491985	0.0404726	0.038571	0.0540355	0.00994979	110438360		protein_coding
LOC110438367	37.9529	29.382	46.5237	1.60941	0.686528	0.125847	0.349958	Up	3.79727	3.54346	3.43352	1.93661	2.41161	1.30921	110438367		protein_coding
LOC110438369	58.1924	60.8097	55.5751	0.912657	-0.131855	0.837034	0.92708	Down	1.66535	0.67242	0.507062	1.6108	0.711177	0.392856	110438369		protein_coding
LOC110438373	35.5296	35.3147	35.7446	1.00747	0.0107314	0.986441	0.993916	Up	1.25174	0.352989	0.562615	0.605367	0.301539	0.945886	110438373		protein_coding			dre00561	Glycerolipid metabolism
LOC110438375	5.32209	4.95361	5.69057	1.12185	0.165881	0.88414	0.948982	Up	0.16128	0.159182	0.709309	0.363991	0.0647527	0.375581	110438375		protein_coding
LOC110438377	9.19327	12.1224	6.26417	0.512552	-0.964228	0.222196	0.484159	Down	0.0904823	0.100469	0.0459164	0.218795	0.0953612	0.0903048	110438377		protein_coding
LOC110438397	4.13019	1.65552	6.60485	3.81797	1.93281	0.149454	0.387556	Up	0.959126	2.27196	0.97344	0.185541	0	0.765795	110438397		protein_coding
LOC110438398	491.899	614.828	368.97	0.599593	-0.737944	0.00426654	0.0398405	Down	2.5744	3.5918	3.63699	6.12525	3.59848	4.48843	110438398		protein_coding
LOC110438400	5.88319	8.16477	3.60161	0.437517	-1.19259	0.323815	0.590513	Down	0.0344385	0.0793115	0.0233017	0.199862	0.0691342	0.011457	110438400		protein_coding
LOC110438587	2.26606	2.12623	2.40588	1.09354	0.129003	0.948152	0.978001	Up	0.0327461	0.0969607	0	0.09502	0	0.0163409	110438587		protein_coding
LOC110438633	49.7736	55.9175	43.6297	0.779356	-0.359646	0.374484	0.634738	Down	1.24972	0.589121	0.908687	1.19074	0.786334	1.0425	110438633		protein_coding
LOC110438659	17.4464	22.0964	12.7964	0.577582	-0.791902	0.194118	0.449486	Down	0.137836	0.0765244	0.15738	0.158318	0.124516	0.266533	110438659		protein_coding
LOC110438722	31.9923	3.12517	60.8593	19.1267	4.25751	4.84081e-05	0.00144505	Up	0.943862	3.60691	0.294753	0.0468175	0.0291503	0.144925	110438722		protein_coding
LOC110438743	18.947	9.49238	28.4016	3.06244	1.61468	0.150777	0.389949	Up	0.491668	3.0734	0.249503	0.11889	0.690905	0.20446	110438743		protein_coding
LOC110438744	1.727	1.32541	2.1286	1.65983	0.731037	0.780394	0.897703	Up	0	0.248144	0	0	0.0865207	0.0358457	110438744		protein_coding
LOC110438754	12.5957	18.3066	6.88473	0.383213	-1.38378	0.0796712	0.267154	Down	0.399541	0.591517	0.540672	0.772904	1.84475	0.664595	110438754		protein_coding
LOC110438781	1.0223	0	2.04459	10.0808	3.33353	0.323887	0.590513	Up	0.0686204	0	0.0116074	0	0	0	110438781		protein_coding
LOC110438837	12.8456	15.541	10.1503	0.658779	-0.602133	0.486681	0.72466	Down	0.0866869	0.111886	0.027071	0.128996	0.128508	0.0332757	110438837		protein_coding
LOC110438861	3.95486	6.74699	1.16274	0.172335	-2.53671	0.26904	0.535673	Down	0.0827988	0	0	0.0200216	0	0.392523	110438861		protein_coding
LOC110438862	5.26573	5.75371	4.77775	0.830166	-0.268529	0.783273	0.899347	Down	0.131452	0.17299	0.0444712	0.148336	0.105554	0.109328	110438862		protein_coding
LOC110438870	1.78471	3.27873	0.290685	0.0978889	-3.35271	0.0904751	0.287426	Down	0.025064	0	0	0.0484858	0.0603782	0.125074	110438870		protein_coding
LOC110438877	14.5809	11.2074	17.9545	1.56629	0.647352	0.506058	0.737892	Up	0.335669	0.540548	0.179304	0.478465	0.0212793	0.123425	110438877		protein_coding
LOC110438920	1.72116	3.44233	0	0.04729	-4.40232	0.111557	0.326586	Down	0	0	0	0.160075	0	0.0943837	110438920		protein_coding
LOC110438921	78.9561	78.5295	79.3826	1.01582	0.0226505	0.953661	0.979845	Up	3.87538	2.30877	3.15366	3.14057	2.85957	1.77709	110438921		protein_coding
LOC110438923	2.20949	4.41899	0	0.0368868	-4.76075	0.0656249	0.237895	Down	0	0	0	0.190409	0	0.147354	110438923		protein_coding
LOC110438926	41.331	41.8274	40.8346	0.983028	-0.0246958	0.963484	0.983364	Down	0.28963	0.695601	0.323348	0.33617	0.45351	0.337239	110438926		protein_coding
LOC110438942	811.296	1000.42	622.176	0.621668	-0.685783	0.0404569	0.17545	Down	3.47144	4.39521	6.96709	9.52272	5.11522	6.1483	110438942		protein_coding			dre04060	Cytokine-cytokine receptor interaction
LOC110438944	1.49429	0.339431	2.64916	6.71012	2.74634	0.19909	0.455425	Up	0.0908374	0.0149427	0.030731	0	0	0.0151099	110438944		protein_coding			dre04080	Neuroactive ligand-receptor interaction
LOC110438948	14.3584	16.0993	12.6175	0.774458	-0.368741	0.593082	0.793281	Down	0.192784	0.499475	0.317949	0.606021	0.232204	0.312659	110438948		protein_coding			dre04210	Apoptosis
LOC110438963	3.16	3.00028	3.31971	1.0836	0.115839	0.937955	0.974189	Up	0	0.0715451	0.128747	0.0876415	0.0218275	0.0542592	110438963		protein_coding
LOC110438964	2.76346	5.52693	0	0.0294915	-5.08356	0.0426418	0.181048	Down	0	0	0	0.255833	0	0.0754224	110438964		protein_coding
LOC110438970	1055.66	1129.06	982.267	0.870053	-0.200825	0.450671	0.698226	Down	13.9332	16.3125	9.75294	13.9008	11.3838	14.149	110438970		protein_coding
LOC110439013	17.3321	8.78558	25.8787	2.97738	1.57404	0.0991527	0.304278	Up	0.299889	0.965859	0.080096	0.0915995	0.152089	0.141774	110439013		protein_coding
LOC110439111	6.22137	5.7853	6.65744	1.17011	0.226642	0.874931	0.944931	Up	0	0.0593002	0.0422157	0.00447026	0.0389669	0.0276755	110439111		protein_coding
LOC110439158	114.989	148.289	81.6887	0.551102	-0.859609	0.239934	0.502741	Down	4.96064	1.14084	0.586563	2.35248	2.58143	5.26334	110439158		protein_coding
LOC110439257	2.84272	3.87433	1.81111	0.46349	-1.10939	0.463517	0.707307	Down	0.044248	0.218363	0	0.171194	0.106592	0.220806	110439257		protein_coding
LOC110439299	2.24779	3.02256	1.47302	0.491225	-1.02554	0.595315	0.794452	Down	0.0493585	0	0.0333968	0	0.0396342	0.0985233	110439299		protein_coding
LOC110439305	126.634	93.4908	159.777	1.71784	0.780596	0.282729	0.550631	Up	4.37732	14.5698	5.67146	1.44133	7.23552	2.78855	110439305		protein_coding
LOC110439308	153.381	176.659	130.103	0.739405	-0.435563	0.199656	0.456109	Down	0.790533	0.988768	1.18966	1.04149	1.32156	1.00663	110439308		protein_coding
LOC110439309	12.1234	10.4511	13.7957	1.30853	0.387947	0.641159	0.82421	Up	0.321535	0.683531	0.125513	0.287079	0.148955	0.320905	110439309		protein_coding
LOC110439310	83.4733	101.335	65.611	0.65034	-0.620733	0.0901789	0.286663	Down	1.3813	1.27481	1.29268	2.08216	1.92304	1.14584	110439310		protein_coding
LOC110439320	1617.59	1717.17	1518.01	0.88352	-0.178666	0.571892	0.779499	Down	60.3109	75.3526	68.9391	95.6665	35.618	73.944	110439320		protein_coding
LOC110439324	16.9017	21.5653	12.2382	0.571832	-0.806337	0.576784	0.783092	Down	0.577495	0	0.0450856	0.0572898	0.552898	0.221677	110439324		protein_coding
LOC110439328	2.95007	3.22779	2.67235	0.80303	-0.316473	0.82067	0.916939	Down	0.0544756	0.0268835	0.0414664	0.0526909	0	0.081553	110439328		protein_coding
LOC110439329	19.6235	18.7185	20.5284	1.08239	0.114223	0.844638	0.931151	Up	0.378021	0.283045	0.238136	0.403462	0.141306	0.182135	110439329		protein_coding
LOC110439330	17.4044	15.3911	19.4177	1.26771	0.342229	0.584034	0.788181	Up	0.378784	0.503896	0.183861	0.270799	0.238037	0.213675	110439330		protein_coding
LOC110439331	10.416	13.3711	7.46092	0.557725	-0.842374	0.333176	0.599484	Down	0.322765	0.414138	0.0655164	0.312191	0.311011	0.61205	110439331		protein_coding
LOC110439334	3.34668	3.74013	2.95324	0.765434	-0.38565	0.785074	0.900113	Down	0.0558037	0.0183593	0.0188788	0.0719674	0	0.0371294	110439334		protein_coding
LOC110439343	1.52583	0.976662	2.07499	2.04511	1.03218	0.618708	0.810785	Up	0.13318	0.0985862	0	0.0322044	0	0.0664595	110439343		protein_coding
LOC110439344	4.65103	5.43655	3.8655	0.724789	-0.464367	0.670876	0.841398	Down	0.23527	0.193508	0.0795937	0.0758542	0.236148	0.273943	110439344		protein_coding
LOC110439347	38.0018	48.0956	27.908	0.577519	-0.79206	0.104842	0.314418	Down	0.537901	1.12427	1.28454	1.98931	1.06712	1.38948	110439347		protein_coding
LOC110439352	20.63	18.9575	22.3025	1.19207	0.253473	0.665484	0.838581	Up	0.483255	0.230262	0.541206	0.241771	0.341214	0.299363	110439352		protein_coding
LOC110439355	8.14037	9.10273	7.178	0.791306	-0.337692	0.659166	0.835377	Down	0.12458	0.143453	0.231806	0.220915	0.175063	0.145058	110439355		protein_coding
LOC110439367	2.9799	2.3824	3.5774	1.44237	0.528445	0.7626	0.888492	Up	0.0349495	0.0258712	0.0443389	0.0676091	0	0	110439367		protein_coding
LOC110439375	1.89448	2.29276	1.49621	0.634307	-0.656747	0.702272	0.858934	Down	0.0196058	0.0193508	0.0596953	0.0379271	0	0.0978367	110439375		protein_coding
LOC110439381	62.1122	31.7323	92.492	2.88549	1.52881	0.0233347	0.123992	Up	4.71383	1.50893	7.06852	2.05379	0.409205	1.61058	110439381		protein_coding
LOC110439383	2.20247	3.80038	0.604566	0.159942	-2.64438	0.130775	0.358166	Down	0	0.0462808	0.0475904	0.226772	0.225915	0.0467986	110439383		protein_coding
LOC110439384	3.99795	5.59722	2.39867	0.418275	-1.25747	0.369869	0.63055	Down	0.10926	0.215677	0.11089	0.845442	0.0658005	0.0545226	110439384		protein_coding
LOC110439385	5.66827	7.71634	3.62019	0.469571	-1.09058	0.358825	0.620644	Down	0	0.159818	0.328682	0.313239	0.292552	0.282812	110439385		protein_coding
LOC110439389	41.9654	55.2529	28.6779	0.519549	-0.944669	0.188778	0.442517	Down	0.471087	4.10715	2.8687	4.63248	4.44475	3.21278	110439389		protein_coding
LOC110439393	13.2437	22.2885	4.19897	0.190787	-2.38996	0.0202836	0.112867	Down	0.0527245	0.104077	0.0891855	0.237987	0.71973	0.0701613	110439393		protein_coding
LOC110439396	5.62116	5.29304	5.94927	1.09294	0.128214	0.894947	0.952808	Up	0.192235	0.118584	0.170716	0.162695	0.0289429	0.191858	110439396		protein_coding
LOC110439407	11.0113	11.9208	10.1019	0.840741	-0.250267	0.709834	0.863561	Down	0.753599	0.446279	0.509897	0.631723	0.363078	0.75212	110439407		protein_coding
LOC110439408	30.0733	36.0934	24.0532	0.662822	-0.593306	0.392347	0.64943	Down	0.443153	0.276246	0.224883	0.293277	0.140465	0.803093	110439408		protein_coding
LOC110439424	14.5724	17.7641	11.3806	0.634785	-0.65566	0.284274	0.552573	Down	0.0459823	0.0705978	0.0777809	0.128486	0.0615386	0.0764868	110439424		protein_coding
LOC110439425	40.2596	43.5253	36.994	0.840233	-0.251139	0.64909	0.8292	Down	0.440029	0.380018	0.54708	0.798026	0.159002	0.494061	110439425		protein_coding
LOC110439430	3.45932	2.76346	4.15517	1.43673	0.522787	0.705886	0.861113	Up	0.107921	0.0355057	0.109531	0.121783	0	0.035903	110439430		protein_coding
LOC110439432	43.7784	47.7153	39.8415	0.827638	-0.272928	0.543622	0.760539	Down	0.439349	0.718208	0.668859	0.956151	0.380353	0.602919	110439432		protein_coding
LOC110439435	4.99905	4.71679	5.28131	1.10069	0.138412	0.933265	0.97249	Up	0.373528	0	0.145809	0.250125	0	0.172059	110439435		protein_coding
LOC110439458	27.0987	27.5094	26.688	0.961763	-0.0562461	0.944732	0.976481	Down	0.211639	0.0996958	0.122044	0.125615	0.0173806	0.254428	110439458		protein_coding
LOC110439459	3.30858	4.48856	2.1286	0.479502	-1.06039	0.576974	0.783142	Down	0	0.0742614	0	0.0415858	0.0776786	0.0107275	110439459		protein_coding
LOC110439460	2.04272	3.17319	0.912255	0.283175	-1.82024	0.460254	0.704756	Down	0	0.0479685	0	0.141025	0.0195128	0	110439460		protein_coding
LOC110439463	6.10985	8.6521	3.56761	0.403473	-1.30945	0.215552	0.475654	Down	0.104009	0.0615936	0.0844488	0.321924	0.0250553	0.207609	110439463		protein_coding
LOC110439485	4.90167	3.90665	5.89669	1.4713	0.557088	0.66995	0.841074	Up	0.239441	0.0727161	0.0560803	0.0712607	0	0.147059	110439485		protein_coding
LOC110439486	3.44574	3.29808	3.59339	1.06013	0.0842402	0.946692	0.977036	Up	0.0192866	0.0190358	0.0782978	0.0559644	0.0116152	0.0288732	110439486		protein_coding
LOC110439488	2.49684	2.61922	2.37446	0.888787	-0.170091	0.917421	0.963977	Down	0.0518606	0	0.0877242	0.100323	0.0208217	0.0172529	110439488		protein_coding
LOC110439489	77.7914	83.8852	71.6975	0.850072	-0.234342	0.631174	0.817757	Down	0.219196	0.427774	0.546057	0.616773	0.210014	0.417645	110439489		protein_coding
LOC110439490	11.4141	6.04219	16.7861	2.6937	1.42959	0.0535225	0.209327	Up	0.0544739	0.0992592	0.0808038	0.0364772	0.0100943	0.0292745	110439490		protein_coding
LOC110439492	8.05159	13.0767	3.02644	0.228809	-2.12778	0.0627584	0.231395	Down	0	0.111012	0.0761023	0.471425	0.135474	0.130963	110439492		protein_coding
LOC110439519	4.60715	4.41899	4.79532	1.05677	0.0796654	0.955059	0.980322	Up	0.00996936	0.0098397	0.0607088	0.038571	0	0.0298494	110439519		protein_coding
LOC110439520	10.3518	13.5024	7.2012	0.530547	-0.914447	0.216102	0.475989	Down	0.0466476	0.0920819	0.142031	0.169198	0.112372	0.174585	110439520		protein_coding
LOC110439522	10.1841	12.0068	8.36135	0.69491	-0.525101	0.538657	0.758119	Down	0.137427	0.150711	0.139478	0.324928	0.165528	0.0457191	110439522		protein_coding
LOC110439525	4.41254	6.18571	2.63936	0.434727	-1.20182	0.324935	0.591205	Down	0.106406	0.0150032	0.0154278	0.0588117	0.109855	0.0910265	110439525		protein_coding
LOC110439526	4.36417	2.95792	5.77041	2.01039	1.00748	0.662016	0.836893	Up	0	0.258076	0.031221	0	0.111156	0	110439526		protein_coding
LOC110439552	4.73604	4.12119	5.3509	1.25417	0.326738	0.787176	0.901016	Up	0.107913	0.0456468	0.125169	0.104377	0	0.092315	110439552		protein_coding
LOC110439553	32.121	35.8023	28.4397	0.78858	-0.342672	0.690666	0.853013	Down	1.05443	0.655265	0.158543	1.49205	0.164635	0.506691	110439553		protein_coding
LOC110439554	12.2585	14.9527	9.56429	0.640892	-0.641848	0.322769	0.589411	Down	0.126305	0.162061	0.115371	0.1466	0.152131	0.239508	110439554		protein_coding
LOC110439555	7.74503	5.73508	9.75498	1.65302	0.725102	0.511492	0.741651	Up	0.214752	0.0780901	0.0802998	0.098392	0	0.101525	110439555		protein_coding
LOC110439557	7.04636	6.9199	7.17282	1.0184	0.0263094	0.982682	0.991938	Up	0.119827	0.162619	0.0760095	0.0724384	0	0.239183	110439557		protein_coding
LOC110439559	10.6228	13.5254	7.72018	0.562965	-0.828883	0.281873	0.550053	Down	0.37722	0.217183	0.223329	0.486484	0.151451	0.627467	110439559		protein_coding
LOC110439562	2.8664	2.78574	2.94705	1.04929	0.069408	0.964554	0.98376	Up	0.242388	0.10253	0	0.0669851	0.0417074	0.172795	110439562		protein_coding
LOC110439581	3.26627	2.66085	3.87169	1.41021	0.495912	0.669908	0.841074	Up	0.0243236	0.0192058	0.0197493	0.0235268	0.00585947	0.00971037	110439581		protein_coding
LOC110439583	6.81528	8.85022	4.78034	0.536489	-0.898379	0.315803	0.58256	Down	0.0658884	0.0780378	0.0668717	0.0764759	0.063489	0.197277	110439583		protein_coding
LOC110439586	2.01014	1.35772	2.66256	1.91586	0.937991	0.624289	0.813606	Up	0.244647	0.0965859	0.0993191	0	0	0.195333	110439586		protein_coding
LOC110439587	9.83243	14.5902	5.07463	0.352796	-1.50309	0.0479079	0.195469	Down	0.11438	0.131708	0.0773915	0.202827	0.32146	0.247337	110439587		protein_coding
LOC110439588	1.89655	0.492987	3.30012	8.33678	3.05949	0.112872	0.329096	Up	0.121662	0.24016	0.308694	0	0.0732698	0	110439588		protein_coding
LOC110439604	80.7361	72.0168	89.4555	1.24096	0.311458	0.853074	0.934485	Up	1.14726	0.301956	0.485158	0.443869	0	0.94781	110439604		protein_coding
LOC110439606	3.74929	2.06525	5.43333	2.5944	1.3754	0.389637	0.647225	Up	0.0462061	0.228026	0	0.0446924	0.0185514	0.0307436	110439606		protein_coding
LOC110439622	13.9339	6.58685	21.2809	3.10709	1.63556	0.0740742	0.25567	Up	0.184824	0.316196	0.375165	0.154933	0	0.0983795	110439622		protein_coding
LOC110439629	2.74795	2.76274	2.73316	1.02087	0.0297944	0.988628	0.994914	Up	0	0.171212	0.0220071	0.0209732	0.130587	0	110439629		protein_coding
LOC110439631	43.7857	51.7927	35.7786	0.699031	-0.516571	0.345512	0.61129	Down	0.288317	0.235983	0.321168	0.197251	0.508203	0.280733	110439631		protein_coding
LOC110439632	10.3543	15.6092	5.0994	0.325342	-1.61997	0.0666929	0.240109	Down	0.12621	0.186853	0.768563	1.03764	0.684079	1.13366	110439632		protein_coding
LOC110439639	37.6059	41.6917	33.5201	0.801836	-0.318621	0.664006	0.837858	Down	0.0302791	0.254025	0.134448	0.223315	0.113971	0.124656	110439639		protein_coding
LOC110439716	1.7216	1.32541	2.11778	1.6841	0.751978	0.717494	0.866919	Up	0	0.136287	0.105108	0	0.0831589	0.0344529	110439716		protein_coding
LOC110439743	5.66835	4.80864	6.52805	1.41036	0.496063	0.700764	0.858064	Up	0.104583	0.0656871	0.0385977	0	0.0801614	0.0379555	110439743		protein_coding
LOC110439783	15.3703	1.76745	28.9732	16.1927	4.01727	2.0401e-05	0.000719057	Up	1.84763	0.596815	0.852365	0.0649855	0.0404624	0.0670547	110439783		protein_coding
LOC110439792	18.6738	24.6331	12.7144	0.511782	-0.966398	0.165246	0.410406	Down	0.80946	0.266311	0.376539	1.07655	0.324993	1.07716	110439792		protein_coding
LOC110439798	33.7216	32.9387	34.5045	1.03837	0.0543216	0.909778	0.960183	Up	0.566622	0.384486	0.419328	0.399627	0.199058	0.541947	110439798		protein_coding
LOC110439800	13137.9	6586.13	19689.6	2.98925	1.57978	0.00187944	0.0223114	Up	1139.94	1213.93	958.708	535.507	83.2053	387.994	110439800		protein_coding
LOC110439816	1.49173	2.0846	0.898855	0.420897	-1.24846	0.633011	0.818551	Down	0.0269658	0.0532303	0	0.182577	0	0	110439816		protein_coding
LOC110439817	4.83617	6.65569	3.01664	0.465747	-1.10238	0.419464	0.672917	Down	0.00616869	0.0365308	0.0187822	0.0178998	0.0817307	0.00615658	110439817		protein_coding
LOC110439826	33.7591	33.0988	34.4195	1.03481	0.0493693	0.933949	0.972646	Up	0.354928	0.552007	0.327478	0.23927	0.181365	0.611855	110439826		protein_coding
LOC110439836	5.97921	1.81839	10.14	6.20987	2.63456	0.039736	0.173796	Up	0.159854	0.0946652	0.292032	0	0.0577624	0.0159541	110439836		protein_coding
LOC110439838	3.95574	4.06659	3.84489	0.924897	-0.112636	0.941159	0.97517	Down	0.132175	0.0372731	0.0766557	0.219163	0.0227431	0	110439838		protein_coding
LOC110439840	370.985	413.936	328.034	0.793186	-0.334269	0.196382	0.451906	Down	11.8724	9.98085	13.4137	15.6002	12.2958	10.0286	110439840		protein_coding
LOC110439853	650.589	688.572	612.606	0.89112	-0.166308	0.533176	0.75435	Down	12.1136	12.0593	11.6222	10.1321	12.8691	10.6286	110439853		protein_coding
LOC110439855	16.8962	13.1722	20.6202	1.57503	0.655376	0.225401	0.488234	Up	0.324783	0.368643	0.42852	0.2199	0.195598	0.194488	110439855		protein_coding
LOC110439859	8.99933	5.69345	12.3052	2.08744	1.06174	0.306938	0.574803	Up	0.0252165	0.0533325	0.0694661	0.0348434	0	0.0287622	110439859		protein_coding
LOC110439874	160.55	189.856	131.244	0.692983	-0.529108	0.214975	0.475098	Down	2.68021	1.17184	1.3601	1.58046	2.26544	2.40511	110439874		protein_coding
LOC110439876	4.98732	8.47481	1.49982	0.179104	-2.48113	0.0295294	0.144658	Down	0.00463498	0.00914941	0.00940831	0.0403483	0.0502447	0.0185036	110439876		protein_coding
LOC110439877	8.87126	9.57344	8.16908	0.850829	-0.233059	0.831225	0.924155	Down	0.00957901	0.0992715	0.0194439	0.0741216	0.040382	0.0191204	110439877		protein_coding
LOC110439901	2.3164	4.6328	0	0.0358792	-4.80071	0.0179299	0.10377	Down	0	0	0	0.170612	0.212459	0.0704179	110439901		protein_coding
LOC110439911	6.76366	4.55319	8.97414	1.94732	0.961489	0.32097	0.587446	Up	0.1473	0.232615	0.0597994	0.0569899	0.0354841	0.102908	110439911		protein_coding
LOC110439914	5.89829	8.22796	3.56862	0.441633	-1.17908	0.3621	0.623452	Down	0.195717	0.193172	0	0.189306	0.432185	0.0976666	110439914		protein_coding
LOC110439923	8.89794	6.26897	11.5269	1.87422	0.906292	0.384787	0.642722	Up	0.518075	0.255669	0.0657259	0.0417586	0.156003	0.172353	110439923		protein_coding
LOC110439927	14.338	9.23181	19.4441	2.08175	1.0578	0.538098	0.757878	Up	0.0491287	0.0145469	0.259282	0.14731	0	0	110439927		protein_coding
LOC110439930	5.31247	3.44233	7.18262	1.98714	0.990695	0.379808	0.638882	Up	0.278361	0.431736	0.242156	0.269242	0	0.158751	110439930		protein_coding
LOC110439932	11.3303	7.59218	15.0683	1.9473	0.961476	0.43467	0.685754	Up	0.00884265	0.130915	0.305137	0.1454	0.0106508	0.0529518	110439932		protein_coding
LOC110439937	10.2948	10.4037	10.1859	0.960256	-0.0585092	0.959873	0.981737	Down	0.247839	0.434873	0.251538	0.825703	0.0331686	0.0549673	110439937		protein_coding
LOC110439942	13.9203	21.5696	6.27092	0.288994	-1.79089	0.19307	0.448163	Down	0.0893745	0	0.385511	0.864466	0.0269125	0.602094	110439942		protein_coding
LOC110439948	2.10697	0	4.21395	20.7431	4.37456	0.118699	0.338681	Up	0	0.0281081	0.173421	0	0	0	110439948		protein_coding
LOC110439949	2.96104	5.02683	0.895251	0.179529	-2.47771	0.147379	0.384608	Down	0.0232355	0.0229333	0.0235823	0	0.111947	0.208709	110439949		protein_coding
LOC110439961	12.5379	12.3212	12.7546	1.02095	0.0299103	0.964933	0.983961	Up	0.378732	0.195803	0.201344	0.279104	0.108613	0.269992	110439961		protein_coding
LOC110439962	1.64302	1.17185	2.11418	1.84028	0.879922	0.671589	0.841746	Up	0	0.173855	0.238366	0	0.0707213	0.1172	110439962		protein_coding
LOC110439967	1.30808	0	2.61616	12.8938	3.6886	0.348807	0.613443	Up	0.179263	0	0	0	0	0	110439967		protein_coding
LOC110439973	2.10057	2.42403	1.7771	0.705074	-0.504153	0.767452	0.891	Down	0.0216835	0.00713384	0.0146714	0.0489374	0	0.00721365	110439973		protein_coding
LOC110439976	2.46216	1.35772	3.56659	2.58026	1.36752	0.550065	0.764821	Up	0.164089	0	0.333075	0	0	0.163767	110439976		protein_coding
LOC110439980	3.75111	2.37602	5.1262	2.13032	1.09107	0.619085	0.810993	Up	0	0.099588	0.245775	0	0	0.140983	110439980		protein_coding
LOC110439985	1.66526	0	3.33052	16.388	4.03457	0.158915	0.402407	Up	0	0.29526	0.173494	0	0	0	110439985		protein_coding
LOC110439988	2.26619	4.2417	0.290685	0.0771556	-3.69609	0.139048	0.371774	Down	0.0469558	0	0	0.0454175	0.452459	0	110439988		protein_coding
LOC110439991	4.25122	5.54921	2.95324	0.521246	-0.939963	0.422099	0.675627	Down	0.391813	0.128906	0.132554	0.568466	0.0786552	0.456218	110439991		protein_coding
LOC110439992	3.53424	6.16343	0.905048	0.146341	-2.7726	0.0517959	0.204956	Down	0	0.0447878	0.0921104	0.395023	0.273284	0.135867	110439992		protein_coding
LOC110439995	68.8495	69.2148	68.4842	0.984571	-0.022433	0.969411	0.985569	Down	4.06762	3.93442	1.32106	3.54093	1.07786	3.77546	110439995		protein_coding
LOC110439997	16.0761	11.6825	20.4696	1.80059	0.848471	0.32095	0.587446	Up	2.94674	1.82815	1.02539	0.244303	1.52112	0.840274	110439997		protein_coding
LOC110440002	1.7918	0	3.58359	17.6455	4.14123	0.0569544	0.217729	Up	0.0620611	0.040836	0.14697	0	0	0	110440002		protein_coding
LOC110440003	89.4262	63.3304	115.522	1.81513	0.860071	0.0042549	0.0398325	Up	2.61836	1.96818	2.14707	1.19082	0.75189	1.24604	110440003		protein_coding
LOC110440008	7.13365	11.2971	2.97025	0.259515	-1.94611	0.157754	0.400805	Down	0.0853418	0.0673855	0.0173231	0.561313	0.0205585	0.0340697	110440008		protein_coding
LOC110440009	11.4984	14.0649	8.93191	0.6482	-0.62549	0.381308	0.640223	Down	0.114023	0.0716165	0.126245	0.110288	0.18728	0.103454	110440009		protein_coding
LOC110440014	4.98889	4.86396	5.11382	1.039	0.0552009	0.966496	0.984325	Up	0.0572224	0.197674	0.232306	0.0276739	0.0344616	0.342661	110440014		protein_coding
LOC110440027	172.419	199.369	145.469	0.727757	-0.458471	0.375471	0.635647	Down	2.35543	1.31616	2.44118	3.17029	0.750549	3.53244	110440027		protein_coding			dre04060	Cytokine-cytokine receptor interaction
LOC110440028	1.51791	0.935031	2.10078	2.09992	1.07033	0.550652	0.765218	Up	0.0108209	0.0213603	0.0439296	0.0209328	0	0.0107997	110440028		protein_coding
LOC110440037	298.879	311.95	285.807	0.914762	-0.128532	0.566894	0.776048	Down	0.79486	0.830041	0.974676	0.910515	0.611033	0.928676	110440037		protein_coding
LOC110440040	3.21358	2.17718	4.24998	1.95722	0.968808	0.609861	0.805309	Up	0	0.219105	0.0375508	0.0715731	0.0445641	0	110440040		protein_coding
LOC110440049	21.1778	18.0117	24.3439	1.3266	0.407735	0.581731	0.787069	Up	0.110045	0.0668392	0.0544117	0.095523	0.0101959	0.0506903	110440049		protein_coding
LOC110440054	1.48462	0	2.96923	14.6285	3.87071	0.0979515	0.302312	Up	0.174251	0.0429963	0.221065	0	0	0	110440054		protein_coding
LOC110440055	18.8969	8.05577	29.738	3.71649	1.89394	0.00501637	0.0445849	Up	1.24841	1.04467	0.413164	0.210001	0.196132	0.216688	110440055		protein_coding
LOC110440077	5.0251	4.7261	5.3241	1.10951	0.149917	0.894116	0.952808	Up	0.220983	0.0242343	0.19936	0.189994	0.0591487	0.0980217	110440077		protein_coding
LOC110440078	13.2227	18.3088	8.13665	0.439863	-1.18487	0.156676	0.399023	Down	0.0536318	0.317606	0.353809	0.778123	0.258394	0.428213	110440078		protein_coding
LOC110440081	6.19047	0	12.3809	61.0212	5.93124	0.000336032	0.00654113	Up	1.40024	0.358303	0.421076	0	0	0	110440081		protein_coding
LOC110440097	2.54573	5.09146	0	0.0322472	-4.95468	0.150006	0.388592	Down	0	0	0	0	0	0.31589	110440097		protein_coding
LOC110440101	184.285	122.473	246.098	2.00897	1.00646	0.00497334	0.0442993	Up	7.72049	6.06086	7.29264	4.51012	2.73144	1.80554	110440101		protein_coding
LOC110440103	24.9312	23.9455	25.9169	1.0966	0.133039	0.812413	0.913146	Up	0.150246	0.130846	0.103154	0.115405	0.127743	0.052924	110440103		protein_coding
LOC110440111	40.2526	52.2227	28.2826	0.540905	-0.886552	0.0298651	0.145845	Down	0.534153	0.446098	0.319715	0.715368	0.527899	0.820162	110440111		protein_coding
LOC110440112	13.6854	15.9293	11.4414	0.717126	-0.479701	0.51862	0.745598	Down	0.354635	1.40009	0.935811	0.891844	0.854301	1.48654	110440112		protein_coding
LOC110440113	275.156	340.97	209.341	0.613089	-0.705832	0.148396	0.386231	Down	1.39412	1.45059	3.05999	5.08512	1.52746	1.97811	110440113		protein_coding
LOC110440139	6.09799	5.10716	7.08882	1.36466	0.448546	0.640233	0.823862	Up	0.321099	0.0905493	0.139667	0.15529	0.055251	0.137344	110440139		protein_coding
LOC110440142	5.40774	5.69345	5.12204	0.878646	-0.186647	0.890049	0.951567	Down	0.0211625	0.083549	0.0143189	0.0682307	0	0.0563226	110440142		protein_coding
LOC110440160	74.3234	82.2377	66.4091	0.80567	-0.311739	0.734506	0.875111	Down	0.117125	2.74554	3.5959	3.59689	0.846447	2.80548	110440160		protein_coding
LOC110440161	46.7515	34.6561	58.8469	1.68604	0.753638	0.277792	0.545462	Up	2.20128	1.51353	1.17982	0.598081	0.208537	1.72795	110440161		protein_coding
LOC110440163	248.455	315.458	181.453	0.574769	-0.798947	0.0279123	0.139242	Down	2.76035	2.69136	1.33839	3.6752	2.38254	4.17144	110440163		protein_coding
LOC110440168	86.6637	151.7	21.6273	0.142449	-2.81149	0.00113399	0.0155123	Down	0.0716581	0.171764	0.498703	0.405962	0.789127	3.24894	110440168		protein_coding
LOC110440169	38.4325	15.6781	61.1869	4.02542	2.00914	0.00201454	0.0234797	Up	0.4094	0.808151	0.724727	0.0644632	0.229355	0.104525	110440169		protein_coding
LOC110440176	1.58133	0.790788	2.37187	3.16742	1.66331	0.356113	0.61853	Up	0.0343451	0.0169492	0.0174288	0.00830499	0.010342	0	110440176		protein_coding
LOC110440177	2.24364	3.58584	0.901444	0.254749	-1.97285	0.288196	0.556718	Down	0	0	0.111856	0.0710668	0.176996	0.109994	110440177		protein_coding
LOC110440185	3.18174	0.339431	6.02404	15.2228	3.92817	0.0814106	0.270591	Up	0	0.0350483	0.14416	0	0	0.0088601	110440185		protein_coding
LOC110440193	4.79915	0	9.5983	47.2432	5.56203	0.000802955	0.0121799	Up	0.311522	0.653375	0.27665	0	0	0	110440193		protein_coding
LOC110440195	140.376	151.561	129.191	0.850606	-0.233437	0.310424	0.578183	Down	3.74841	3.64933	3.64908	4.31621	2.91779	3.94465	110440195		protein_coding
LOC110440199	6.34474	6.39952	6.28996	1.02376	0.0338813	0.977603	0.989544	Up	0.167135	0.263938	0.271407	0.0323319	0.442883	0.0667227	110440199		protein_coding
LOC110440201	637.038	917.193	356.882	0.389385	-1.36073	0.000208166	0.00454943	Down	4.46402	7.49014	7.75243	12.3936	17.4846	12.3262	110440201		protein_coding
LOC110440208	5.923	6.15339	5.6926	0.958221	-0.0615697	0.950489	0.978903	Down	0.0238629	0.0423946	0.024219	0.0184649	0.0459878	0.0142896	110440208		protein_coding
LOC110440209	9.84141	10.3664	9.31639	0.922476	-0.116417	0.90951	0.960131	Down	0.0276414	0.0763894	0.0673295	0.0106944	0.0998806	0.038622	110440209		protein_coding
LOC110440211	16.2514	16.7172	15.7857	0.936434	-0.0947505	0.876276	0.945222	Down	0.332474	0.313234	0.15338	0.3362	0.163824	0.241325	110440211		protein_coding
LOC110440214	93.2404	89.5241	96.9567	1.08165	0.113236	0.711305	0.864146	Up	6.92939	4.31954	5.76373	5.54332	3.63974	4.31587	110440214		protein_coding
LOC110440216	7.57914	11.5613	3.59699	0.315004	-1.66656	0.114302	0.33139	Down	0.0643684	0.0952969	0.228652	0.0933896	0.465183	0.449695	110440216		protein_coding
LOC110440222	3.61471	1.85071	5.37872	2.92379	1.54784	0.260886	0.527855	Up	0.0597015	0.0785668	0.040395	0	0.0119849	0.0397229	110440222		protein_coding
LOC402866	191.376	233.504	149.248	0.638035	-0.648292	0.146104	0.382744	Down	1.25333	1.2191	0.553059	2.24885	0.838673	1.11189	402866		protein_coding
LOC402879	348.67	345.322	352.019	1.0186	0.0265944	0.955285	0.980322	Up	2.95885	5.72306	4.02601	6.45766	2.76755	1.82807	402879		protein_coding
LOC405768	34.4234	20.3584	48.4884	2.35305	1.23453	0.0474766	0.194445	Up	1.25143	0.380049	0.628077	0.345839	0.115948	0.370576	405768	protein kinase Npk	protein_coding			dre04010	MAPK signaling pathway
LOC407643	10.2359	9.43285	11.0389	1.15865	0.212439	0.767611	0.891	Up	0.0771124	0.0553524	0.128067	0.0813668	0.0422184	0.0699646	407643		protein_coding
LOC553228	120.414	104.248	136.581	1.30462	0.38363	0.285061	0.553736	Up	4.3827	2.92341	3.76378	3.81987	1.68228	1.89865	553228	gamma-glutamyl hydrolase	protein_coding			dre00790	Folate biosynthesis
LOC553386	3141.95	2712.21	3571.68	1.3167	0.396924	0.180545	0.431439	Up	104.41	158.436	133.887	125.731	68.3488	69.1826	553386		protein_coding
LOC553450	116.394	136.754	96.035	0.703564	-0.507247	0.333198	0.599484	Down	3.72616	3.51053	11.0015	6.00681	8.02414	7.60672	553450		protein_coding
LOC553492	15.9576	16.0124	15.9028	0.990059	-0.0144134	0.988104	0.994665	Down	0.026731	0.0439722	0.167301	0.133586	0.0590277	0.0177857	553492		protein_coding
LOC553528	71.9354	63.9107	79.9602	1.25477	0.327423	0.51845	0.745459	Up	2.67975	1.34944	0.88808	1.39296	1.16373	0.764141	553528	OCIA domain-containing protein 1-like	protein_coding
LOC555374	72.9682	60.3966	85.5398	1.41458	0.500377	0.406652	0.660959	Up	3.34202	5.25076	1.10756	3.00164	1.64302	1.36141	555374		protein_coding
LOC555422	7.96455	6.66373	9.26538	1.36832	0.452401	0.714161	0.865814	Up	0.09006	0.0888887	0.171383	0.0326661	0	0.191002	555422		protein_coding
LOC555499	111.145	94.311	127.979	1.35415	0.437385	0.255918	0.521629	Up	2.33989	1.39141	2.53706	1.98209	1.05032	0.971831	555499		protein_coding
LOC555502	28.1334	31.3956	24.8712	0.801973	-0.318374	0.571212	0.77909	Down	0.458297	0.818514	0.531585	0.591045	0.867444	0.435617	555502		protein_coding
LOC555645	414.608	348.574	480.641	1.37602	0.4605	0.215324	0.475435	Up	5.3285	5.2592	6.3913	6.18269	2.02943	2.75361	555645		protein_coding
LOC555793	68.049	70.9518	65.1461	0.926993	-0.109369	0.816445	0.914806	Down	0.507743	0.639134	0.455573	0.362994	0.691336	0.374552	555793		protein_coding
LOC556095	83.8193	30.0731	137.565	4.50344	2.17103	1.08054e-05	0.000429655	Up	0.549517	0.423603	0.883393	0.201743	0.0531439	0.108087	556095		protein_coding
LOC556106	476.738	571.614	381.861	0.668987	-0.579951	0.164137	0.409031	Down	4.05319	5.97798	4.65126	3.96496	8.39091	5.66563	556106		protein_coding	GO:0003674,GO:0005576,GO:0005615,GO:0016020,GO:0045721,GO:0046890	molecular_function|extracellular region|extracellular space|membrane|negative regulation of gluconeogenesis|regulation of lipid biosynthetic process
LOC556339	16.3511	19.1146	13.5875	0.71085	-0.492383	0.642702	0.824691	Down	0.0123894	0.256795	0.28921	0.383474	0.238765	0.0618256	556339		protein_coding			dre04540	Gap junction
LOC556363	1238.83	1264.27	1213.38	0.959302	-0.0599433	0.72993	0.872491	Down	22.6067	20.8592	20.3046	23.7148	15.2092	18.4658	556363		protein_coding
LOC556594	20.7829	14.5851	26.9807	1.82138	0.865032	0.296777	0.564976	Up	0.794979	0.45075	0.291837	0.572611	0.101866	0.0844062	556594		protein_coding			dre04530	Tight junction
LOC556668	720.913	701.801	740.025	1.05376	0.0755396	0.899805	0.95527	Up	5.83108	2.26698	2.02332	5.16288	0.769556	2.74435	556668		protein_coding
LOC556735	47.2499	42.3007	52.1992	1.22828	0.296644	0.779272	0.897067	Up	0.368631	0.780918	0.410633	0.452216	0	0.708896	556735		protein_coding
LOC556776	23.7545	26.4816	21.0273	0.785283	-0.348716	0.693833	0.854556	Down	0.204448	0.524652	0.221333	0.632802	0.0328338	0.448904	556776		protein_coding
LOC556872	580.759	483.135	678.382	1.40211	0.487596	0.192633	0.447772	Up	2.36121	3.11075	2.35441	1.88986	0.760904	2.27734	556872		protein_coding
LOC556912	2.52749	2.92999	2.12499	0.710346	-0.493405	0.798462	0.906319	Down	0	0.185295	0.0317563	0.090793	0	0.187368	556912		protein_coding
LOC556989	1041.89	1360.95	722.835	0.531412	-0.912097	0.0225958	0.121674	Down	5.60222	6.35055	10.4615	10.5334	15.5555	8.73744	556989		protein_coding
LOC557301	1.48759	0.339431	2.63576	6.67476	2.73872	0.283511	0.551509	Up	0.339065	0	0.0983216	0	0	0.0483429	557301	cocaine- and amphetamine-regulated transcript protein-like	protein_coding	GO:0005184,GO:0005576,GO:0005615,GO:0007186,GO:0007268,GO:0008343,GO:0009267,GO:0032099	neuropeptide hormone activity|extracellular region|extracellular space|G protein-coupled receptor signaling pathway|chemical synaptic transmission|adult feeding behavior|cellular response to starvation|negative regulation of appetite
LOC557306	79.5562	37.6805	121.432	3.19982	1.67799	0.000856397	0.0127359	Up	0.491092	0.484705	1.22688	0.260991	0.117002	0.220827	557306		protein_coding
LOC557729	145.999	141.33	150.668	1.07195	0.10024	0.782496	0.898856	Up	4.77753	5.00356	3.60969	2.77261	4.28386	3.3642	557729		protein_coding
LOC557816	2.26987	0.678862	3.86088	5.44898	2.44599	0.202869	0.459918	Up	0.041794	0.0082501	0.0593849	0	0	0.0166848	557816		protein_coding
LOC558044	4059.74	5813.75	2305.73	0.396659	-1.33403	0.000183854	0.00413733	Down	5.8809	7.94185	8.06576	11.2804	19.6845	14.6167	558044	spectrin%2C beta%2C non-erythrocytic 1	protein_coding
LOC558202	796.457	989.675	603.24	0.610103	-0.712874	0.0027748	0.0292597	Down	4.54025	5.2656	5.05612	6.42713	7.17926	6.95491	558202		protein_coding
LOC558353	13.5634	27.1269	0	0.00605989	-7.36649	4.59225e-07	3.05706e-05	Down	0	0	0	0.16629	0.16825	0.50403	558353		protein_coding
LOC558704	64.9177	69.1603	60.6751	0.876984	-0.189378	0.686761	0.850731	Down	0.469092	1.17732	1.06101	0.803741	0.726444	1.12361	558704		protein_coding
LOC558721	726.901	881.896	571.905	0.649002	-0.623705	0.221613	0.483563	Down	8.52643	18.0849	14.4009	13.0579	27.7495	10.6156	558721		protein_coding
LOC558761	522.954	722.547	323.362	0.447912	-1.15871	0.0036727	0.0359225	Down	2.81753	3.61354	2.41901	3.35108	6.51109	6.53136	558761		protein_coding
LOC558805	3.17178	1.489	4.85455	3.13461	1.64829	0.462036	0.706299	Up	0	0.404848	0.0960703	0.152594	0	0	558805		protein_coding
LOC558816	7.35915	0.832418	13.8859	18.2449	4.18942	0.00522542	0.0459359	Up	0.240865	1.34715	0.24446	0	0.0483528	0.0400654	558816		protein_coding			dre04216,dre04217	Ferroptosis|Necroptosis
LOC558818	1.19934	0	2.39867	11.8055	3.56139	0.139736	0.372893	Up	0.0308886	0.0609737	0.0313496	0	0	0	558818	protein NLRC3-like	protein_coding
LOC558876	59.2499	43.543	74.9568	1.73522	0.795115	0.130633	0.357961	Up	2.27797	1.61202	1.52677	1.12246	1.13892	0.364618	558876		protein_coding
LOC559131	1.50141	0.935031	2.06779	2.07373	1.05223	0.557134	0.770217	Up	0.0484032	0.0119434	0.0245628	0.0234088	0	0.0120771	559131		protein_coding
LOC559142	1.35623	0.2978	2.41466	6.09836	2.60842	0.308814	0.576728	Up	0	0.112575	0.192934	0.0367739	0	0	559142		protein_coding
LOC559196	267.732	336.626	198.839	0.590197	-0.760732	0.072785	0.253227	Down	1.09496	1.12074	2.29806	3.46492	1.66892	1.54477	559196		protein_coding
LOC559637	8.00907	0	16.0181	78.9222	6.30236	1.96573e-05	0.000695238	Up	0.365594	0.18042	0.214068	0	0	0	559637		protein_coding
LOC559843	11.9466	13.6589	10.2343	0.752911	-0.409449	0.672925	0.842361	Down	0.0665339	0.22515	0.0289401	0.0551608	0.125932	0.180238	559843		protein_coding
LOC559859	83.1405	98.1749	68.106	0.694965	-0.524988	0.112535	0.328555	Down	1.80011	1.2872	1.11856	1.67007	1.50446	1.9799	559859		protein_coding
LOC560099	393.389	431.149	355.63	0.824078	-0.279147	0.164097	0.409031	Down	1.19514	1.28459	1.24791	1.40716	1.00993	1.47695	560099		protein_coding
LOC560232	6.13618	2.74411	9.52825	3.39822	1.76478	0.110313	0.324708	Up	0.146724	0.0434448	0.282936	0.0425752	0.0176726	0.0585745	560232	novel nacht domain containing protein	protein_coding
LOC560447	175.186	230.332	120.041	0.520101	-0.943136	0.001514	0.0191735	Down	1.01879	1.48342	1.54587	2.55622	1.60375	2.58727	560447		protein_coding
LOC560461	83.0644	95.9791	70.1497	0.73044	-0.453163	0.246678	0.510942	Down	0.148568	0.263345	0.298492	0.269805	0.226422	0.338917	560461		protein_coding			dre04144	Endocytosis
LOC560627	468.273	555.647	380.9	0.685791	-0.544159	0.0365351	0.16545	Down	11.1492	14.9724	10.158	17.4032	14.1502	13.8024	560627		protein_coding			dre00230,dre00240,dre00760	Purine metabolism|Pyrimidine metabolism|Nicotinate and nicotinamide metabolism
LOC560647	33.355	57.5864	9.12361	0.159657	-2.64695	0.0116741	0.0774223	Down	0.226368	0.042557	0.0656419	0.104263	1.25941	0.215166	560647		protein_coding			dre04080	Neuroactive ligand-receptor interaction
LOC560863	12.07	15.6874	8.45256	0.547065	-0.870216	0.394806	0.651529	Down	0.0393029	0.245681	0.079779	0.0760308	0.347157	0.117677	560863		protein_coding
LOC560870	66.3747	70.71	62.0394	0.875127	-0.192435	0.561113	0.772521	Down	1.33864	1.1075	1.65831	1.71368	1.067	1.25742	560870		protein_coding
LOC561000	216.027	238.811	193.243	0.807633	-0.308228	0.29732	0.565618	Down	3.00922	2.92244	4.5077	4.26479	2.57789	4.33634	561000		protein_coding
LOC561083	3.49885	4.04085	2.95685	0.733225	-0.447672	0.775274	0.894778	Down	0.0700198	0.0345546	0.0118441	0	0.0281125	0.104824	561083		protein_coding			dre04080	Neuroactive ligand-receptor interaction
LOC561147	4.33472	2.99024	5.6792	1.99957	0.999691	0.434493	0.685651	Up	0.0557883	0.073417	0.0471841	0	0.0447973	0.0278394	561147		protein_coding
LOC561230	65.3843	71.7362	59.0325	0.825483	-0.27669	0.463887	0.707491	Down	0.58871	1.01053	0.922222	0.953166	0.878654	0.779148	561230		protein_coding
LOC561283	27.0293	11.7112	42.3474	3.74737	1.90588	0.00989198	0.06969	Up	0.244374	0.60299	0.476964	0.0545466	0.181135	0.0562834	561283		protein_coding
LOC561325	176.607	206.113	147.102	0.715751	-0.482471	0.0485508	0.197032	Down	7.30913	5.45827	6.35847	8.00483	7.35971	7.33338	561325	thiosulfate sulfurtransferase/rhodanese-like domain-containing protein 1	protein_coding
LOC561346	13.6499	0.985975	26.3138	34.4467	5.10629	2.57465e-05	0.000864323	Up	0.366663	0.487166	0.386448	0	0.0339722	0	561346		protein_coding
LOC561377	39.759	41.0861	38.4319	0.948345	-0.0765154	0.898449	0.954622	Down	0.650973	0.592114	0.401595	0.259266	0.768709	0.382174	561377		protein_coding
LOC561423	129.053	121.448	136.657	1.12024	0.163805	0.689168	0.85202	Up	0.866815	0.611102	0.799317	0.64678	0.268473	0.860171	561423		protein_coding			dre04530	Tight junction
LOC562049	10.6644	15.6301	5.69879	0.36812	-1.44175	0.256409	0.522278	Down	0.0346713	0.0684409	0.0615804	0	0.208805	0.147064	562049		protein_coding
LOC562053	133.031	142.578	123.484	0.866976	-0.205936	0.681353	0.847654	Down	5.4718	1.83665	1.95608	2.39986	2.64161	3.9355	562053		protein_coding
LOC562097	108.743	65.3352	152.151	2.31248	1.20944	0.00134677	0.0175551	Up	0.981997	1.53795	1.60618	0.761432	0.332356	0.469786	562097		protein_coding
LOC562098	30.625	34.8754	26.3746	0.750447	-0.414178	0.394346	0.65119	Down	0.437682	0.805072	0.504789	0.846688	0.431329	0.754513	562098		protein_coding
LOC562466	1.22551	0.339431	2.11159	5.3303	2.41422	0.2904	0.558712	Up	0.011846	0.0584599	0.0120228	0	0	0.0118228	562466		protein_coding
LOC562542	317.341	265.279	369.403	1.38897	0.47402	0.350004	0.61433	Up	7.88876	10.8434	8.77548	11.0144	1.85206	5.18213	562542	uncharacterized LOC562542	protein_coding
LOC562564	2.38869	4.1692	0.60817	0.143826	-2.7976	0.339726	0.605394	Down	0	0.0233676	0	0.160299	0	0	562564		protein_coding
LOC562630	136.283	121.687	150.879	1.23814	0.308172	0.454449	0.70131	Up	2.90777	1.52261	1.21651	1.83565	0.989214	1.11874	562630		protein_coding
LOC562648	432.201	557.005	307.397	0.55174	-0.85794	0.0503736	0.201514	Down	0.794954	2.14035	2.60707	3.54118	2.39051	2.77418	562648		protein_coding
LOC562770	1.68231	3.06054	0.304085	0.107002	-3.22429	0.19782	0.454185	Down	0	0.0320097	0	0.0627382	0.195316	0	562770		protein_coding
LOC562960	3.4463	1.77676	5.11585	3.02775	1.59824	0.402489	0.657953	Up	0.0177062	0.0567966	0	0.00428153	0.015995	0	562960		protein_coding
LOC563036	181.548	232.201	130.894	0.562699	-0.829564	0.081372	0.270553	Down	0.680459	1.54987	1.57602	2.02513	0.987722	2.93416	563036		protein_coding
LOC563082	134.639	128.906	140.372	1.08415	0.116559	0.730603	0.872837	Up	1.27903	1.42337	1.33297	1.68548	0.723756	0.856724	563082		protein_coding
LOC563292	61.0702	57.1396	65.0007	1.14207	0.191652	0.589861	0.791402	Up	0.843003	0.842186	0.552999	0.576736	0.532455	0.564319	563292		protein_coding
LOC563477	9.19683	5.04325	13.3504	2.55482	1.35322	0.189296	0.443357	Up	0.557036	0.35856	0.172063	0.304532	0.0291712	0.0483429	563477		protein_coding
LOC563479	4.63762	6.25601	3.01923	0.488334	-1.03406	0.426747	0.679507	Down	0	0.0565261	0.0871885	0.0830921	0.120718	0.0428689	563479		protein_coding
LOC563561	2.87365	0.678862	5.06844	7.13148	2.8342	0.10601	0.316269	Up	0.0814645	0.0918915	0.0236229	0	0	0.0232299	563561		protein_coding			dre04144	Endocytosis
LOC563567	2.36314	2.32142	2.40487	1.00782	0.0112429	0.993738	0.996884	Up	0.0101082	0.0299301	0.041036	0.0488851	0.0121751	0.0100883	563567		protein_coding			dre04020,dre04080	Calcium signaling pathway|Neuroactive ligand-receptor interaction
LOC563780	345.072	393.181	296.964	0.756747	-0.402117	0.125036	0.348887	Down	3.10563	3.62885	3.22315	4.0601	3.99407	3.09954	563780		protein_coding
LOC563933	116.951	134.833	99.0678	0.73392	-0.446306	0.0774798	0.262557	Down	1.11792	1.07329	1.18618	1.64161	1.10169	1.21716	563933		protein_coding
LOC564253	22.9616	15.3408	30.5823	1.95065	0.963955	0.111783	0.327022	Up	0.149674	0.282609	0.231164	0.157359	0.0391911	0.103917	564253		protein_coding
LOC564281	14.9707	22.7501	7.1914	0.312216	-1.67938	0.0135029	0.0858731	Down	0.106975	0.168934	0.238857	0.682904	0.231928	0.533824	564281		protein_coding
LOC564564	156.772	143.771	169.773	1.17745	0.23566	0.440088	0.689923	Up	1.97816	1.95243	1.87314	2.11061	1.08079	1.09908	564564		protein_coding
LOC564671	3.20631	1.97195	4.44067	2.36503	1.24186	0.579718	0.785357	Up	0.300545	0.197758	0	0	0.160889	0	564671		protein_coding
LOC564674	4.62131	8.0335	1.20913	0.148815	-2.74841	0.0292205	0.143841	Down	0	0.0376947	0.0387614	0.240112	0.115002	0.0952912	564674		protein_coding
LOC564730	13.8602	12.6449	15.0755	1.18061	0.239533	0.78748	0.901075	Up	0.280176	0.0691331	0.16249	0.0871064	0.0361571	0.249666	564730		protein_coding
LOC564731	2.84505	0.678862	5.01123	7.06297	2.82028	0.112898	0.329096	Up	0.164908	0.0443901	0.0456462	0	0	0.0299245	564731		protein_coding			dre04142	Lysosome
LOC564739	3.23515	4.10822	2.36208	0.562111	-0.831074	0.566037	0.775678	Down	0.0661985	0.026135	0.0134373	0.140866	0.0159469	0.0132137	564739		protein_coding	GO:0000166,GO:0003951,GO:0004143,GO:0005509,GO:0005524,GO:0005886,GO:0007165,GO:0007205,GO:0016301,GO:0016310,GO:0016740,GO:0035556,GO:0046339,GO:0046834	nucleotide binding|NAD+ kinase activity|diacylglycerol kinase activity|calcium ion binding|ATP binding|plasma membrane|signal transduction|protein kinase C-activating G protein-coupled receptor signaling pathway|kinase activity|phosphorylation|transferase activity|intracellular signal transduction|diacylglycerol metabolic process|lipid phosphorylation	dre00561,dre00564,dre04070	Glycerolipid metabolism|Glycerophospholipid metabolism|Phosphatidylinositol signaling system
LOC564748	22.4294	26.0611	18.7977	0.711356	-0.491356	0.376403	0.636378	Down	0.294507	0.303889	0.244556	0.453185	0.145116	0.440894	564748		protein_coding
LOC564755	1.69715	3.39431	0	0.0483436	-4.37053	0.249116	0.513737	Down	0	0	0	0	0	0.39923	564755		protein_coding
LOC564808	72.6822	47.045	98.3193	2.08275	1.05849	0.00767404	0.059017	Up	2.58597	3.40311	1.87121	1.50538	0.865207	0.908091	564808		protein_coding
LOC565175	9.8366	5.03687	14.6363	2.82168	1.49655	0.0842308	0.27629	Up	0.147014	0.187778	0.0877692	0.0418228	0.0104162	0.077678	565175	uncharacterized LOC565175	protein_coding	GO:0005886,GO:0016020,GO:0030513	plasma membrane|membrane|positive regulation of BMP signaling pathway
LOC565594	3.71904	5.0626	2.37548	0.461304	-1.11621	0.560825	0.772432	Down	0.0152852	0.0113148	0.00387833	0.062834	0	0	565594		protein_coding
LOC565691	2.00087	3.10289	0.898855	0.282233	-1.82504	0.350729	0.614835	Down	0.00634371	0.0125224	0	0.0429512	0	0.0189938	565691		protein_coding
LOC565819	171.103	206.186	136.019	0.66221	-0.594639	0.23434	0.497707	Down	0.745428	0.933393	0.852534	0.618776	1.6818	0.788381	565819		protein_coding			dre03250	Viral life cycle - HIV-1
LOC565905	1.28524	2.27979	0.290685	0.139123	-2.84557	0.284571	0.553047	Down	0.0120576	0	0	0.0699755	0.0145231	0	565905		protein_coding
LOC565947	29.8027	41.641	17.9644	0.430052	-1.21742	0.0538683	0.210117	Down	0.146672	0.157925	0.500714	0.554571	0.353327	0.705306	565947		protein_coding
LOC566011	129.795	144.88	114.71	0.795328	-0.330379	0.246141	0.510415	Down	1.67578	1.82509	2.05268	2.04008	2.10545	1.77342	566011		protein_coding
LOC566136	19.7177	15.3781	24.0574	1.57488	0.655238	0.284122	0.552383	Up	0.512199	0.245547	0.430727	0.297252	0.229147	0.116844	566136		protein_coding
LOC566194	2.76716	1.95332	3.58101	1.75483	0.811335	0.555119	0.768264	Up	0.0905734	0.0893954	0.0919251	0.0438031	0	0.0903956	566194		protein_coding
LOC566378	275.023	329.949	220.096	0.668768	-0.580422	0.0876759	0.282661	Down	1.5371	1.57129	1.95701	2.12392	2.63659	1.56147	566378		protein_coding			dre04146	Peroxisome
LOC566587	507.432	658.281	356.584	0.541119	-0.885983	0.00159942	0.0198571	Down	4.02218	4.89205	4.68355	10.7014	5.20146	6.10672	566587		protein_coding
LOC566640	3434.55	2264.07	4605.03	2.03348	1.02395	0.0358119	0.163466	Up	106.834	66.0952	37.3914	43.5622	11.7516	36.7557	566640		protein_coding
LOC566646	11115.4	20291.4	1939.43	0.0955817	-3.38712	1.2785e-07	9.80567e-06	Down	15.4386	7.20502	33.4052	66.0885	252.07	147.412	566646		protein_coding
LOC566907	62.3592	64.8242	59.8942	0.93164	-0.102156	0.833103	0.925181	Down	1.20495	1.97465	1.36137	1.29741	1.88947	0.884918	566907	Gig2-like protein DreN	protein_coding
LOC567058	1021.64	1175.22	868.048	0.738627	-0.437083	0.0239723	0.125912	Down	6.52869	6.88648	7.29813	9.93705	7.05758	7.11275	567058		protein_coding
LOC567149	3.16149	3.9439	2.37908	0.617736	-0.694937	0.76513	0.890177	Down	0.0503711	0.049716	0	0	0.121342	0	567149		protein_coding
LOC567472	50.725	63.0856	38.3644	0.613026	-0.70598	0.186481	0.43924	Down	1.02793	1.90231	1.17369	1.24282	2.63102	1.66712	567472	uncharacterized LOC567472	protein_coding			dre04060	Cytokine-cytokine receptor interaction
LOC567498	46.0419	59.7674	32.3163	0.53914	-0.891267	0.339872	0.605419	Down	0.269296	0.195848	1.07888	0.507239	0.136573	1.86723	567498		protein_coding			dre04020,dre04080	Calcium signaling pathway|Neuroactive ligand-receptor interaction
LOC567622	6.93067	4.07956	9.78178	2.29463	1.19826	0.26333	0.530233	Up	0.155035	0.0810101	0.0647908	0.0705677	0	0.0455091	567622	protein argonaute-3	protein_coding
LOC567650	4.77806	3.55425	6.00186	1.63106	0.705811	0.539377	0.758333	Up	0.0413572	0.0816386	0.153906	0.106673	0.0166046	0.0275173	567650		protein_coding
LOC567656	110.024	46.9243	173.123	3.66467	1.87368	0.000713656	0.011173	Up	10.5852	15.3414	6.21973	4.90367	1.54338	1.39006	567656		protein_coding
LOC567670	152.324	134.705	169.944	1.2619	0.335601	0.136381	0.367862	Up	0.422093	0.382055	0.36988	0.304705	0.228161	0.265088	567670		protein_coding
LOC567790	17.2699	24.6554	9.88436	0.396435	-1.33484	0.0373173	0.167658	Down	0.0189537	0.0303991	0.0288548	0.0641646	0.025683	0.0827596	567790		protein_coding
LOC567936	4.02953	2.95865	5.10042	1.665	0.735525	0.520054	0.746233	Up	0.0147086	0.0290347	0.0398084	0.0284536	0.00590542	0.00978652	567936		protein_coding
LOC567978	8.68814	13.4644	3.91189	0.28715	-1.80013	0.0457302	0.189836	Down	0.0230059	0.0794736	0.0466986	0.14464	0.0692755	0.241088	567978		protein_coding			dre04080,dre04270	Neuroactive ligand-receptor interaction|Vascular smooth muscle contraction
LOC567984	40.3373	52.4069	28.2676	0.541118	-0.885985	0.0755564	0.258715	Down	0.439	0.381709	0.169734	0.626818	0.528767	0.406843	567984		protein_coding	GO:0008270,GO:0046872	zinc ion binding|metal ion binding
LOC568037	410.134	351.156	469.112	1.33636	0.418306	0.0905504	0.287621	Up	2.78261	2.22855	1.76345	1.5766	1.24843	1.51091	568037		protein_coding
LOC568375	19.321	18.2579	20.3841	1.09624	0.13256	0.836582	0.926999	Up	0.171813	0.317959	0.239768	0.332369	0.0776044	0.182193	568375		protein_coding
LOC568392	5.36119	4.84168	5.8807	1.19742	0.259928	0.875745	0.945066	Up	0.12458	0.0409866	0	0.0481996	0	0.0746014	568392		protein_coding
LOC568486	2.09181	1.1912	2.99243	2.35869	1.23799	0.512056	0.741811	Up	0.0103705	0.0102356	0.0315759	0.0200616	0	0	568486		protein_coding	GO:0006886,GO:0006887,GO:0016020,GO:0030054,GO:0042391,GO:0042734,GO:0044325,GO:0045202,GO:0046872,GO:0048167,GO:0048788,GO:0048791,GO:0050806,GO:2000300	intracellular protein transport|exocytosis|membrane|cell junction|regulation of membrane potential|presynaptic membrane|transmembrane transporter binding|synapse|metal ion binding|regulation of synaptic plasticity|cytoskeleton of presynaptic active zone|calcium ion-regulated exocytosis of neurotransmitter|positive regulation of synaptic transmission|regulation of synaptic vesicle exocytosis
LOC568584	2171.43	2604.12	1738.74	0.667969	-0.582147	0.0260902	0.132904	Down	7.66891	7.76183	6.43851	8.71024	10.3764	8.36942	568584		protein_coding	GO:0003674,GO:0005575,GO:0008150	molecular_function|cellular_component|biological_process
LOC568600	4.06242	3.40069	4.72415	1.3389	0.421053	0.758264	0.886801	Up	0.0198304	0.00782899	0.00402527	0.0153446	0	0.00593744	568600		protein_coding
LOC568645	3.89031	1.1912	6.58942	5.10299	2.35134	0.136856	0.368658	Up	0.0805277	0.0993505	0.265621	0.0778896	0	0	568645		protein_coding			dre00512,dre00514	Mucin type O-glycan biosynthesis|Other types of O-glycan biosynthesis
LOC568656	16.248	1.38639	31.1097	21.8843	4.45182	6.7331e-06	0.000301049	Up	1.35696	1.5536	2.75443	0.157501	0.0653774	0	568656		protein_coding			dre03320	PPAR signaling pathway
LOC568758	3.95808	4.96292	2.95324	0.594316	-0.750698	0.491292	0.727295	Down	0.0847917	0.0278963	0.0286857	0.0820139	0.0510649	0.0705211	568758		protein_coding
LOC568851	122.202	151.616	92.7871	0.612212	-0.707897	0.00795287	0.06043	Down	2.26202	2.2326	2.08122	3.86464	2.75003	2.61627	568851		protein_coding
LOC568883	21.7006	23.6851	19.7161	0.81966	-0.286902	0.597435	0.796398	Down	0.291764	0.34282	0.282017	0.470343	0.15061	0.360522	568883		protein_coding			dre03320	PPAR signaling pathway
LOC568955	7.19749	8.45912	5.93587	0.710644	-0.492801	0.619944	0.811642	Down	0.114144	0.0500708	0.0901035	0.0245343	0.106932	0.164551	568955		protein_coding
LOC569025	183.409	261.758	105.06	0.402381	-1.31337	0.00136369	0.0176968	Down	1.18509	0.707246	0.545444	1.3262	1.99174	1.70538	569025		protein_coding
LOC569077	4.86628	7.93947	1.79309	0.22996	-2.12055	0.18519	0.437603	Down	0.0257523	0	0.130683	0.0996345	0.403235	0.0257017	569077	serpin peptidase inhibitor%2C clade B (ovalbumin)%2C member 1-like	protein_coding
LOC569097	165.889	143.621	188.156	1.31374	0.393679	0.0993157	0.304596	Up	3.57472	3.29301	3.16045	2.12067	1.99018	2.39433	569097		protein_coding
LOC569262	163.324	191.407	135.241	0.704331	-0.505674	0.156709	0.399023	Down	2.25075	1.89143	1.69694	2.71194	1.2548	3.27323	569262		protein_coding			dre04142	Lysosome
LOC569265	116.626	201.234	32.0178	0.158869	-2.65409	0.00918806	0.066178	Down	0.0788879	0.108451	0.114379	1.69503	0.0610836	0.0590499	569265		protein_coding
LOC569391	6.75605	4.87966	8.63244	1.74954	0.806978	0.350178	0.614468	Up	0.308322	0.253593	0.182538	0.198814	0.0928418	0.0769292	569391		protein_coding
LOC569401	4.65644	0.678862	8.63401	12.1026	3.59724	0.0183656	0.105348	Up	0.275827	0.13612	0.391921	0	0	0.0550571	569401		protein_coding
LOC569534	105.469	82.7252	128.213	1.54242	0.6252	0.384094	0.642065	Up	0.580678	0.75682	1.86626	1.37534	0.161404	0.371499	569534		protein_coding
LOC569566	15.5071	16.0455	14.9688	0.955199	-0.0661264	0.944446	0.976426	Down	0.205861	0.31259	0.273221	0.0612668	0.495911	0.0948264	569566		protein_coding			dre04010,dre04020,dre04520,dre04810	MAPK signaling pathway|Calcium signaling pathway|Adherens junction|Regulation of actin cytoskeleton
LOC569568	2.53403	3.00028	2.06779	0.674855	-0.56735	0.672465	0.842184	Down	0.0443789	0.0109504	0.0225206	0.0536563	0.0133634	0.0332188	569568		protein_coding			dre00562	Inositol phosphate metabolism
LOC569612	9.05816	6.73675	11.3796	1.6726	0.742094	0.525576	0.749129	Up	0.13444	0.182451	0.32406	0.260071	0.0809651	0	569612		protein_coding
LOC569920	11.5837	10.9828	12.1846	1.09038	0.124835	0.875563	0.945015	Up	0.212669	0.0787137	0.256314	0.257128	0.0640389	0.119392	569920		protein_coding
LOC569982	2.05684	1.72582	2.38786	1.363	0.446786	0.765201	0.890177	Up	0.0354263	0.0174828	0.0898874	0.0513986	0.0213351	0.0176784	569982		protein_coding
LOC570014	5079.49	4863.87	5295.11	1.08888	0.122841	0.757149	0.886247	Up	77.6767	95.9306	95.7756	56.5475	98.9612	47.1062	570014		protein_coding
LOC570021	6.14627	6.97723	5.31532	0.748453	-0.418015	0.674969	0.843372	Down	0.180805	0.0648922	0.0500464	0.174882	0.0395956	0.131237	570021		protein_coding
LOC570079	18.87	17.9686	19.7713	1.09976	0.137185	0.807419	0.911283	Up	0.189528	0.299301	0.346241	0.29331	0.197845	0.163935	570079		protein_coding
LOC570115	1.41949	0.790788	2.04819	2.6937	1.42959	0.532363	0.753934	Up	0.307853	0.0506416	0	0.049628	0.0618005	0	570115		protein_coding			dre04217	Necroptosis
LOC570163	8.01758	12.1403	3.89489	0.325942	-1.61731	0.124567	0.348007	Down	0.0473731	0.0779283	0.0801335	0.183285	0.30432	0.0315201	570163		protein_coding
LOC570184	7.85151	6.89689	8.80613	1.27943	0.355496	0.743142	0.879984	Up	0.324344	0.0291023	0.0897775	0.0570397	0.0710301	0.161854	570184		protein_coding
LOC570251	17.9844	27.2755	8.69325	0.316449	-1.65995	0.0739649	0.255507	Down	0.0819199	0.161709	0.051964	0.19809	0.0493354	0.582534	570251		protein_coding
LOC570372	3.44403	3.59516	3.29291	0.96207	-0.0557868	0.9688	0.985304	Down	0.0143177	0.0141315	0.05086	0.00692435	0.0517363	0.00714482	570372		protein_coding
LOC570723	304.951	183.637	426.266	2.32509	1.21729	0.00481391	0.0432554	Up	12.0128	5.09654	8.7164	4.0754	3.47691	1.80732	570723		protein_coding
LOC570835	177.266	203.347	151.186	0.745058	-0.424575	0.100153	0.306292	Down	4.18744	5.08873	3.95775	5.46785	4.91759	4.77998	570835		protein_coding
LOC570903	12.3236	16.8399	7.80734	0.468955	-1.09248	0.365376	0.62685	Down	0.00943974	0.0186339	0.0958062	0.00913049	0.13644	0.0612379	570903		protein_coding
LOC571123	2.02104	3.45091	0.591166	0.17593	-2.50693	0.335832	0.601618	Down	0.0129353	0	0.0131284	0	0.109062	0	571123	Gpr7	protein_coding			dre04080	Neuroactive ligand-receptor interaction
LOC571410	4.78706	2.63219	6.94193	2.55242	1.35186	0.32402	0.59065	Up	0.0562687	0.388758	0.19988	0.0544254	0	0.168475	571410		protein_coding			dre04080	Neuroactive ligand-receptor interaction
LOC571431	24.6042	3.79107	45.4173	11.7655	3.55649	8.72629e-05	0.00228221	Up	0.158752	0.587577	1.26212	0.0767756	0.0318689	0.0396101	571431		protein_coding			dre04010,dre04012,dre04068,dre04020,dre04144,dre04510,dre04520,dre04540,dre04810,dre04912	MAPK signaling pathway|ErbB signaling pathway|FoxO signaling pathway|Calcium signaling pathway|Endocytosis|Focal adhesion|Adherens junction|Gap junction|Regulation of actin cytoskeleton|GnRH signaling pathway
LOC571446	71.9058	39.0641	104.747	2.6512	1.40664	0.000413554	0.00760979	Up	3.18002	3.2956	2.82405	1.07655	0.510703	1.45465	571446		protein_coding
LOC571488	11.7918	17.2927	6.29097	0.366506	-1.44809	0.045894	0.190246	Down	0.0827143	0.149671	0.0559658	0.200012	0.249069	0.220139	571488		protein_coding
LOC571561	5.62223	10.3456	0.898855	0.0856822	-3.54486	0.00639798	0.0525298	Down	0.0212068	0.041862	0	0.389729	0.102173	0.169321	571561		protein_coding
LOC571651	82.8	90.9071	74.6928	0.820279	-0.285813	0.775521	0.894963	Down	0.0603418	0.878466	2.83246	2.84529	0.672294	0.647401	571651		protein_coding
LOC571721	3.36055	2.54892	4.17217	1.56194	0.643339	0.61034	0.805837	Up	0.0955326	0.0754321	0.0969584	0.0739224	0	0.0762761	571721		protein_coding
LOC571737	298.499	156.368	440.629	2.82741	1.49948	0.0690616	0.245188	Up	11.3438	5.33154	3.4128	0.574732	4.2454	0.579554	571737		protein_coding
LOC571757	2.3789	1.1912	3.56659	2.86212	1.51708	0.505632	0.737804	Up	0.0276392	0	0.0561033	0.0267337	0	0	571757		protein_coding
LOC571865	77.1613	69.2391	85.0834	1.21792	0.284419	0.418937	0.672283	Up	0.992329	0.990305	1.1638	0.95982	0.411694	0.880339	571865		protein_coding			dre04310,dre04370,dre04218,dre04625	Wnt signaling pathway|VEGF signaling pathway|Cellular senescence|C-type lectin receptor signaling pathway
LOC571902	351.225	189.982	512.468	2.69397	1.42973	5.43429e-14	1.50383e-11	Up	6.5706	6.08674	6.62314	2.46188	1.68817	2.00312	571902		protein_coding
LOC571912	192.565	194.452	190.679	0.980576	-0.0282983	0.904505	0.957876	Down	5.73025	7.05508	6.0556	5.91394	4.66061	5.92536	571912	TatD DNase domain containing 3-like	protein_coding
LOC572200	8.66542	4.74473	12.5861	2.72918	1.44847	0.177148	0.427388	Up	0.322559	0.530607	0.654747	0.207995	0.259011	0	572200		protein_coding
LOC572225	193.296	230.455	156.138	0.678094	-0.560444	0.0305474	0.147934	Down	1.6201	2.22148	1.83189	2.46097	2.16093	2.53933	572225		protein_coding
LOC572297	16.542	15.9205	17.1635	1.07053	0.0983289	0.943169	0.975965	Up	0	0.0964182	0.465989	0.377954	0.0470657	0.0584982	572297	interferon-induced protein with tetratricopeptide repeats 5	protein_coding
LOC572462	37.916	42.2026	33.6294	0.800377	-0.321249	0.50486	0.737045	Down	0.488956	0.275769	0.555331	0.596802	0.490781	0.313712	572462		protein_coding
LOC572670	2.22958	1.7868	2.67235	1.42817	0.514171	0.782041	0.898838	Up	0.0648942	0.0320251	0.049397	0.0941525	0	0	572670		protein_coding
LOC573060	8.68961	9.29719	8.08203	0.893088	-0.163125	0.872804	0.944155	Down	0.156157	0.154126	0.538859	0.120833	0.48903	0.155851	573060	E3 ubiquitin-protein ligase RBBP6-like	protein_coding
LOC792443	9.68877	7.0698	12.3077	1.73663	0.796294	0.442809	0.692413	Up	0.635188	0.0569934	0.117212	0.148941	0.092736	0.153683	792443	fat storage inducing transmembrane protein 1-like	protein_coding
LOC792447	1.96747	1.01829	2.91665	2.813	1.49211	0.552354	0.766439	Up	0.131708	0	0.0148527	0	0	0.0438166	792447		protein_coding
LOC792450	2.64998	3.79034	1.50961	0.409356	-1.28857	0.524622	0.748864	Down	0	0.0141917	0.02189	0	0.0606161	0.00717525	792450		protein_coding
LOC792627	10.4193	12.4654	8.37317	0.663782	-0.591218	0.5215	0.747169	Down	0.225828	0.356625	0.0458396	0.37133	0.108802	0.360615	792627		protein_coding
[truncated: 18,480 more rows]
